# Supplementary material for: Improving truffle mycelium flavour through strain selection targeting volatiles of the Ehrlich pathway
Source: Springer Nature journal article supplement (doi:10.1038/s41598-018-27620-w), 2018-06-12
Supplement: MOESM2 [file 41598_2018_27620_MOESM2_ESM.pdf]

# **Improving truffle mycelium flavour through strain selection targeting volatiles of the Ehrlich pathway**

Maryam Vahdatzadeh<sup>1</sup>, Richard Splivallo<sup>1,\*</sup>

<sup>1</sup> Goethe University Frankfurt, Institute for Molecular Biosciences, 60438 Frankfurt, Germany

\* Corresponding author: [richard.splivallo@a3.epfl.ch](mailto:richard.splivallo@a3.epfl.ch)

# Fig. S1 – Part 1

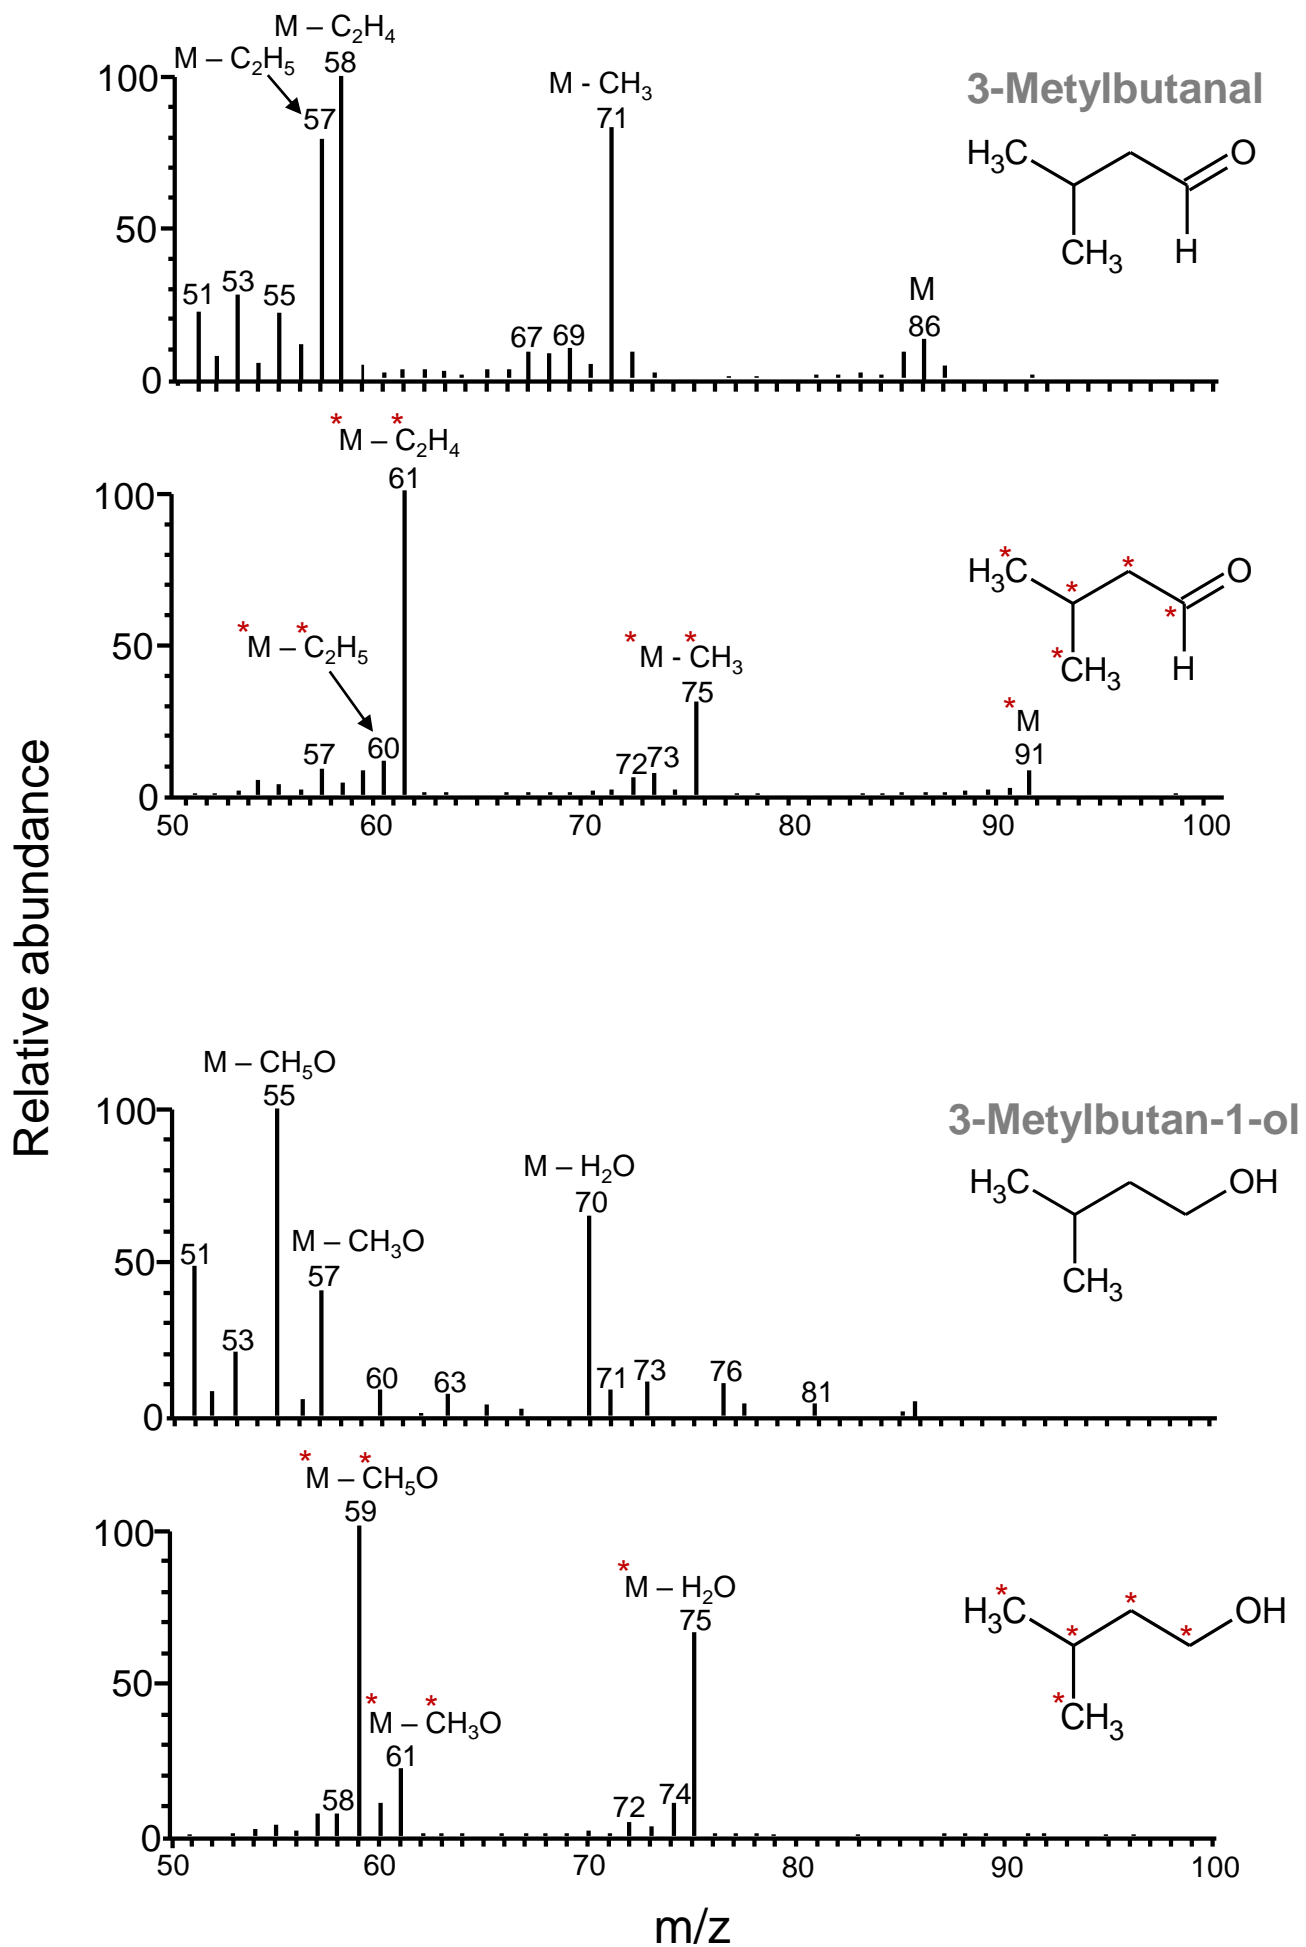

**Fig. S1 – Part 2**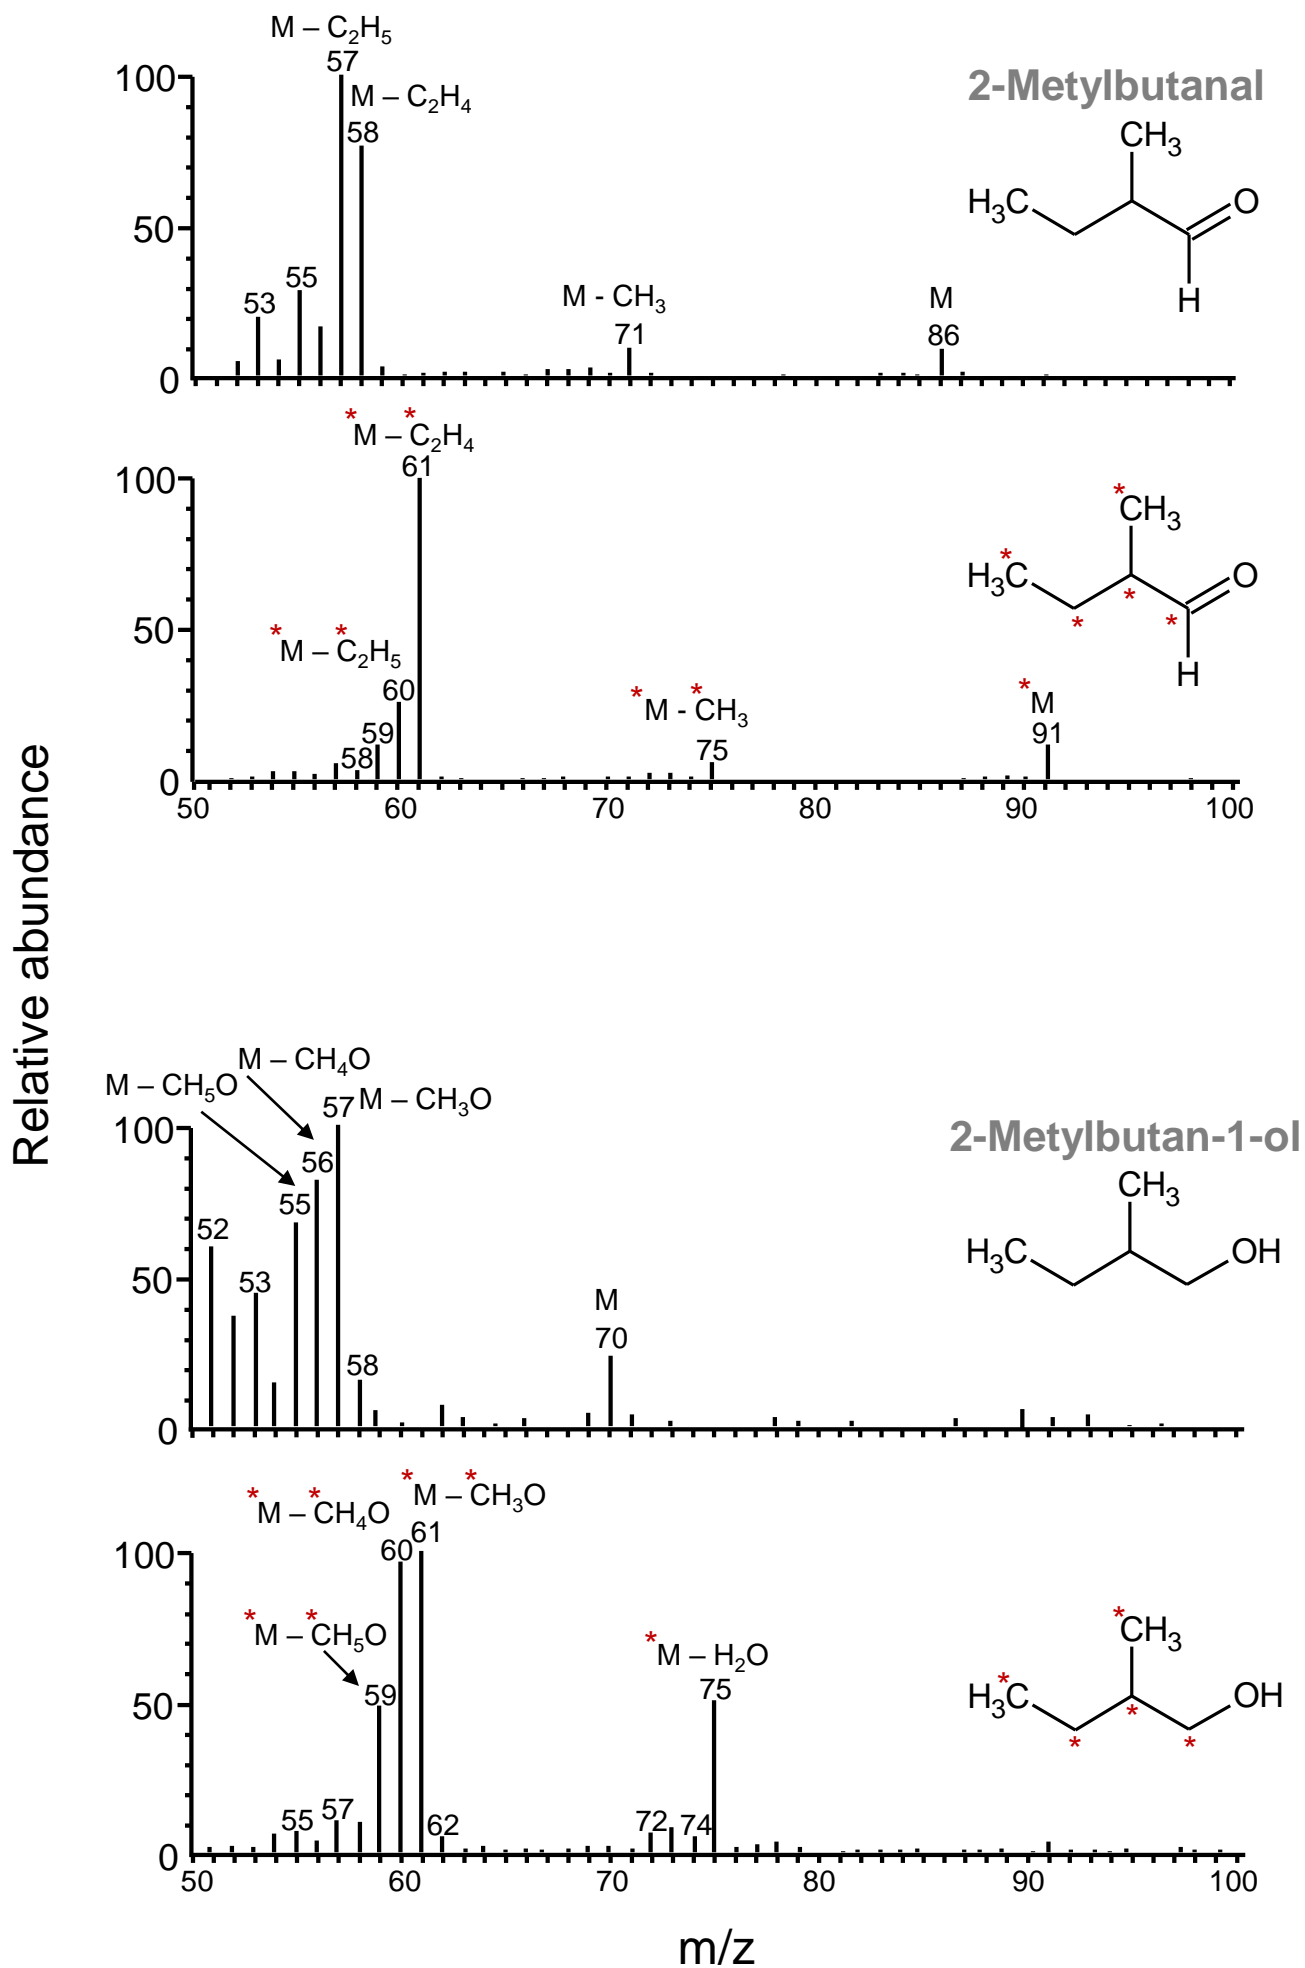

**Fig. S1 – Part 3**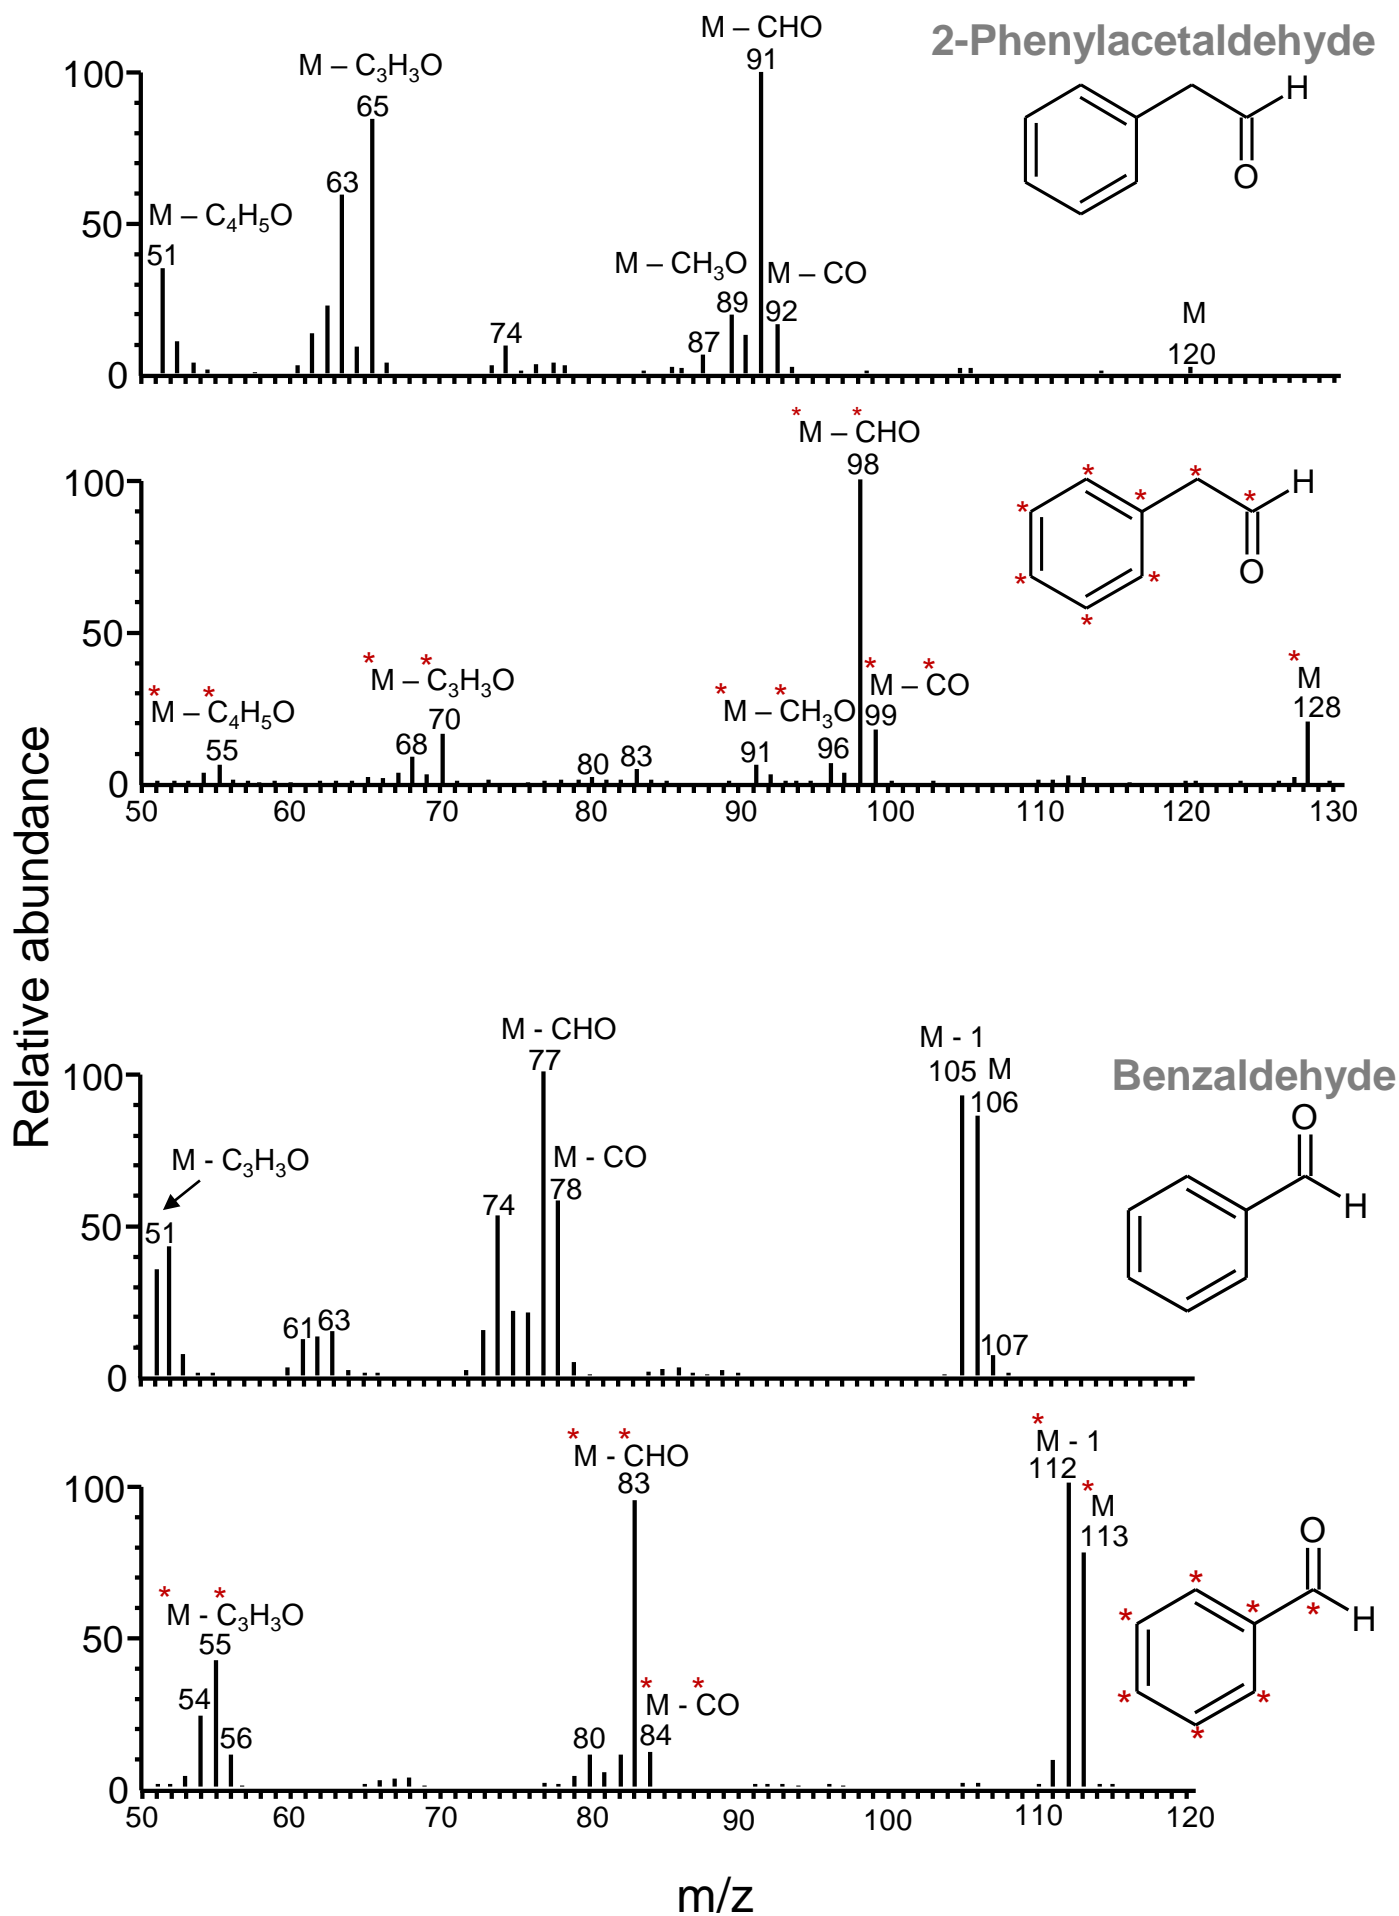

**Fig. S1 – Part 4**

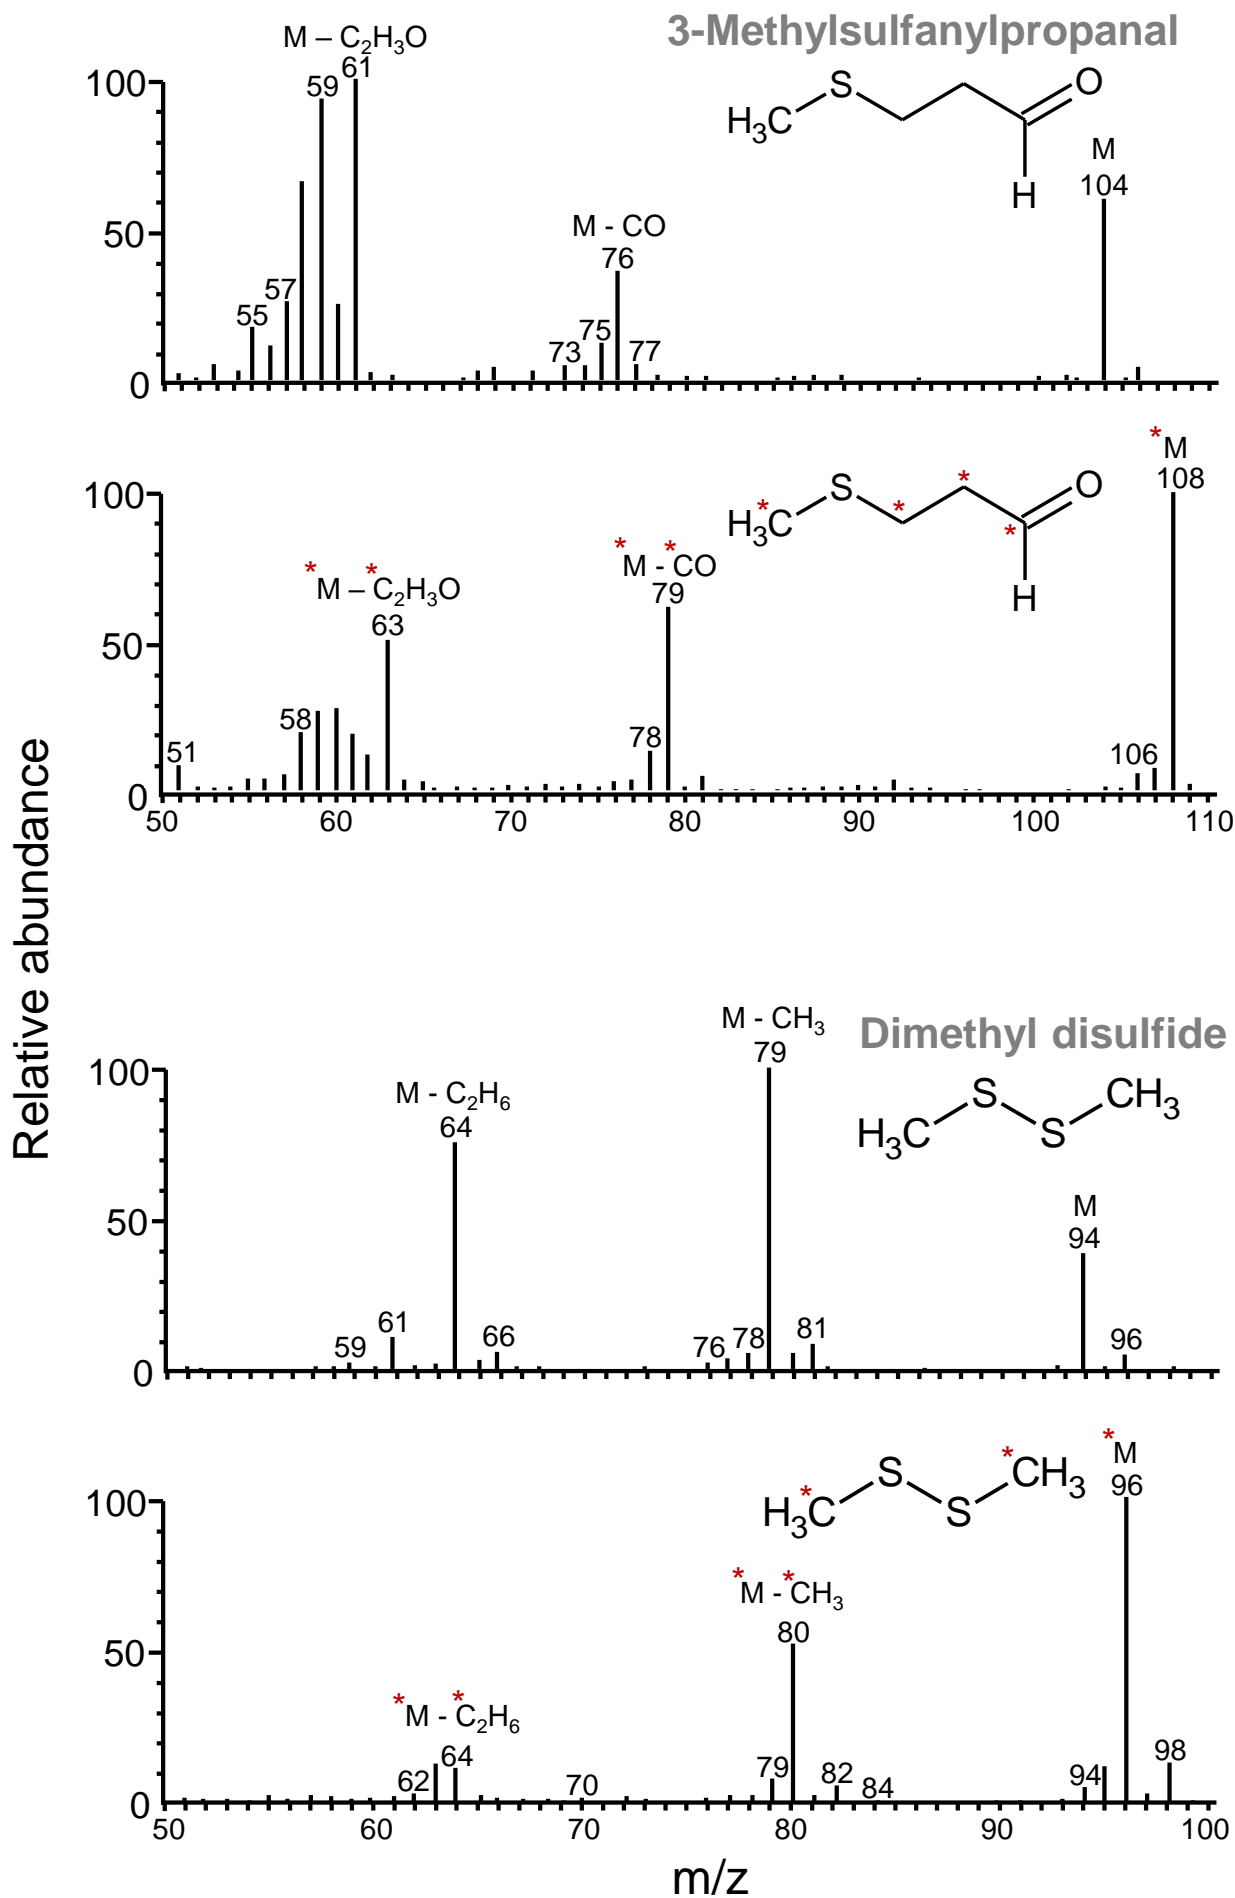

## Fig. S1 – Part 5

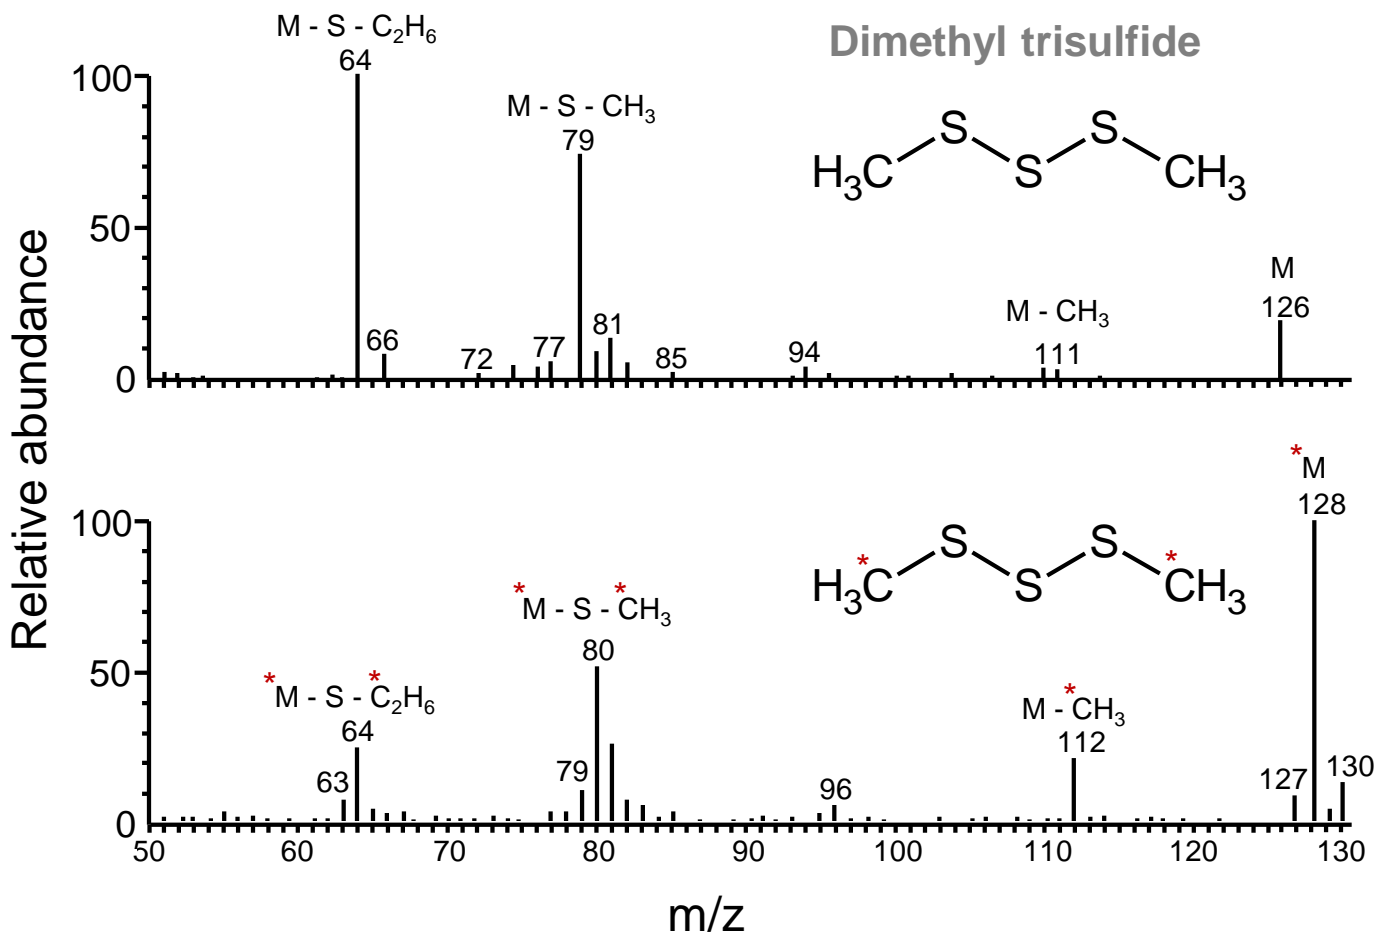

**Figure S1. Demonstrating the existence of the Ehrlich pathway in *T. borchii*.**

Mass spectra of volatile compounds derived from the Ehrlich pathway upon supplementing mycelial cultures with unlabelled and  $^{13}\text{C}$  labelled (\*) amino acids (leucine, isoleucine, phenylalanine, and methionine at 5 mM). Mass spectra illustrate the full incorporation of the labelled carbon atoms into target volatile compounds. Results for strains 2, 3 and 5 were equivalent.
