# Supplementary material for: Improving truffle mycelium flavour through strain selection targeting volatiles of the Ehrlich pathway
Source: Sci Rep. 2018 Jun 18;8:9304. doi: 10.1038/s41598-018-27620-w (PMC6006436; doi:10.1038/s41598-018-27620-w)
Supplement: Supplementary file 1 — Table S1 [file 41598_2018_27620_MOESM1_ESM.xlsx]

## Sheet: Sheet1
Tag_Mass	p values Kruskal-Wallis	Tag_Low_Time (min)	Tag_High_Time (min)	Strain 1_rep_1	Strain 1_rep_2	Strain 1_rep_3	Strain 2_rep_1	Strain 2_rep_2	Strain 2_rep_3	Strain 3_rep_1	Strain 3_rep_2	Strain 3_rep_3	Strain 4_rep_1	Strain 4_rep_2	Strain 4_rep_3	Strain 5_rep_1	Strain 5_rep_2	Strain 5_rep_3	Strain 6_rep_1	Strain 6_rep_2	Strain 6_rep_3	Strain 7_rep_1	Strain 7_rep_2	Strain 7_rep_3	Strain 8_rep_1	Strain 8_rep_2	Strain 8_rep_3	Strain 9_rep_1	Strain 9_rep_2	Strain 9_rep_3	T.borchii_rep_1	T.borchii_rep_2	T.borchii_rep_3
67	0.000672428	1.61	1.669	0	0	0	0	0	0	0	0	0	0	0	0	0	0	0	0	0	0	0	0	0	0	0	0	0	0	0	0.0409166	0.033888	0.0252804
68	0.000672428	1.61	1.669	0	0	0	0	0	0	0	0	0	0	0	0	0	0	0	0	0	0	0	0	0	0	0	0	0	0	0	0.0301109	0.0246986	0.0186207
82	0.000672428	2.059	2.135	0	0	0	0	0	0	0	0	0	0	0	0	0	0	0	0	0	0	0	0	0	0	0	0	0	0	0	0.0129241	0.0123057	0.0101352
132	0.000672428	21.658	21.744	0	0	0	0	0	0	0	0	0	0	0	0	0	0	0	0	0	0	0	0	0	0	0	0	0	0	0	0.00976671	0.0108252	0.0080552
84	0.000672428	3.68	3.754	0	0	0	0	0	0	0	0	0	0	0	0	0	0	0	0	0	0	0	0	0	0	0	0	0	0	0	0.00810241	0.00747816	0.00786292
81	0.000672428	2.059	2.176	0	0	0	0	0	0	0	0	0	0	0	0	0	0	0	0	0	0	0	0	0	0	0	0	0	0	0	0.00687527	0.00655273	0.00529287
71	0.000672428	6.99	7.165	0	0	0	0	0	0	0	0	0	0	0	0	0	0	0	0	0	0	0	0	0	0	0	0	0	0	0	0.0182308	0.000116768	0.00015513
70	0.000672428	10.327	10.33	0	0	0	0	0	0	0	0	0	0	0	0	0	0	0	0	0	0	0	0	0	0	0	0	0	0	0	0.00598841	0.00530922	0.00450998
87	0.000672428	7.417	8.559	0	0	0	0	0	0	0	0	0	0	0	0	0	0	0	0	0	0	0	0	0	0	0	0	0	0	0	0.00435945	0.00360402	0.00663222
55	0.000672428	3.747	3.754	0	0	0	0	0	0	0	0	0	0	0	0	0	0	0	0	0	0	0	0	0	0	0	0	0	0	0	0.00485195	0.00449475	0.00465185
93	0.000672428	3.747	3.87	0	0	0	0	0	0	0	0	0	0	0	0	0	0	0	0	0	0	0	0	0	0	0	0	0	0	0	0.00327669	0.00684358	0.00375341
122	0.000672428	15.65	15.655	0	0	0	0	0	0	0	0	0	0	0	0	0	0	0	0	0	0	0	0	0	0	0	0	0	0	0	0.00438276	0.00422266	0.00406191
67	0.000672428	16.193	16.199	0	0	0	0	0	0	0	0	0	0	0	0	0	0	0	0	0	0	0	0	0	0	0	0	0	0	0	0.00430869	0.00415885	0.0040774
55	0.000672428	10.327	10.808	0	0	0	0	0	0	0	0	0	0	0	0	0	0	0	0	0	0	0	0	0	0	0	0	0	0	0	0.00488891	0.00421602	0.00311054
65	0.000672428	1.61	1.713	0	0	0	0	0	0	0	0	0	0	0	0	0	0	0	0	0	0	0	0	0	0	0	0	0	0	0	0.00464078	0.00397002	0.00285594
97	0.000672428	4.65	4.737	0	0	0	0	0	0	0	0	0	0	0	0	0	0	0	0	0	0	0	0	0	0	0	0	0	0	0	0.00404644	0.00431043	0.00287714
67	0.000672428	21.685	21.704	0	0	0	0	0	0	0	0	0	0	0	0	0	0	0	0	0	0	0	0	0	0	0	0	0	0	0	0.00372568	0.00365683	0.00301809
95	0.000672428	16.193	16.199	0	0	0	0	0	0	0	0	0	0	0	0	0	0	0	0	0	0	0	0	0	0	0	0	0	0	0	0.00349771	0.00342506	0.00342182
61	0.000672428	13.692	13.77	0	0	0	0	0	0	0	0	0	0	0	0	0	0	0	0	0	0	0	0	0	0	0	0	0	0	0	0.00314199	0.00302096	0.00259887
68	0.000672428	21.678	21.689	0	0	0	0	0	0	0	0	0	0	0	0	0	0	0	0	0	0	0	0	0	0	0	0	0	0	0	0.00307982	0.00301692	0.0024962
51	0.000672428	1.61	1.713	0	0	0	0	0	0	0	0	0	0	0	0	0	0	0	0	0	0	0	0	0	0	0	0	0	0	0	0.00338572	0.00291522	0.0020777
124	0.000672428	16.193	16.199	0	0	0	0	0	0	0	0	0	0	0	0	0	0	0	0	0	0	0	0	0	0	0	0	0	0	0	0.00261606	0.00261463	0.00260525
130	0.000672428	20.063	20.139	0	0	0	0	0	0	0	0	0	0	0	0	0	0	0	0	0	0	0	0	0	0	0	0	0	0	0	0.00293034	0.00283759	0.00160637
60	0.000672428	14.037	14.6	0	0	0	0	0	0	0	0	0	0	0	0	0	0	0	0	0	0	0	0	0	0	0	0	0	0	0	0.00264339	0.00241172	0.00221668
104	0.000672428	9.098	9.109	0	0	0	0	0	0	0	0	0	0	0	0	0	0	0	0	0	0	0	0	0	0	0	0	0	0	0	0.00222705	0.00243715	0.00224588
98	0.000672428	4.615	4.753	0	0	0	0	0	0	0	0	0	0	0	0	0	0	0	0	0	0	0	0	0	0	0	0	0	0	0	0.00258631	0.00226833	0.00201996
85	0.000672428	9.772	9.815	0	0	0	0	0	0	0	0	0	0	0	0	0	0	0	0	0	0	0	0	0	0	0	0	0	0	0	0.00230121	0.0024089	0.00148266
69	0.000672428	10.327	10.33	0	0	0	0	0	0	0	0	0	0	0	0	0	0	0	0	0	0	0	0	0	0	0	0	0	0	0	0.00227563	0.00206811	0.00177478
100	0.000672428	9.772	9.786	0	0	0	0	0	0	0	0	0	0	0	0	0	0	0	0	0	0	0	0	0	0	0	0	0	0	0	0.0019725	0.00239974	0.00148998
66	0.000672428	1.61	1.696	0	0	0	0	0	0	0	0	0	0	0	0	0	0	0	0	0	0	0	0	0	0	0	0	0	0	0	0.00235972	0.00195567	0.00136515
78	0.000672428	3.747	3.867	0	0	0	0	0	0	0	0	0	0	0	0	0	0	0	0	0	0	0	0	0	0	0	0	0	0	0	0.00145163	0.00260449	0.00161415
146	0.000672428	28.017	28.02	0	0	0	0	0	0	0	0	0	0	0	0	0	0	0	0	0	0	0	0	0	0	0	0	0	0	0	0.00191818	0.00187723	0.00183436
117	0.000672428	28.017	28.02	0	0	0	0	0	0	0	0	0	0	0	0	0	0	0	0	0	0	0	0	0	0	0	0	0	0	0	0.00187218	0.00185688	0.00181093
115	0.000672428	28.017	28.02	0	0	0	0	0	0	0	0	0	0	0	0	0	0	0	0	0	0	0	0	0	0	0	0	0	0	0	0.00188207	0.00182974	0.00178136
73	0.000672428	14.102	14.531	0	0	0	0	0	0	0	0	0	0	0	0	0	0	0	0	0	0	0	0	0	0	0	0	0	0	0	0.00195129	0.00156021	0.00190738
125	0.000672428	12.862	12.868	0	0	0	0	0	0	0	0	0	0	0	0	0	0	0	0	0	0	0	0	0	0	0	0	0	0	0	0.0016984	0.00218998	0.00148269
91	0.000672428	15.65	15.655	0	0	0	0	0	0	0	0	0	0	0	0	0	0	0	0	0	0	0	0	0	0	0	0	0	0	0	0.00187248	0.0017458	0.00172754
54	0.000672428	20.063	20.077	0	0	0	0	0	0	0	0	0	0	0	0	0	0	0	0	0	0	0	0	0	0	0	0	0	0	0	0.0021608	0.00204586	0.00110502
50	0.000672428	1.593	1.692	0	0	0	0	0	0	0	0	0	0	0	0	0	0	0	0	0	0	0	0	0	0	0	0	0	0	0	0.00258494	0.00146723	0.000824377
152	0.000672428	27.767	27.778	0.00112282	0.00150616	0.00199771	0	0	0	0	0	0	0	0	0	0	0	0	0	0	0	0	0	0	0	0	0	0	0	0	0	0	0
99	0.000672428	21.685	21.704	0	0	0	0	0	0	0	0	0	0	0	0	0	0	0	0	0	0	0	0	0	0	0	0	0	0	0	0.00165597	0.00157222	0.00133137
69	0.000672428	1.593	1.696	0	0	0	0	0	0	0	0	0	0	0	0	0	0	0	0	0	0	0	0	0	0	0	0	0	0	0	0.00180665	0.00150627	0.00105563
94	0.000672428	3.747	3.87	0	0	0	0	0	0	0	0	0	0	0	0	0	0	0	0	0	0	0	0	0	0	0	0	0	0	0	0.00042079	0.00214721	0.00176338
84	0.000672428	10.466	10.613	0	0	0	0	0	0	0	0	0	0	0	0	0	0	0	0	0	0	0	0	0	0	0	0	0	0	0	0.00254063	4.97121e-05	0.0015816
109	0.000672428	16.193	16.199	0	0	0	0	0	0	0	0	0	0	0	0	0	0	0	0	0	0	0	0	0	0	0	0	0	0	0	0.00138302	0.00137791	0.00137216
70	0.000672428	15.263	15.269	0	0	0	0	0	0	0.00173202	0.00106212	0.00125168	0	0	0	0	0	0	0	0	0	0	0	0	0	0	0	0	0	0	0	0	0
52	0.000672428	1.61	1.696	0	0	0	0	0	0	0	0	0	0	0	0	0	0	0	0	0	0	0	0	0	0	0	0	0	0	0	0.00171759	0.00128457	0.00092904
75	0.000672428	15.263	15.269	0	0	0	0	0	0	0.00164889	0.000970678	0.00122015	0	0	0	0	0	0	0	0	0	0	0	0	0	0	0	0	0	0	0	0	0
51	0.000672428	1.965	2.176	0	0	0	0	0	0	0	0	0	0	0	0	0	0	0	0	0	0	0	0	0	0	0	0	0	0	0	0.00137656	0.00130609	0.00108927
55	0.000672428	14.264	14.307	0	0	0	0	0	0	0	0	0	0	0	0	0	0	0	0	0	0	0	0	0	0	0	0	0	0	0	0.00116643	0.00144997	0.00101072
54	0.000672428	1.965	2.176	0	0	0	0	0	0	0	0	0	0	0	0	0	0	0	0	0	0	0	0	0	0	0	0	0	0	0	0.00133356	0.00117205	0.000974893
55	0.000672428	17.698	17.699	0	0	0	0	0	0	0	0	0	0	0	0	0	0	0	0	0	0	0	0	0	0	0	0	0	0	0	0.00106142	0.00114042	0.00122561
63	0.000672428	1.593	1.719	0	0	0	0	0	0	0	0	0	0	0	0	0	0	0	0	0	0	0	0	0	0	0	0	0	0	0	0.00145658	0.00116516	0.000751597
115	0.000672428	11.234	11.255	0	0	0	0	0	0	0	0	0	0	0	0	0	0	0	0	0	0	0	0	0	0	0	0	0	0	0	0.000932388	0.00108047	0.00134022
55	0.000672428	9.746	9.75	0	0	0	0	0	0	0	0	0	0	0	0	0	0	0	0	0	0	0	0	0	0	0	0	0	0	0	0.00128795	0.000986627	0.00107497
55	0.000672428	14.407	14.687	0	0	0	0	0	0	0	0	0	0	0	0	0	0	0	0	0	0	0	0	0	0	0	0	0	0	0	0.00115344	0.000974972	0.00119241
61	0.000672428	7.778	8.559	0	0	0	0	0	0	0	0	0	0	0	0	0	0	0	0	0	0	0	0	0	0	0	0	0	0	0	0.000629083	0.000633846	0.00189208
59	0.000672428	9.896	9.993	0	0	0	0	0	0	0	0	0	0	0	0	0	0	0	0	0	0	0	0	0	0	0	0	0	0	0	0.00152532	0.000863825	0.000733213
71	0.000672428	19.585	19.589	0	0	0	0	0	0	0	0	0	0	0	0	0	0	0	0	0	0	0	0	0	0	0	0	0	0	0	0.0014043	0.00106592	0.000644441
103	0.000672428	9.098	9.109	0	0	0	0	0	0	0	0	0	0	0	0	0	0	0	0	0	0	0	0	0	0	0	0	0	0	0	0.000985437	0.00109752	0.000989232
77	0.000672428	15.65	15.655	0	0	0	0	0	0	0	0	0	0	0	0	0	0	0	0	0	0	0	0	0	0	0	0	0	0	0	0.00104766	0.00100167	0.000977199
112	0.000672428	8.415	8.421	0	0	0	0	0	0	0	0	0	0	0	0	0	0	0	0	0	0	0	0	0	0	0	0	0	0	0	0.00101584	0.000868415	0.00113391
99	0.000672428	9.767	9.773	0	0	0	0	0	0	0	0	0	0	0	0	0	0	0	0	0	0	0	0	0	0	0	0	0	0	0	0.0010113	0.0012209	0.000761778
82	0.000672428	14.307	14.322	0	0	0	0	0	0	0	0	0	0	0	0	0	0	0	0	0	0	0	0	0	0	0	0	0	0	0	0.000935414	0.000901831	0.00115617
69	0.000672428	16.879	16.924	0	0	0	0	0	0	0	0	0	0	0	0	0	0	0	0	0	0	0	0	0	0	0	0	0	0	0	0.00118381	0.00108174	0.000704021
53	0.000672428	20.063	20.077	0	0	0	0	0	0	0	0	0	0	0	0	0	0	0	0	0	0	0	0	0	0	0	0	0	0	0	0.00117443	0.00115294	0.000623167
53	0.000672428	21.685	21.704	0	0	0	0	0	0	0	0	0	0	0	0	0	0	0	0	0	0	0	0	0	0	0	0	0	0	0	0.00107139	0.00102491	0.000842917
131	0.000672428	21.623	21.76	0	0	0	0	0	0	0	0	0	0	0	0	0	0	0	0	0	0	0	0	0	0	0	0	0	0	0	0.000447338	0.00138759	0.00106225
67	0.000672428	5.346	5.35	0	0	0	0	0	0	0	0	0	0	0	0	0	0	0	0	0	0	0	0	0	0	0	0	0	0	0	0.00108923	0.000940473	0.000865587
57	0.000672428	9.746	9.75	0	0	0	0	0	0	0	0	0	0	0	0	0	0	0	0	0	0	0	0	0	0	0	0	0	0	0	0.00110566	0.000811706	0.000931632
58	0.000672428	14.322	14.338	0	0	0	0	0	0	0	0	0	0	0	0	0	0	0	0	0	0	0	0	0	0	0	0	0	0	0	0.000822915	0.00076349	0.0011636
62	0.000672428	1.593	1.719	0	0	0	0	0	0	0	0	0	0	0	0	0	0	0	0	0	0	0	0	0	0	0	0	0	0	0	0.0010852	0.000995067	0.000590743
57	0.000672428	20.008	20.109	0	0	0	0	0	0	0	0	0	0	0	0	0	0	0	0	0	0	0	0	0	0	0	0	0	0	0	0.000969718	0.00113807	0.000545787
70	0.000672428	17.698	17.699	0	0	0	0	0	0	0	0	0	0	0	0	0	0	0	0	0	0	0	0	0	0	0	0	0	0	0	0.000884866	0.000896055	0.000846562
71	0.000672428	10.691	10.808	0	0	0	0	0	0	0	0	0	0	0	0	0	0	0	0	0	0	0	0	0	0	0	0	0	0	0	0.000829572	0.00110731	0.000690308
138	0.000672428	14.316	14.325	0	0	0	0	0	0	0	0	0	0	0	0	0	0	0	0	0	0	0	0	0	0	0	0	0	0	0	0.0008089	0.000764899	0.00104547
94	0.000672428	10.327	10.33	0	0	0	0	0	0	0	0	0	0	0	0	0	0	0	0	0	0	0	0	0	0	0	0	0	0	0	0.000986966	0.000882115	0.00074993
83	0.000672428	3.747	3.754	0	0	0	0	0	0	0	0	0	0	0	0	0	0	0	0	0	0	0	0	0	0	0	0	0	0	0	0.000891236	0.000846171	0.00088071
84	0.000672428	10.327	10.384	0	0	0	0	0	0	0	0	0	0	0	0	0	0	0	0	0	0	0	0	0	0	0	0	0	0	0	0.000188433	0.00226257	0.000146415
97	0.000672428	14.293	14.307	0	0	0	0	0	0	0	0	0	0	0	0	0	0	0	0	0	0	0	0	0	0	0	0	0	0	0	0.000909041	0.000795669	0.000819791
97	0.000672428	10.327	10.33	0	0	0	0	0	0	0	0	0	0	0	0	0	0	0	0	0	0	0	0	0	0	0	0	0	0	0	0.000934299	0.00083266	0.000728243
56	0.000672428	10.327	10.33	0	0	0	0	0	0	0	0	0	0	0	0	0	0	0	0	0	0	0	0	0	0	0	0	0	0	0	0.000947645	0.00083352	0.000707282
87	0.000672428	2.121	2.133	0	0	0	0	0	0	0	0	0	0	0	0	0	0	0	0	0	0	0.000716422	0.00100754	0.00073278	0	0	0	0	0	0	0	0	0
68	0.000672428	13.434	13.499	0	0	0	0	0	0	0	0	0	0	0	0	0	0	0	0	0	0	0	0	0	0	0	0	0	0	0	0.000753192	0.00081523	0.000794544
54	0.000672428	1.571	1.669	0	0	0	0	0	0	0	0	0	0	0	0	0	0	0	0	0	0	0	0	0	0	0	0	0	0	0	0.00100783	0.000764762	0.000579493
92	0.000672428	15.65	15.655	0	0	0	0	0	0	0	0	0	0	0	0	0	0	0	0	0	0	0	0	0	0	0	0	0	0	0	0.000817309	0.000764865	0.000747268
58	0.000672428	5.329	5.35	0	0	0	0	0	0	0	0	0	0	0	0	0	0	0	0	0	0	0	0	0	0	0	0	0	0	0	0.000818328	0.0007567	0.000687161
84	0.000672428	14.245	14.264	0	0	0	0	0	0	0	0	0	0	0	0	0	0	0	0	0	0	0	0	0	0	0	0	0	0	0	0.000603474	0.000757061	0.000889937
83	0.000672428	20.071	20.083	0	0	0	0	0	0	0	0	0	0	0	0	0	0	0	0	0	0	0	0	0	0	0	0	0	0	0	0.000911924	0.000869377	0.00046714
81	0.000672428	17.698	17.699	0	0	0	0	0	0	0	0	0	0	0	0	0	0	0	0	0	0	0	0	0	0	0	0	0	0	0	0.000600416	0.000718006	0.00092642
71	0.000672428	5.329	5.35	0	0	0	0	0	0	0	0	0	0	0	0	0	0	0	0	0	0	0	0	0	0	0	0	0	0	0	0.000825208	0.000739596	0.000679101
79	0.000672428	15.65	15.655	0	0	0	0	0	0	0	0	0	0	0	0	0	0	0	0	0	0	0	0	0	0	0	0	0	0	0	0.000776619	0.000733924	0.000721451
78	0.000672428	9.098	9.109	0	0	0	0	0	0	0	0	0	0	0	0	0	0	0	0	0	0	0	0	0	0	0	0	0	0	0	0.000745834	0.000767237	0.000708307
58	0.000672428	2.783	3.134	0	0	0	0	0	0	0	0	0	0	0	0	0	0	0	0	0	0	0	0	0	0	0	0	0	0	0	0.000808693	0.000785785	0.000626243
69	0.000672428	14.407	14.418	0	0	0	0	0	0	0	0	0	0	0	0	0	0	0	0	0	0	0	0	0	0	0	0	0	0	0	0.000696273	0.000706506	0.000798346
65	0.000672428	16.193	16.199	0	0	0	0	0	0	0	0	0	0	0	0	0	0	0	0	0	0	0	0	0	0	0	0	0	0	0	0.00075394	0.00072636	0.000716808
109	0.000672428	30.901	30.905	0	0	0	0	0	0	0	0	0	0	0	0	0	0	0	0	0	0	0	0	0	0	0	0	0	0	0	0.000471354	0.000943361	0.000757364
57	0.000672428	9.905	10.029	0	0	0	0	0	0	0	0	0	0	0	0	0	0	0	0	0	0	0	0	0	0	0	0	0	0	0	0.000777001	0.000865149	0.000522092
105	0.000672428	17.967	18.028	0	0	0	0	0	0	0	0	0	0	0	0	0	0	0	0	0	0	0	0	0	0	0	0	0	0	0	0.000595623	0.000650451	0.000912451
55	0.000672428	14.102	14.111	0	0	0	0	0	0	0	0	0	0	0	0	0	0	0	0	0	0	0	0	0	0	0	0	0	0	0	0.000865166	0.000538926	0.00075285
75	0.000672428	13.662	13.77	0	0	0	0	0	0	0	0	0	0	0	0	0	0	0	0	0	0	0	0	0	0	0	0	0	0	0	0.00072736	0.000707693	0.000718531
128	0.000672428	14.102	14.111	0	0	0	0	0	0	0	0	0	0	0	0	0	0	0	0	0	0	0	0	0	0	0	0	0	0	0	0.000853317	0.000515136	0.000766363
85	0.000672428	14.102	14.111	0	0	0	0	0	0	0	0	0	0	0	0	0	0	0	0	0	0	0	0	0	0	0	0	0	0	0	0.000843045	0.000527374	0.000758617
83	0.000672428	2.059	2.176	0	0	0	0	0	0	0	0	0	0	0	0	0	0	0	0	0	0	0	0	0	0	0	0	0	0	0	0.000703376	0.000839227	0.000571789
57	0.000672428	6.783	6.849	0	0	0	0	0	0	0	0	0	0	0	0	0	0	0	0	0	0	0	0	0	0	0	0	0	0	0	0.000162697	0.00104988	0.000887431
107	0.000672428	15.65	15.655	0	0	0	0	0	0	0	0	0	0	0	0	0	0	0	0	0	0	0	0	0	0	0	0	0	0	0	0.000716563	0.00068459	0.00065253
81	0.000672428	16.193	16.199	0	0	0	0	0	0	0	0	0	0	0	0	0	0	0	0	0	0	0	0	0	0	0	0	0	0	0	0.000691384	0.000661951	0.000670529
116	0.000672428	28.017	28.02	0	0	0	0	0	0	0	0	0	0	0	0	0	0	0	0	0	0	0	0	0	0	0	0	0	0	0	0.000668961	0.000651363	0.000634901
59	0.000672428	14.57	14.574	0	0	0	0	0	0	0	0	0	0	0	0	0	0	0	0	0	0	0	0	0	0	0	0	0	0	0	0.000834126	0.000509394	0.000591924
68	0.000672428	9.746	9.91	0	0	0	0	0	0	0	0	0	0	0	0	0	0	0	0	0	0	0	0	0	0	0	0	0	0	0	0.000735116	0.0006515	0.000547752
83	0.000672428	17.698	17.699	0	0	0	0	0	0	0	0	0	0	0	0	0	0	0	0	0	0	0	0	0	0	0	0	0	0	0	0.000652446	0.000661453	0.000619977
71	0.000672428	9.746	9.75	0	0	0	0	0	0	0	0	0	0	0	0	0	0	0	0	0	0	0	0	0	0	0	0	0	0	0	0.000745834	0.00056569	0.000618952
55	0.000672428	8.415	8.421	0	0	0	0	0	0	0	0	0	0	0	0	0	0	0	0	0	0	0	0	0	0	0	0	0	0	0	0.000659963	0.000536949	0.000706413
58	0.000672428	9.254	9.32	0	0	0	0	0	0	0	0	0	0	0	0	0	0	0	0	0	0	0	0	0	0	0	0	0	0	0	0.000529149	0.000558625	0.000810422
133	0.000672428	21.658	21.689	0	0	0	0	0	0	0	0	0	0	0	0	0	0	0	0	0	0	0	0	0	0	0	0	0	0	0	0.000728475	0.000550701	0.000616559
58	0.000672428	9.874	9.97	0	0	0	0	0	0	0	0	0	0	0	0	0	0	0	0	0	0	0	0	0	0	0	0	0	0	0	0.000637714	0.000746867	0.000475613
121	0.000672428	15.65	15.655	0	0	0	0	0	0	0	0	0	0	0	0	0	0	0	0	0	0	0	0	0	0	0	0	0	0	0	0.00063308	0.000601582	0.000599557
91	0.000672428	7.757	7.778	0	0	0	0	0	0	0	0	0	0	0	0	0	0	0	0	0	0	0	0	0	0	0	0	0	0	0	0.000600544	0.000641272	0.00058133
59	0.000672428	15.655	15.711	0	0	0	0	0	0	0	0	0	0	0	0	0	0	0	0	0	0	0	0	0	0	0	0	0	0	0	0.000657829	0.000684555	0.000476781
96	0.000672428	16.193	16.199	0	0	0	0	0	0	0	0	0	0	0	0	0	0	0	0	0	0	0	0	0	0	0	0	0	0	0	0.000605592	0.000600396	0.000591611
91	0.000672428	28.017	28.02	0	0	0	0	0	0	0	0	0	0	0	0	0	0	0	0	0	0	0	0	0	0	0	0	0	0	0	0.000613666	0.000590529	0.000585203
55	0.000672428	3.317	3.372	0	0	0	0	0	0	0	0	0	0	0	0	0	0	0	0	0	0	0	0	0	0	0	0	0	0	0	0.000614479	0.000642149	0.000521323
81	0.000672428	9.746	9.75	0	0	0	0	0	0	0	0	0	0	0	0	0	0	0	0	0	0	0	0	0	0	0	0	0	0	0	0.000674774	0.000497396	0.000571604
78	0.000672428	12.862	12.894	0	0	0	0	0	0	0	0	0	0	0	0	0	0	0	0	0	0	0	0	0	0	0	0	0	0	0	0.00061682	0.000826489	0.000287561
73	0.000672428	10.539	10.648	0	0	0	0	0	0	0	0	0	0	0	0	0	0	0	0	0	0	0	0	0	0	0	0	0	0	0	0.000608825	0.000644212	0.000462655
84	0.000672428	4.862	4.868	0	0	0	0	0	0	0	0	0	0	0	0	0	0	0	0	0	0	0	0	0	0	0	0	0	0	0	0.000546062	0.000618634	0.000540889
83	0.000672428	14.242	14.307	0	0	0	0	0	0	0	0	0	0	0	0	0	0	0	0	0	0	0	0	0	0	0	0	0	0	0	0.000479365	0.000560103	0.000648015
65	0.000672428	21.678	21.713	0	0	0	0	0	0	0	0	0	0	0	0	0	0	0	0	0	0	0	0	0	0	0	0	0	0	0	0.000659963	0.000549326	0.000450807
86	0.000672428	11.234	11.297	0	0	0	0	0	0	0	0	0	0	0	0	0	0	0	0	0	0	0	0	0	0	0	0	0	0	0	0.000405406	0.000459717	0.000768428
55	0.000672428	15.263	15.269	0	0	0	0	0	0	0.00054971	0.000470232	0.000610658	0	0	0	0	0	0	0	0	0	0	0	0	0	0	0	0	0	0	0	0	0
61	0.000672428	1.61	1.696	0	0	0	0	0	0	0	0	0	0	0	0	0	0	0	0	0	0	0	0	0	0	0	0	0	0	0	0.000691623	0.000545475	0.000392979
85	0.000672428	11.806	11.813	0	0	0	0	0	0	0	0	0	0	0	0	0	0	0	0	0	0	0	0	0	0	0	0	0	0	0	0.000344506	0.00058508	0.000698168
93	0.000672428	16.193	16.199	0	0	0	0	0	0	0	0	0	0	0	0	0	0	0	0	0	0	0	0	0	0	0	0	0	0	0	0.000541682	0.000544564	0.000540846
60	0.000672428	2.411	2.5	0	0	0	0	0	0	0	0	0	0	0	0	0	0	0	0	0	0	0	0	0	0	0	0	0	0	0	0.00136525	0.000139012	0.000118889
71	0.000672428	20.093	20.101	0	0	0	0	0	0	0	0	0	0	0	0	0	0	0	0	0	0	0	0	0	0	0	0	0	0	0	0.000707995	0.000600258	0.000294852
66	0.000672428	16.193	16.199	0	0	0	0	0	0	0	0	0	0	0	0	0	0	0	0	0	0	0	0	0	0	0	0	0	0	0	0.000549581	0.0005326	0.000510501
55	0.000672428	8.089	8.113	0	0	0	0	0	0	0	0	0	0	0	0	0	0	0	0	0	0	0	0	0	0	0	0	0	0	0	0.000406329	0.000589566	0.000596211
70	0.000672428	20.227	20.229	0	0	0	0	0	0	0	0	0	0	0	0	0	0	0	0	0	0	0	0	0	0	0	0	0	0	0	0.000383874	0.000384994	0.000801564
134	0.000672428	21.658	21.71	0	0	0	0	0	0	0	0	0	0	0	0	0	0	0	0	0	0	0	0	0	0	0	0	0	0	0	0.000585255	0.000392059	0.000590785
56	0.000672428	20.093	20.105	0	0	0	0	0	0	0	0	0	0	0	0	0	0	0	0	0	0	0	0	0	0	0	0	0	0	0	0.000615402	0.000631234	0.000305674
55	0.000672428	19.585	19.589	0	0	0	0	0	0	0	0	0	0	0	0	0	0	0	0	0	0	0	0	0	0	0	0	0	0	0	0.000530725	0.000531362	0.000442875
97	0.000672428	8.415	8.421	0	0	0	0	0	0	0	0	0	0	0	0	0	0	0	0	0	0	0	0	0	0	0	0	0	0	0	0.000506136	0.00042936	0.000566976
61	0.000672428	17.412	17.489	0	0	0	0	0	0	0	0	0	0	0	0	0	0	0	0	0	0	0	0	0	0	0	0	0	0	0	0.000438021	0.000584822	0.00047557
69	0.000672428	17.698	17.699	0	0	0	0	0	0	0	0	0	0	0	0	0	0	0	0	0	0	0	0	0	0	0	0	0	0	0	0.000484525	0.000501831	0.000503751
83	0.000672428	8.415	8.421	0	0	0	0	0	0	0	0	0	0	0	0	0	0	0	0	0	0	0	0	0	0	0	0	0	0	0	0.000491819	0.000426936	0.000562035
52	0.000672428	2.006	2.176	0	0	0	0	0	0	0	0	0	0	0	0	0	0	0	0	0	0	0	0	0	0	0	0	0	0	0	0.000574553	0.000521496	0.000384022
83	0.000672428	14.57	14.574	0	0	0	0	0	0	0	0	0	0	0	0	0	0	0	0	0	0	0	0	0	0	0	0	0	0	0	0.000633367	0.000393107	0.000453313
68	0.000672428	16.446	16.493	0	0	0	0	0	0	0	0	0	0	0	0	0	0	0	0	0	0	0	0	0	0	0	0	0	0	0	0.000452578	0.00056055	0.000455335
82	0.000672428	17.698	17.699	0	0	0	0	0	0	0	0	0	0	0	0	0	0	0	0	0	0	0	0	0	0	0	0	0	0	0	0.000460318	0.000492806	0.00051483
65	0.000672428	9.772	9.823	0	0	0	0	0	0	0	0	0	0	0	0	0	0	0	0	0	0	0	0	0	0	0	0	0	0	0	0.000483633	0.000568354	0.000410736
50	0.000672428	1.929	2.176	0	0	0	0	0	0	0	0	0	0	0	0	0	0	0	0	0	0	0	0	0	0	0	0	0	0	0	0.000378284	0.000563077	0.0005062
56	0.000672428	17.439	17.442	0	0	0	0	0	0	0	0	0	0	0	0	0	0	0	0	0	0	0	0	0	0	0	0	0	0	0	0.000513573	0.000587057	0.000340846
53	0.000672428	14.264	14.322	0	0	0	0	0	0	0	0	0	0	0	0	0	0	0	0	0	0	0	0	0	0	0	0	0	0	0	0.00049873	0.00045884	0.000480241
106	0.000672428	9.905	9.993	0	0	0	0	0	0	0	0	0	0	0	0	0	0	0	0	0	0	0	0	0	0	0	0	0	0	0	0.000549358	0.00055254	0.000328928
79	0.000672428	16.193	16.199	0	0	0	0	0	0	0	0	0	0	0	0	0	0	0	0	0	0	0	0	0	0	0	0	0	0	0	0.00048376	0.000468002	0.000468123
134	0.000672428	21.188	21.191	0	0	0	0	0	0	0	0	0	0	0	0	0	0	0	0	0	0	0	0	0	0	0	0	0	0	0	0.00038518	0.000572927	0.000451804
105	0.000672428	9.905	9.97	0	0	0	0	0	0	0	0	0	0	0	0	0	0	0	0	0	0	0	0	0	0	0	0	0	0	0	0.00046019	0.000584117	0.000361594
59	0.000672428	8.042	8.559	0	0	0	0	0	0	0	0	0	0	0	0	0	0	0	0	0	0	0	0	0	0	0	0	0	0	0	0.000155913	0.000268174	0.000977527
86	0.000672428	9.746	9.75	0	0	0	0	0	0	0	0	0	0	0	0	0	0	0	0	0	0	0	0	0	0	0	0	0	0	0	0.000516504	0.000420971	0.000445567
97	0.000672428	21.658	21.727	0	0	0	0	0	0	0	0	0	0	0	0	0	0	0	0	0	0	0	0	0	0	0	0	0	0	0	0.000597677	0.00045853	0.000316724
81	0.000672428	14.912	14.921	0	0	0	0	0	0	0	0	0	0	0	0	0	0	0	0	0	0	0	0	0	0	0	0	0	0	0	0.000414834	0.000519158	0.000435513
85	0.000672428	3.682	3.754	0	0	0	0	0	0	0	0	0	0	0	0	0	0	0	0	0	0	0	0	0	0	0	0	0	0	0	0.000474937	0.000414336	0.000458639
55	0.000672428	13.293	13.295	0	0	0	0	0	0	0	0	0	0	0	0	0	0	0	0	0	0	0	0	0	0	0	0	0	0	0	0.000500227	0.000361839	0.000485139
71	0.000672428	8.089	8.113	0	0	0	0	0	0	0	0	0	0	0	0	0	0	0	0	0	0	0	0	0	0	0	0	0	0	0	0.000332354	0.000494319	0.000510885
81	0.000672428	17.623	17.627	0	0	0	0	0	0	0	0	0	0	0	0	0	0	0	0	0	0	0	0	0	0	0	0	0	0	0	0.000393302	0.000336863	0.000598831
77	0.000672428	16.193	16.199	0	0	0	0	0	0	0	0	0	0	0	0	0	0	0	0	0	0	0	0	0	0	0	0	0	0	0	0.000448548	0.000442527	0.000432737
91	0.000672428	16.193	16.199	0	0	0	0	0	0	0	0	0	0	0	0	0	0	0	0	0	0	0	0	0	0	0	0	0	0	0	0.000445491	0.000437662	0.000434403
75	0.000672428	9.905	9.921	0	0	0	0	0	0	0	0	0	0	0	0	0	0	0	0	0	0	0	0	0	0	0	0	0	0	0	0.000474077	0.000526584	0.000310843
77	0.000672428	17.967	17.972	0	0	0	0	0	0	0	0	0	0	0	0	0	0	0	0	0	0	0	0	0	0	0	0	0	0	0	0.000373554	0.000399484	0.000536674
97	0.000672428	17.698	17.699	0	0	0	0	0	0	0	0	0	0	0	0	0	0	0	0	0	0	0	0	0	0	0	0	0	0	0	0.000380689	0.000425647	0.000503253
69	0.000672428	6.99	7.123	0	0	0	0	0	0	0	0	0	0	0	0	0	0	0	0	0	0	0	0	0	0	0	0	0	0	0	0.000899088	0.000243386	0.000156454
58	0.000672428	12.475	12.483	0	0	0	0	0	0	0	0	0	0	0	0	0	0	0	0	0	0	0	0	0	0	0	0	0	0	0	0.000331415	0.000364005	0.000599286
67	0.000672428	17.698	17.699	0	0	0	0	0	0	0	0	0	0	0	0	0	0	0	0	0	0	0	0	0	0	0	0	0	0	0	0.000389432	0.000420559	0.000479629
83	0.000672428	10.327	10.566	0	0	0	0	0	0	0	0	0	0	0	0	0	0	0	0	0	0	0	0	0	0	0	0	0	0	0	0.000516408	0.000418513	0.000353634
62	0.000672428	13.692	13.77	0	0	0	0	0	0	0	0	0	0	0	0	0	0	0	0	0	0	0	0	0	0	0	0	0	0	0	0.000498332	0.000407357	0.000341188
86	0.000672428	14.102	14.111	0	0	0	0	0	0	0	0	0	0	0	0	0	0	0	0	0	0	0	0	0	0	0	0	0	0	0	0.000510722	0.000294044	0.000441736
70	0.000672428	14.293	14.307	0	0	0	0	0	0	0	0	0	0	0	0	0	0	0	0	0	0	0	0	0	0	0	0	0	0	0	0.000450205	0.000395668	0.000394388
98	0.000672428	16.879	16.924	0	0	0	0	0	0	0	0	0	0	0	0	0	0	0	0	0	0	0	0	0	0	0	0	0	0	0	0.000494845	0.000424323	0.000292844
57	0.000672428	21.188	21.191	0	0	0	0	0	0	0	0	0	0	0	0	0	0	0	0	0	0	0	0	0	0	0	0	0	0	0	0.000329599	0.000485295	0.000389604
117	0.000672428	37.354	37.356	0	0	0	0	0	0	0	0	0	0	0	0	0	0	0	0	0	0	0	0	0	0	0	0	0	0	0	0.000232022	0.000465441	0.000502071
56	0.000672428	11.234	11.255	0	0	0	0	0	0	0	0	0	0	0	0	0	0	0	0	0	0	0	0	0	0	0	0	0	0	0	0.000340301	0.000381367	0.000467752
71	0.000672428	14.245	14.338	0	0	0	0	0	0	0	0	0	0	0	0	0	0	0	0	0	0	0	0	0	0	0	0	0	0	0	0.000425488	0.000321667	0.000439387
57	0.000672428	11.171	11.255	0	0	0	0	0	0	0	0	0	0	0	0	0	0	0	0	0	0	0	0	0	0	0	0	0	0	0	0.000361833	0.000350288	0.000464321
113	0.000672428	8.265	8.42	0	0	0	0	0	0	0	0	0	0	0	0	0	0	0	0	0	0	0	0	0	0	0	0	0	0	0	0.000332752	0.000426094	0.00041713
55	0.000672428	16.193	16.199	0	0	0	0	0	0	0	0	0	0	0	0	0	0	0	0	0	0	0	0	0	0	0	0	0	0	0	0.000401918	0.000385269	0.000379835
69	0.000672428	13.293	13.295	0	0	0	0	0	0	0	0	0	0	0	0	0	0	0	0	0	0	0	0	0	0	0	0	0	0	0	0.000421586	0.000320774	0.000424648
51	0.000672428	3.747	3.754	0	0	0	0	0	0	0	0	0	0	0	0	0	0	0	0	0	0	0	0	0	0	0	0	0	0	0	0.000422892	0.000378341	0.000364499
74	0.000672428	12.029	12.035	0	0	0	0	0	0	0	0	0	0	0	0	0	0	0	0	0	0	0	0	0	0	0	0	0	0	0	0.000215539	0.000327237	0.0006174
85	0.000672428	12.029	12.035	0	0	0	0	0	0	0	0	0	0	0	0	0	0	0	0	0	0	0	0	0	0	0	0	0	0	0	0.000240526	0.000331827	0.00057965
67	0.000672428	6.686	6.99	0	0	0	0	0	0	0	0	0	0	0	0	0	0	0	0	0	0	0	0	0	0	0	0	0	0	0	0.000562306	0.000330675	0.000257258
70	0.000672428	8.089	8.113	0	0	0	0	0	0	0	0	0	0	0	0	0	0	0	0	0	0	0	0	0	0	0	0	0	0	0	0.000280325	0.000416399	0.00043661
77	0.000672428	9.098	9.109	0	0	0	0	0	0	0	0	0	0	0	0	0	0	0	0	0	0	0	0	0	0	0	0	0	0	0	0.000369095	0.000401083	0.000356567
56	0.000672428	11.54	11.544	0	0	0	0	0	0	0	0	0	0	0	0	0	0	0	0	0	0	0	0	0	0	0	0	0	0	0	0.000256373	0.000352901	0.000515143
67	0.000672428	14.302	14.316	0	0	0	0	0	0	0	0	0	0	0	0	0	0	0	0	0	0	0	0	0	0	0	0	0	0	0	0.000395755	0.000334989	0.000375279
123	0.000672428	15.65	15.655	0	0	0	0	0	0	0	0	0	0	0	0	0	0	0	0	0	0	0	0	0	0	0	0	0	0	0	0.000381613	0.000363215	0.000361039
97	0.000672428	20.071	20.156	0	0	0	0	0	0	0	0	0	0	0	0	0	0	0	0	0	0	0	0	0	0	0	0	0	0	0	0.000332259	0.000375282	0.000396767
61	0.000672428	3.747	3.799	0	0	0	0	0	0	0	0	0	0	0	0	0	0	0	0	0	0	0	0	0	0	0	0	0	0	0	0.000364461	0.000524779	0.000209412
56	0.000672428	14.242	14.246	0	0	0	0	0	0	0	0	0	0	0	0	0	0	0	0	0	0	0	0	0	0	0	0	0	0	0	0.000293193	0.000363816	0.000439956
55	0.000672428	11.54	11.544	0	0	0	0	0	0	0	0	0	0	0	0	0	0	0	0	0	0	0	0	0	0	0	0	0	0	0	0.00025615	0.000345303	0.000493299
88	0.000672428	13.692	13.77	0	0	0	0	0	0	0	0	0	0	0	0	0	0	0	0	0	0	0	0	0	0	0	0	0	0	0	0.000398303	0.000369368	0.000315286
51	0.000672428	9.098	9.16	0	0	0	0	0	0	0	0	0	0	0	0	0	0	0	0	0	0	0	0	0	0	0	0	0	0	0	0.000330825	0.000414474	0.000323872
81	0.000672428	30.901	30.905	0	0	0	0	0	0	0	0	0	0	0	0	0	0	0	0	0	0	0	0	0	0	0	0	0	0	0	0.000229362	0.000465166	0.000374068
124	0.000672428	30.901	30.905	0	0	0	0	0	0	0	0	0	0	0	0	0	0	0	0	0	0	0	0	0	0	0	0	0	0	0	0.000229649	0.000469755	0.000368301
107	0.000672428	13.692	13.77	0	0	0	0	0	0	0	0	0	0	0	0	0	0	0	0	0	0	0	0	0	0	0	0	0	0	0	0.000375672	0.000367942	0.000317222
108	0.000672428	13.648	13.77	0	0	0	0	0	0	0	0	0	0	0	0	0	0	0	0	0	0	0	0	0	0	0	0	0	0	0	0.00034484	0.000424942	0.000281751
132	0.000672428	17.439	17.442	0	0	0	0	0	0	0	0	0	0	0	0	0	0	0	0	0	0	0	0	0	0	0	0	0	0	0	0.000374908	0.000425011	0.000248486
87	0.000672428	14.338	14.549	0	0	0	0	0	0	0	0	0	0	0	0	0	0	0	0	0	0	0	0	0	0	0	0	0	0	0	0.000327131	0.000255557	0.000458454
83	0.000672428	13.648	13.662	0	0	0	0	0	0	0	0	0	0	0	0	0	0	0	0	0	0	0	0	0	0	0	0	0	0	0	0.000339234	0.000298719	0.000400839
83	0.000672428	19.585	19.589	0	0	0	0	0	0	0	0	0	0	0	0	0	0	0	0	0	0	0	0	0	0	0	0	0	0	0	0.000334345	0.000377018	0.000322007
61	0.000672428	20.063	20.096	0	0	0	0	0	0	0	0	0	0	0	0	0	0	0	0	0	0	0	0	0	0	0	0	0	0	0	0.000497409	0.000342501	0.000188764
118	0.000672428	28.017	28.02	0	0	0	0	0	0	0	0	0	0	0	0	0	0	0	0	0	0	0	0	0	0	0	0	0	0	0	0.000350191	0.00034104	0.000336247
81	0.000672428	10.327	10.33	0	0	0	0	0	0	0	0	0	0	0	0	0	0	0	0	0	0	0	0	0	0	0	0	0	0	0	0.000391343	0.000338462	0.000294097
79	0.000672428	10.327	10.33	0	0	0	0	0	0	0	0	0	0	0	0	0	0	0	0	0	0	0	0	0	0	0	0	0	0	0	0.000382122	0.000345303	0.000295165
68	0.000672428	6.686	6.99	0	0	0	0	0	0	0	0	0	0	0	0	0	0	0	0	0	0	0	0	0	0	0	0	0	0	0	0.000489302	0.000223962	0.000302698
111	0.000672428	14.242	14.246	0	0	0	0	0	0	0	0	0	0	0	0	0	0	0	0	0	0	0	0	0	0	0	0	0	0	0	0.000261341	0.00033774	0.000413755
101	0.000672428	16.937	16.941	0	0	0	0	0	0	0	0	0	0	0	0	0	0	0	0	0	0	0	0	0	0	0	0	0	0	0	0.000345939	0.000315771	0.000349006
85	0.000672428	20.227	20.229	0	0	0	0	0	0	0	0	0	0	0	0	0	0	0	0	0	0	0	0	0	0	0	0	0	0	0	0.000244922	0.000262965	0.00050227
100	0.000672428	14.102	14.111	0	0	0	0	0	0	0	0	0	0	0	0	0	0	0	0	0	0	0	0	0	0	0	0	0	0	0	0.000401583	0.000251551	0.000349732
96	0.000672428	9.746	9.75	0	0	0	0	0	0	0	0	0	0	0	0	0	0	0	0	0	0	0	0	0	0	0	0	0	0	0	0.000393079	0.000287048	0.00032242
55	0.000672428	12.475	12.483	0	0	0	0	0	0	0	0	0	0	0	0	0	0	0	0	0	0	0	0	0	0	0	0	0	0	0	0.000331208	0.000348552	0.000321594
81	0.000672428	8.089	8.113	0	0	0	0	0	0	0	0	0	0	0	0	0	0	0	0	0	0	0	0	0	0	0	0	0	0	0	0.000251659	0.000364229	0.000372431
53	0.000672428	16.193	16.199	0	0	0	0	0	0	0	0	0	0	0	0	0	0	0	0	0	0	0	0	0	0	0	0	0	0	0	0.000340206	0.000324813	0.000318433
98	0.000672428	13.648	13.717	0	0	0	0	0	0	0	0	0	0	0	0	0	0	0	0	0	0	0	0	0	0	0	0	0	0	0	0.000367263	0.000327013	0.000277735
61	0.000672428	21.188	21.191	0	0	0	0	0	0	0	0	0	0	0	0	0	0	0	0	0	0	0	0	0	0	0	0	0	0	0	0.000292397	0.000436562	0.000242691
188	0.000672428	37.354	37.356	0	0	0	0	0	0	0	0	0	0	0	0	0	0	0	0	0	0	0	0	0	0	0	0	0	0	0	0.000191571	0.000372944	0.000405125
84	0.000672428	16.937	17.013	0	0	0	0	0	0	0	0	0	0	0	0	0	0	0	0	0	0	0	0	0	0	0	0	0	0	0	0.0003303	0.000245398	0.000393349
57	0.000672428	14.399	14.574	0	0	0	0	0	0	0	0	0	0	0	0	0	0	0	0	0	0	0	0	0	0	0	0	0	0	0	0.000297254	0.000179046	0.000492074
59	0.000672428	14.95	15.008	0	0	0	0	0	0	0	0	0	0	0	0	0	0	0	0	0	0	0	0	0	0	0	0	0	0	0	0.000345174	0.000377344	0.000245154
57	0.000672428	14.293	14.307	0	0	0	0	0	0	0	0	0	0	0	0	0	0	0	0	0	0	0	0	0	0	0	0	0	0	0	0.000344283	0.000296158	0.000324285
96	0.000672428	8.089	8.113	0	0	0	0	0	0	0	0	0	0	0	0	0	0	0	0	0	0	0	0	0	0	0	0	0	0	0	0.000238727	0.000347916	0.000370764
55	0.000672428	2.907	2.984	0	0	0	0	0	0	0	0	0	0	0	0	0	0	0	0	0	0	0	0	0	0	0	0	0	0	0	0.00035223	0.000321135	0.000283488
69	0.000672428	11.806	11.869	0	0	0	0	0	0	0	0	0	0	0	0	0	0	0	0	0	0	0	0	0	0	0	0	0	0	0	0.000176648	0.000351148	0.000424905
85	0.000672428	7.099	7.147	0	0	0	0	0	0	0	0	0	0	0	0	0	0	0	0	0	0	0	0	0	0	0	0	0	0	0	0.000484413	0.000271354	0.000191968
57	0.000672428	7.908	8.173	0	0	0	0	0	0	0	0	0	0	0	0	0	0	0	0	0	0	0	0	0	0	0	0	0	0	0	0.000341862	0.000271577	0.000333598
111	0.000672428	14.407	14.418	0	0	0	0	0	0	0	0	0	0	0	0	0	0	0	0	0	0	0	0	0	0	0	0	0	0	0	0.000292906	0.000291775	0.000355499
55	0.000672428	9.905	9.958	0	0	0	0	0	0	0	0	0	0	0	0	0	0	0	0	0	0	0	0	0	0	0	0	0	0	0	0.000390356	0.000335952	0.000205097
68	0.000672428	16.193	16.199	0	0	0	0	0	0	0	0	0	0	0	0	0	0	0	0	0	0	0	0	0	0	0	0	0	0	0	0.000324375	0.00030587	0.000298995
108	0.000672428	14.264	14.307	0	0	0	0	0	0	0	0	0	0	0	0	0	0	0	0	0	0	0	0	0	0	0	0	0	0	0	0.000308641	0.000294663	0.000323759
69	0.000672428	14.302	14.316	0	0	0	0	0	0	0	0	0	0	0	0	0	0	0	0	0	0	0	0	0	0	0	0	0	0	0	0.000325649	0.000296897	0.000301502
84	0.000672428	2.413	2.585	0	0	0	0	0	0	0	0	0	0	0	0	0	0	0	0	0	0	0	0	0	0	0	0	0	0	0	0.000335938	0.000348225	0.000232652
143	0.000672428	8.265	8.341	0	0	0	0	0	0	0	0	0	0	0	0	0	0	0	0	0	0	0	0	0	0	0	0	0	0	0	6.93566e-05	0.000436786	0.00039923
93	0.000672428	17.252	17.258	0	0	0	0	0	0	0	0	0	0	0	0	0	0	0	0	0	0	0	0	0	0	0	0	0	0	0	0.000308704	0.000280808	0.000309291
91	0.000672428	23.872	23.875	0	0	0	0	0	0	0	0	0	0	0	0	0	0	0	0	0	0	0	0	0	0	0	0	0	0	0	0.00026588	0.000352815	0.000277692
83	0.000672428	4.862	4.915	0	0	0	0	0	0	0	0	0	0	0	0	0	0	0	0	0	0	0	0	0	0	0	0	0	0	0	0.00031783	0.000280636	0.000296119
107	0.000672428	26.03	26.038	0	0	0	0	0	0	0	0	0	0	0	0	0.000310434	0.000262629	0.000319326	0	0	0	0	0	0	0	0	0	0	0	0	0	0	0
84	0.000672428	14.399	14.413	0	0	0	0	0	0	0	0	0	0	0	0	0	0	0	0	0	0	0	0	0	0	0	0	0	0	0	0.00027483	0.000287357	0.000325724
80	0.000672428	17.623	17.699	0	0	0	0	0	0	0	0	0	0	0	0	0	0	0	0	0	0	0	0	0	0	0	0	0	0	0	0.000221097	0.00026422	0.00039577
110	0.000672428	12.862	12.894	0	0	0	0	0	0	0	0	0	0	0	0	0	0	0	0	0	0	0	0	0	0	0	0	0	0	0	0.000352564	0.000375746	0.000146016
55	0.000672428	4.862	4.868	0	0	0	0	0	0	0	0	0	0	0	0	0	0	0	0	0	0	0	0	0	0	0	0	0	0	0	0.000290645	0.000303498	0.000278903
145	0.000672428	28.017	28.02	0	0	0	0	0	0	0	0	0	0	0	0	0	0	0	0	0	0	0	0	0	0	0	0	0	0	0	0.000291839	0.000281943	0.000286122
115	0.000672428	37.354	37.356	0	0	0	0	0	0	0	0	0	0	0	0	0	0	0	0	0	0	0	0	0	0	0	0	0	0	0	0.000172699	0.000328973	0.000350871
83	0.000672428	18.306	18.312	0	0	0	0	0	0	0	0	0	0	0	0	0	0	0	0	0	0	0	0	0	0	0	0	0	0	0	0.000247454	0.000287821	0.000313278
57	0.000672428	10.327	10.33	0	0	0	0	0	0	0	0	0	0	0	0	0	0	0	0	0	0	0	0	0	0	0	0	0	0	0	0.000313243	0.000287529	0.000243175
71	0.000672428	10.327	10.33	0	0	0	0	0	0	0	0	0	0	0	0	0	0	0	0	0	0	0	0	0	0	0	0	0	0	0	0.000319661	0.000276132	0.000245112
99	0.000672428	4.642	4.67	0	0	0	0	0	0	0	0	0	0	0	0	0	0	0	0	0	0	0	0	0	0	0	0	0	0	0	0.000391471	0.000227297	0.000221986
85	0.000672428	14.307	14.322	0	0	0	0	0	0	0	0	0	0	0	0	0	0	0	0	0	0	0	0	0	0	0	0	0	0	0	0.00029418	0.000256055	0.000289583
105	0.000672428	23.278	23.281	0	0	0	0	0	0	0	0	0	0	0	0	0	0	0	0	0	0	0	0	0	0	0	0	0	0	0	0.000192717	0.000274998	0.000361808
57	0.000672428	4.351	4.352	0	0	0	0	0	0	0	0	0	0	0	0	0	0	0	0	0	0	0	0	0	0	0	0	0	0	0	0.000296123	0.000246738	0.000283887
95	0.000672428	14.307	14.322	0	0	0	0	0	0	0	0	0	0	0	0	0	0	0	0	0	0	0	0	0	0	0	0	0	0	0	0.00026123	0.00024844	0.000308636
84	0.000672428	8.274	8.286	0	0	0	0	0	0	0	0	0	0	0	0	0	0	0	0	0	0	0	0	0	0	0	0	0	0	0	0.00030106	0.000244779	0.000272224
54	0.000672428	3.37	3.372	0	0	0	0	0	0	0	0	0	0	0	0	0	0	0	0	0	0	0	0	0	0	0	0	0	0	0	0.000283765	0.000289334	0.000240512
71	0.000672428	21.658	21.713	0	0	0	0	0	0	0	0	0	0	0	0	0	0	0	0	0	0	0	0	0	0	0	0	0	0	0	0.000248919	0.000294886	0.000268721
98	0.000672428	18.306	18.312	0	0	0	0	0	0	0	0	0	0	0	0	0	0	0	0	0	0	0	0	0	0	0	0	0	0	0	0.000238138	0.000267538	0.000302185
104	0.000672428	37.354	37.356	0	0	0	0	0	0	0	0	0	0	0	0	0	0	0	0	0	0	0	0	0	0	0	0	0	0	0	0.000157251	0.000307985	0.000336631
67	0.000672428	20.093	20.156	0	0	0	0	0	0	0	0	0	0	0	0	0	0	0	0	0	0	0	0	0	0	0	0	0	0	0	0.000253936	0.000258909	0.000284456
86	0.000672428	2.783	2.795	0	0	0	0	0	0	0	0	0	0	0	0	0	0	0	0	0	0	0	0	0	0	0	0	0	0	0	0.000292094	0.000245896	0.000258483
59	0.000672428	15.179	15.234	0	0	0	0	0	0	0	0	0	0	0	0	0	0	0	0	0	0	0	0	0	0	0	0	0	0	0	0.000291791	0.000308036	0.000190274
67	0.000672428	16.07	16.076	0	0	0	0	0	0	0	0	0	0	0	0	0	0	0	0	0	0	0	0	0	0	0	0	0	0	0	0.000300041	0.000202974	0.000285624
56	0.000672428	9.905	9.921	0	0	0	0	0	0	0	0	0	0	0	0	0	0	0	0	0	0	0	0	0	0	0	0	0	0	0	0.000294817	0.000311199	0.000181473
53	0.000672428	10.327	10.384	0	0	0	0	0	0	0	0	0	0	0	0	0	0	0	0	0	0	0	0	0	0	0	0	0	0	0	0.000243887	0.00036251	0.000181018
68	0.000672428	17.698	17.699	0	0	0	0	0	0	0	0	0	0	0	0	0	0	0	0	0	0	0	0	0	0	0	0	0	0	0	0.000235446	0.000258582	0.000293299
120	0.000672428	17.967	17.972	0	0	0	0	0	0	0	0	0	0	0	0	0	0	0	0	0	0	0	0	0	0	0	0	0	0	0	0.000227515	0.000246102	0.000313278
55	0.000672428	9.588	9.66	0	0	0	0	0	0	0	0	0	0	0	0	0	0	0	0	0	0	0	0	0	0	0	0	0	0	0	0.000297015	0.000243799	0.000245183
95	0.000672428	17.698	17.699	0	0	0	0	0	0	0	0	0	0	0	0	0	0	0	0	0	0	0	0	0	0	0	0	0	0	0	0.000219632	0.000242613	0.000309818
59	0.000672428	7.82	7.938	0	0	0	0	0	0	0	0	0	0	0	0	0	0	0	0	0	0	0	0	0	0	0	0	0	0	0	0.000197272	0.000338118	0.000226927
56	0.000672428	14.399	14.574	0	0	0	0	0	0	0	0	0	0	0	0	0	0	0	0	0	0	0	0	0	0	0	0	0	0	0	0.000333851	0.000105286	0.000323118
78	0.000672428	15.65	15.655	0	0	0	0	0	0	0	0	0	0	0	0	0	0	0	0	0	0	0	0	0	0	0	0	0	0	0	0.000271327	0.00025052	0.000236568
55	0.000672428	5.058	5.072	0	0	0	0	0	0	0	0	0	0	0	0	0	0	0	0	0	0	0	0	0	0	0	0	0	0	0	0.000332943	0.000170589	0.000253812
111	0.000672428	20.153	20.156	0	0	0	0	0	0	0	0	0	0	0	0	0	0	0	0	0	0	0	0	0	0	0	0	0	0	0	0.000151263	0.000276493	0.000329568
72	0.000672428	9.746	9.75	0	0	0	0	0	0	0	0	0	0	0	0	0	0	0	0	0	0	0	0	0	0	0	0	0	0	0	0.00029082	0.000231302	0.000235015
104	0.000672428	17.439	17.442	0	0	0	0	0	0	0	0	0	0	0	0	0	0	0	0	0	0	0	0	0	0	0	0	0	0	0	0.000267154	0.000304134	0.000179238
115	0.000672428	20.063	20.083	0	0	0	0	0	0	0	0	0	0	0	0	0	0	0	0	0	0	0	0	0	0	0	0	0	0	0	0.000277697	0.000228535	0.000239473
57	0.000672428	12.475	12.483	0	0	0	0	0	0	0	0	0	0	0	0	0	0	0	0	0	0	0	0	0	0	0	0	0	0	0	0.000245766	0.000265011	0.000227269
69	0.000672428	21.678	21.689	0	0	0	0	0	0	0	0	0	0	0	0	0	0	0	0	0	0	0	0	0	0	0	0	0	0	0	0.000266294	0.000253924	0.00021508
98	0.000672428	17.004	17.013	0	0	0	0	0	0	0	0	0	0	0	0	0	0	0	0	0	0	0	0	0	0	0	0	0	0	0	0.000200601	0.000211706	0.000320341
67	0.000672428	9.746	9.75	0	0	0	0	0	0	0	0	0	0	0	0	0	0	0	0	0	0	0	0	0	0	0	0	0	0	0	0.000275611	0.000239502	0.000214282
58	0.000672428	9.746	9.795	0	0	0	0	0	0	0	0	0	0	0	0	0	0	0	0	0	0	0	0	0	0	0	0	0	0	0	0.000176314	0.000351044	0.000197095
53	0.000672428	5.346	5.35	0	0	0	0	0	0	0	0	0	0	0	0	0	0	0	0	0	0	0	0	0	0	0	0	0	0	0	0.0002737	0.00022783	0.000210096
60	0.000672428	13.692	13.77	0	0	0	0	0	0	0	0	0	0	0	0	0	0	0	0	0	0	0	0	0	0	0	0	0	0	0	0.000253267	0.000243352	0.000213613
70	0.000672428	12.475	12.483	0	0	0	0	0	0	0	0	0	0	0	0	0	0	0	0	0	0	0	0	0	0	0	0	0	0	0	0.000231783	0.000232884	0.000243445
143	0.000672428	18.517	18.539	0	0	0	0	0	0	0	0	0	0	0	0	0	0	0	0	0	0	0	0	0	0	0	0	0	0	0	0.000276041	0.000325535	0.000100975
56	0.000672428	12.133	12.253	0	0	0	0	0	0	0	0	0	0	0	0	0	0	0	0	0	0	0	0	0	0	0	0	0	0	0	0.000341989	0.000171586	0.000187938
70	0.000672428	8.681	8.683	0	0	0	0	0	0	0	0	0	0	0	0	0	0	0	0	0	0	0	0	0	0	0	0	0	0	0	0.000196651	0.000152798	0.000351897
139	0.000672428	20.153	20.156	0	0	0	0	0	0	0	0	0	0	0	0	0	0	0	0	0	0	0	0	0	0	0	0	0	0	0	0.000142695	0.000242991	0.000311939
125	0.000672428	16.193	16.199	0	0	0	0	0	0	0	0	0	0	0	0	0	0	0	0	0	0	0	0	0	0	0	0	0	0	0	0.000232787	0.000226988	0.000235015
61	0.000672428	7.026	7.06	0	0	0	0	0	0	0	0	0	0	0	0	0	0	0	0	0	0	0	0	0	0	0	0	0	0	0	0.000284051	0.000180799	0.000229505
110	0.000672428	13.434	13.441	0	0	0	0	0	0	0	0	0	0	0	0	0	0	0	0	0	0	0	0	0	0	0	0	0	0	0	0.000203642	0.000242372	0.000243744
85	0.000672428	21.659	21.704	0	0	0	0	0	0	0	0	0	0	0	0	0	0	0	0	0	0	0	0	0	0	0	0	0	0	0	0.000333405	0.00021853	0.000137586
106	0.000672428	16.193	16.199	0	0	0	0	0	0	0	0	0	0	0	0	0	0	0	0	0	0	0	0	0	0	0	0	0	0	0	0.000230621	0.000233898	0.000224976
106	0.000672428	7.757	7.778	0	0	0	0	0	0	0	0	0	0	0	0	0	0	0	0	0	0	0	0	0	0	0	0	0	0	0	0.000222276	0.000240361	0.000226301
93	0.000672428	15.65	15.655	0	0	0	0	0	0	0	0	0	0	0	0	0	0	0	0	0	0	0	0	0	0	0	0	0	0	0	0.000238361	0.000228999	0.000220263
65	0.000672428	15.65	15.655	0	0	0	0	0	0	0	0	0	0	0	0	0	0	0	0	0	0	0	0	0	0	0	0	0	0	0	0.000241641	0.000221917	0.000219437
117	0.000672428	10.458	10.585	0	0	0	0	0	0	0	0	0	0	0	0	0	0	0	0	0	0	0	0	0	0	0	0	0	0	0	0.000265753	0.000185441	0.000230274
71	0.000672428	15.234	15.348	0	0	0	0	0	0	0	0	0	0	0	0	0	0	0	0	0	0	0	0	0	0	0	0	0	0	0	0.000149033	0.000258135	0.000272167
68	0.000672428	14.307	14.322	0	0	0	0	0	0	0	0	0	0	0	0	0	0	0	0	0	0	0	0	0	0	0	0	0	0	0	0.000231433	0.000197765	0.000241537
93	0.000672428	14.267	14.316	0	0	0	0	0	0	0	0	0	0	0	0	0	0	0	0	0	0	0	0	0	0	0	0	0	0	0	0.000210045	0.000183361	0.000275585
84	0.000672428	10.691	10.808	0	0	0	0	0	0	0	0	0	0	0	0	0	0	0	0	0	0	0	0	0	0	0	0	0	0	0	0.000215284	0.000275462	0.000176276
77	0.000672428	28.017	28.02	0	0	0	0	0	0	0	0	0	0	0	0	0	0	0	0	0	0	0	0	0	0	0	0	0	0	0	0.000245017	0.000176674	0.000243218
127	0.000672428	12.862	12.868	0	0	0	0	0	0	0	0	0	0	0	0	0	0	0	0	0	0	0	0	0	0	0	0	0	0	0	0.000225317	0.00029052	0.000147027
54	0.000672428	3.747	3.754	0	0	0	0	0	0	0	0	0	0	0	0	0	0	0	0	0	0	0	0	0	0	0	0	0	0	0	0.000227021	0.000205037	0.000221018
56	0.000672428	4.351	4.352	0	0	0	0	0	0	0	0	0	0	0	0	0	0	0	0	0	0	0	0	0	0	0	0	0	0	0	0.000228694	0.000194499	0.000227739
82	0.000672428	14.912	14.921	0	0	0	0	0	0	0	0	0	0	0	0	0	0	0	0	0	0	0	0	0	0	0	0	0	0	0	0.000227053	0.000231457	0.000188237
147	0.000672428	28.017	28.02	0	0	0	0	0	0	0	0	0	0	0	0	0	0	0	0	0	0	0	0	0	0	0	0	0	0	0	0.000223566	0.000209145	0.000211491
63	0.000672428	13.648	13.77	0	0	0	0	0	0	0	0	0	0	0	0	0	0	0	0	0	0	0	0	0	0	0	0	0	0	0	0.000196125	0.000216296	0.000231698
172	0.000672428	30.901	30.905	0	0	0	0	0	0	0	0	0	0	0	0	0	0	0	0	0	0	0	0	0	0	0	0	0	0	0	0.000137041	0.000275771	0.000231085
71	0.000672428	17.698	17.728	0	0	0	0	0	0	0	0	0	0	0	0	0	0	0	0	0	0	0	0	0	0	0	0	0	0	0	0.000146612	0.000152712	0.00034341
128	0.000672428	14.877	14.921	0	0	0	0	0	0	0	0	0	0	0	0	0	0	0	0	0	0	0	0	0	0	0	0	0	0	0	0.000177269	0.000294147	0.000171135
69	0.000672428	18.457	18.46	0	0	0	0	0	0	0	0	0	0	0	0	0	0	0	0	0	0	0	0	0	0	0	0	0	0	0	0.00021495	0.000212841	0.000214296
70	0.000672428	18.457	18.46	0	0	0	0	0	0	0	0	0	0	0	0	0	0	0	0	0	0	0	0	0	0	0	0	0	0	0	0.000215921	0.000206842	0.000216902
101	0.000672428	14.57	14.574	0	0	0	0	0	0	0	0	0	0	0	0	0	0	0	0	0	0	0	0	0	0	0	0	0	0	0	0.000274512	0.000171809	0.000191327
85	0.000672428	32.02	32.048	0	0	0	0	0	0	0	0	0	0	0	0	0	0	0	0	0	0	0	0	0	0	0	0	0	0	0	0.000179802	0.000246721	0.000210024
59	0.000672428	21.658	21.713	0	0	0	0	0	0	0	0	0	0	0	0	0	0	0	0	0	0	0	0	0	0	0	0	0	0	0	0.000247613	0.000276029	0.000109291
70	0.000672428	11.54	11.544	0	0	0	0	0	0	0	0	0	0	0	0	0	0	0	0	0	0	0	0	0	0	0	0	0	0	0	0.000152107	0.000197043	0.000283161
98	0.000672428	16.446	16.493	0	0	0	0	0	0	0	0	0	0	0	0	0	0	0	0	0	0	0	0	0	0	0	0	0	0	0	0.000189978	0.000243576	0.000195599
79	0.000672428	14.307	14.322	0	0	0	0	0	0	0	0	0	0	0	0	0	0	0	0	0	0	0	0	0	0	0	0	0	0	0	0.000219138	0.000198659	0.000208244
104	0.000672428	7.026	7.06	0	0	0	0	0	0	0	0	0	0	0	0	0	0	0	0	0	0	0	0	0	0	0	0	0	0	0	0.000237023	0.000181882	0.000206692
56	0.000672428	12.475	12.483	0	0	0	0	0	0	0	0	0	0	0	0	0	0	0	0	0	0	0	0	0	0	0	0	0	0	0	0.000213851	0.000219184	0.000191071
51	0.000672428	16.193	16.199	0	0	0	0	0	0	0	0	0	0	0	0	0	0	0	0	0	0	0	0	0	0	0	0	0	0	0	0.000218629	0.000205862	0.000198049
97	0.000672428	18.306	18.312	0	0	0	0	0	0	0	0	0	0	0	0	0	0	0	0	0	0	0	0	0	0	0	0	0	0	0	0.00019138	0.000199725	0.000231242
58	0.000672428	14.102	14.111	0	0	0	0	0	0	0	0	0	0	0	0	0	0	0	0	0	0	0	0	0	0	0	0	0	0	0	0.000242979	0.000157198	0.000221516
51	0.000672428	15.65	15.655	0	0	0	0	0	0	0	0	0	0	0	0	0	0	0	0	0	0	0	0	0	0	0	0	0	0	0	0.0002214	0.00019847	0.000201566
73	0.000672428	15.111	15.234	0	0	0	0	0	0	0	0	0	0	0	0	0	0	0	0	0	0	0	0	0	0	0	0	0	0	0	0.000164417	0.000228019	0.000228323
105	0.000672428	19.873	19.879	0	0	0	0	0	0	0	0	0	0	0	0	0	0	0	0	0	0	0	0	0	0	0	0	0	0	0	0.000164704	0.000211861	0.000243445
137	0.000672428	17.623	17.627	0	0	0	0	0	0	0	0	0	0	0	0	0	0	0	0	0	0	0	0	0	0	0	0	0	0	0	0.000182843	0.000150099	0.000285738
98	0.000672428	17.654	17.699	0	0	0	0	0	0	0	0	0	0	0	0	0	0	0	0	0	0	0	0	0	0	0	0	0	0	0	0.000170533	0.000250262	0.000194318
105	0.000672428	9.098	9.109	0	0	0	0	0	0	0	0	0	0	0	0	0	0	0	0	0	0	0	0	0	0	0	0	0	0	0	0.000195823	0.00021774	0.00020037
149	0.000672428	28.017	28.02	0	0	0	0	0	0	0	0	0	0	0	0	0	0	0	0	0	0	0	0	0	0	0	0	0	0	0	0.000238361	0.0001211	0.000252474
70	0.000672428	5.058	5.072	0	0	0	0	0	0	0	0	0	0	0	0	0	0	0	0	0	0	0	0	0	0	0	0	0	0	0	0.000273875	0.000134921	0.00020309
84	0.000672428	4.567	4.67	0	0	0	0	0	0	0	0	0	0	0	0	0	0	0	0	0	0	0	0	0	0	0	0	0	0	0	0.000228104	0.000285948	9.61906e-05
91	0.000672428	26.993	27.024	0	0	0	0	0	0	0	0	0	0	0	0	0	0	0	0	0	0	0	0	0	0	0	0	0	0	0	0.000140019	0.000222054	0.00024561
79	0.000672428	12.862	12.894	0	0	0	0	0	0	0	0	0	0	0	0	0	0	0	0	0	0	0	0	0	0	0	0	0	0	0	0.000167825	0.000282527	0.000151897
102	0.000672428	9.098	9.121	0	0	0	0	0	0	0	0	0	0	0	0	0	0	0	0	0	0	0	0	0	0	0	0	0	0	0	0.000172301	0.000185234	0.000244627
78	0.000672428	28.017	28.02	0	0	0	0	0	0	0	0	0	0	0	0	0	0	0	0	0	0	0	0	0	0	0	0	0	0	0	0.000205092	0.000199983	0.00019681
69	0.000672428	12.475	12.483	0	0	0	0	0	0	0	0	0	0	0	0	0	0	0	0	0	0	0	0	0	0	0	0	0	0	0	0.000198626	0.000207237	0.000193862
69	0.000672428	11.54	11.544	0	0	0	0	0	0	0	0	0	0	0	0	0	0	0	0	0	0	0	0	0	0	0	0	0	0	0	0.000137503	0.000190236	0.000270815
67	0.000672428	7.099	7.114	0	0	0	0	0	0	0	0	0	0	0	0	0	0	0	0	0	0	0	0	0	0	0	0	0	0	0	0.000224776	0.000171139	0.000201737
97	0.000672428	9.772	9.786	0	0	0	0	0	0	0	0	0	0	0	0	0	0	0	0	0	0	0	0	0	0	0	0	0	0	0	0.000203101	0.00023529	0.000150929
55	0.000672428	18.306	18.312	0	0	0	0	0	0	0	0	0	0	0	0	0	0	0	0	0	0	0	0	0	0	0	0	0	0	0	0.000180375	0.000193829	0.000214339
80	0.000672428	3.747	3.79	0	0	0	0	0	0	0	0	0	0	0	0	0	0	0	0	0	0	0	0	0	0	0	0	0	0	0	0.000232404	0.000141057	0.000208558
54	0.000672428	5.346	5.35	0	0	0	0	0	0	0	0	0	0	0	0	0	0	0	0	0	0	0	0	0	0	0	0	0	0	0	0.000210411	0.000195823	0.000174852
56	0.000672428	12.59	12.685	0	0	0	0	0	0	0	0	0	0	0	0	0	0	0	0	0	0	0	0	0	0	0	0	0	0	0	0.000258124	0.00020789	0.000110872
58	0.000672428	21.659	21.71	0	0	0	0	0	0	0	0	0	0	0	0	0	0	0	0	0	0	0	0	0	0	0	0	0	0	0	0.000133601	0.0002619	0.000179138
79	0.000672428	8.415	8.421	0	0	0	0	0	0	0	0	0	0	0	0	0	0	0	0	0	0	0	0	0	0	0	0	0	0	0	0.000197415	0.000165174	0.000211192
123	0.000672428	16.193	16.199	0	0	0	0	0	0	0	0	0	0	0	0	0	0	0	0	0	0	0	0	0	0	0	0	0	0	0	0.000183751	0.00018948	0.000198875
71	0.000672428	20.227	20.229	0	0	0	0	0	0	0	0	0	0	0	0	0	0	0	0	0	0	0	0	0	0	0	0	0	0	0	0.000140975	0.000154568	0.000272267
50	0.000672428	3.747	3.754	0	0	0	0	0	0	0	0	0	0	0	0	0	0	0	0	0	0	0	0	0	0	0	0	0	0	0	0.000185774	0.000181882	0.000199772
144	0.000672428	25.576	25.578	0	0	0	0	0	0	0	0	0	0	0	0	0	0	0	0	0	0	0	0	0	0	0	0	0	0	0	0.000146023	0.000165948	0.000254638
85	0.000672428	20.063	20.077	0	0	0	0	0	0	0	0	0	0	0	0	0	0	0	0	0	0	0	0	0	0	0	0	0	0	0	0.000239412	0.000231216	9.0694e-05
69	0.000672428	9.746	9.823	0	0	0	0	0	0	0	0	0	0	0	0	0	0	0	0	0	0	0	0	0	0	0	0	0	0	0	0.000149989	0.000241049	0.000169298
98	0.000672428	21.685	21.713	0	0	0	0	0	0	0	0	0	0	0	0	0	0	0	0	0	0	0	0	0	0	0	0	0	0	0	0.000206621	0.000234792	0.000116611
94	0.000672428	14.316	14.325	0	0	0	0	0	0	0	0	0	0	0	0	0	0	0	0	0	0	0	0	0	0	0	0	0	0	0	0.000172587	0.000168904	0.000213485
56	0.000672428	17.698	17.699	0	0	0	0	0	0	0	0	0	0	0	0	0	0	0	0	0	0	0	0	0	0	0	0	0	0	0	0.000179085	0.000192299	0.000178682
71	0.000672428	6.393	6.399	0	0	0	0	0	0	0	0	0	0	0	0	0	0	0	0	0	0	0	0	0	0	0	0	0	0	0	0.000147759	0.000169145	0.000232595
87	0.000672428	9.746	9.795	0	0	0	0	0	0	0	0	0	0	0	0	0	0	0	0	0	0	0	0	0	0	0	0	0	0	0	0.000173192	0.000245862	0.000128344
61	0.000672428	10.539	10.678	0	0	0	0	0	0	0	0	0	0	0	0	0	0	0	0	0	0	0	0	0	0	0	0	0	0	0	0.000233854	0.000180851	0.000131705
131	0.000672428	20.063	20.077	0	0	0	0	0	0	0	0	0	0	0	0	0	0	0	0	0	0	0	0	0	0	0	0	0	0	0	0.00021737	0.00021358	0.000113834
91	0.000672428	8.113	8.126	0	0	0	0	0	0	0	0	0	0	0	0	0	0	0	0	0	0	0	0	0	0	0	0	0	0	0	0.000174689	0.000192041	0.000176874
84	0.000672428	17.698	17.699	0	0	0	0	0	0	0	0	0	0	0	0	0	0	0	0	0	0	0	0	0	0	0	0	0	0	0	0.000185009	0.000178393	0.000174524
137	0.000672428	27.024	27.028	0	0	0	0	0	0	0	0	0	0	0	0	0	0	0	0	0	0	0	0	0	0	0	0	0	0	0	0.000163844	0.000178754	0.000194546
89	0.000672428	9.896	9.933	0	0	0	0	0	0	0	0	0	0	0	0	0	0	0	0	0	0	0	0	0	0	0	0	0	0	0	0.000221575	0.000225578	8.54252e-05
119	0.000672428	15.88	15.887	0	0	0	0	0	0	0	0	0	0	0	0	0	0	0	0	0	0	0	0	0	0	0	0	0	0	0	0.000182397	0.000157164	0.000191783
84	0.000672428	18.457	18.46	0	0	0	0	0	0	0	0	0	0	0	0	0	0	0	0	0	0	0	0	0	0	0	0	0	0	0	0.000173606	0.000175694	0.000177913
56	0.000672428	8.415	8.421	0	0	0	0	0	0	0	0	0	0	0	0	0	0	0	0	0	0	0	0	0	0	0	0	0	0	0	0.000199597	0.000139441	0.00018687
53	0.000672428	9.746	9.773	0	0	0	0	0	0	0	0	0	0	0	0	0	0	0	0	0	0	0	0	0	0	0	0	0	0	0	0.000187096	0.000197043	0.000140662
108	0.000672428	14.407	14.418	0	0	0	0	0	0	0	0	0	0	0	0	0	0	0	0	0	0	0	0	0	0	0	0	0	0	0	0.000167316	0.00016373	0.000193349
91	0.000672428	12.216	12.221	0	0	0	0	0	0	0	0	0	0	0	0	0	0	0	0	0	0	0	0	0	0	0	0	0	0	0	0.000149941	0.000180335	0.000191384
65	0.000672428	2.411	2.421	0	0	0	0	0	0	0	0	0	0	0	0	0	0	0	0	0	0	0	0	0	0	0	0	0	0	0	0.00018794	0.000173391	0.000159686
99	0.000672428	19.589	19.617	0	0	0	0	0	0	0	0	0	0	0	0	0	0	0	0	0	0	0	0	0	0	0	0	0	0	0	0.000125925	0.000153331	0.0002397
71	0.000672428	14.407	14.418	0	0	0	0	0	0	0	0	0	0	0	0	0	0	0	0	0	0	0	0	0	0	0	0	0	0	0	0.000159783	0.000168028	0.00018949
85	0.000672428	6.833	6.849	0	0	0	0	0	0	0	0	0	0	0	0	0	0	0	0	0	0	0	0	0	0	0	0	0	0	0	8.64768e-05	0.00016428	0.000266343
87	0.000672428	3.582	3.674	0	0	0	0	0	0	0	0	0	0	0	0	0	0	0	0	0	0	0	0	0	0	0	0	0	0	0	0.000100412	9.12076e-05	0.000323702
57	0.000672428	11.54	11.607	0	0	0	0	0	0	0	0	0	0	0	0	0	0	0	0	0	0	0	0	0	0	0	0	0	0	0	0.000131117	0.00017009	0.000211918
72	0.000672428	20.008	20.101	0	0	0	0	0	0	0	0	0	0	0	0	0	0	0	0	0	0	0	0	0	0	0	0	0	0	0	0.000165612	0.000241375	0.000105518
55	0.000672428	8.681	8.683	0	0	0	0	0	0	0	0	0	0	0	0	0	0	0	0	0	0	0	0	0	0	0	0	0	0	0	0.000136882	0.000110202	0.000265233
57	0.000672428	19.585	19.589	0	0	0	0	0	0	0	0	0	0	0	0	0	0	0	0	0	0	0	0	0	0	0	0	0	0	0	0.000208261	0.000173649	0.000130124
70	0.000672428	5.317	5.35	0	0	0	0	0	0	0	0	0	0	0	0	0	0	0	0	0	0	0	0	0	0	0	0	0	0	0	0.000215794	0.000145767	0.000149946
103	0.000672428	14.95	15.008	0	0	0	0	0	0	0	0	0	0	0	0	0	0	0	0	0	0	0	0	0	0	0	0	0	0	0	0.000186618	0.000195995	0.000128359
55	0.000672428	17.439	17.442	0	0	0	0	0	0	0	0	0	0	0	0	0	0	0	0	0	0	0	0	0	0	0	0	0	0	0	0.000179133	0.000201427	0.000129469
68	0.000672428	12.475	12.483	0	0	0	0	0	0	0	0	0	0	0	0	0	0	0	0	0	0	0	0	0	0	0	0	0	0	0	0.00017246	0.000183704	0.000153634
71	0.000672428	9.254	9.261	0	0	0	0	0	0	0	0	0	0	0	0	0	0	0	0	0	0	0	0	0	0	0	0	0	0	0	0.000159878	0.000141556	0.000208358
77	0.000672428	9.905	9.921	0	0	0	0	0	0	0	0	0	0	0	0	0	0	0	0	0	0	0	0	0	0	0	0	0	0	0	0.000184547	0.000202664	0.000122022
78	0.000672428	9.905	9.933	0	0	0	0	0	0	0	0	0	0	0	0	0	0	0	0	0	0	0	0	0	0	0	0	0	0	0	0.000127804	0.000205982	0.000173869
59	0.000672428	14.322	14.338	0	0	0	0	0	0	0	0	0	0	0	0	0	0	0	0	0	0	0	0	0	0	0	0	0	0	0	0.00014451	0.000144426	0.000216019
53	0.000672428	4.65	4.661	0	0	0	0	0	0	0	0	0	0	0	0	0	0	0	0	0	0	0	0	0	0	0	0	0	0	0	0.000175056	0.000193674	0.000133741
145	0.000672428	37.354	37.356	0	0	0	0	0	0	0	0	0	0	0	0	0	0	0	0	0	0	0	0	0	0	0	0	0	0	0	9.91218e-05	0.00019003	0.000213114
101	0.000672428	9.772	9.786	0	0	0	0	0	0	0	0	0	0	0	0	0	0	0	0	0	0	0	0	0	0	0	0	0	0	0	0.000167985	0.000205965	0.000128059
83	0.000672428	6.759	6.99	0	0	0	0	0	0	0	0	0	0	0	0	0	0	0	0	0	0	0	0	0	0	0	0	0	0	0	0.000247582	8.70993e-05	0.000163431
51	0.000672428	20.071	20.083	0	0	0	0	0	0	0	0	0	0	0	0	0	0	0	0	0	0	0	0	0	0	0	0	0	0	0	0.000206238	0.000189446	0.000100861
64	0.000672428	1.61	1.616	0	0	0	0	0	0	0	0	0	0	0	0	0	0	0	0	0	0	0	0	0	0	0	0	0	0	0	0.000211621	0.00015737	0.000127248
75	0.000672428	18.517	18.539	0	0	0	0	0	0	0	0	0	0	0	0	0	0	0	0	0	0	0	0	0	0	0	0	0	0	0	0.000187175	0.000232763	7.37912e-05
94	0.000672428	16.193	16.199	0	0	0	0	0	0	0	0	0	0	0	0	0	0	0	0	0	0	0	0	0	0	0	0	0	0	0	0.00016773	0.000162028	0.00016346
111	0.000672428	20.637	20.642	0	0	0	0	0	0	0	0	0	0	0	0	0	0	0	0	0	0	0	0	0	0	0	0	0	0	0	0.000106479	0.00017688	0.000209483
111	0.000672428	15.103	15.121	0	0	0	0	0	0	0	0	0	0	0	0	0	0	0	0	0	0	0	0	0	0	0	0	0	0	0	0.000140099	0.000183309	0.000168059
80	0.000672428	16.193	16.199	0	0	0	0	0	0	0	0	0	0	0	0	0	0	0	0	0	0	0	0	0	0	0	0	0	0	0	0.000164927	0.000159777	0.000166593
95	0.000672428	17.939	17.946	0	0	0	0	0	0	0	0	0	0	0	0	0	0	0	0	0	0	0	0	0	0	0	0	0	0	0	0.000149065	0.000172239	0.000169683
131	0.000672428	28.017	28.02	0	0	0	0	0	0	0	0	0	0	0	0	0	0	0	0	0	0	0	0	0	0	0	0	0	0	0	0.000172205	0.000152763	0.000165738
112	0.000672428	9.588	9.594	0	0	0	0	0	0	0	0	0	0	0	0	0	0	0	0	0	0	0	0	0	0	0	0	0	0	0	0.000170389	0.000142467	0.00017424
81	0.000672428	5.346	5.35	0	0	0	0	0	0	0	0	0	0	0	0	0	0	0	0	0	0	0	0	0	0	0	0	0	0	0	0.000177222	0.000163352	0.000145831
51	0.000672428	21.685	21.704	0	0	0	0	0	0	0	0	0	0	0	0	0	0	0	0	0	0	0	0	0	0	0	0	0	0	0	0.000172444	0.000173288	0.000137828
113	0.000672428	18.517	18.539	0	0	0	0	0	0	0	0	0	0	0	0	0	0	0	0	0	0	0	0	0	0	0	0	0	0	0	0.000186459	0.000229205	6.75826e-05
95	0.000672428	3.77	3.79	0	0	0	0	0	0	0	0	0	0	0	0	0	0	0	0	0	0	0	0	0	0	0	0	0	0	0	0.000152409	0.000213992	0.000116796
83	0.000672428	18.457	18.46	0	0	0	0	0	0	0	0	0	0	0	0	0	0	0	0	0	0	0	0	0	0	0	0	0	0	0	0.000160356	0.000162149	0.000160085
59	0.000672428	9.75	9.786	0	0	0	0	0	0	0	0	0	0	0	0	0	0	0	0	0	0	0	0	0	0	0	0	0	0	0	0.000156502	0.000285759	3.69668e-05
54	0.000672428	9.746	9.773	0	0	0	0	0	0	0	0	0	0	0	0	0	0	0	0	0	0	0	0	0	0	0	0	0	0	0	0.000156407	0.000187778	0.000132574
66	0.000672428	21.685	21.704	0	0	0	0	0	0	0	0	0	0	0	0	0	0	0	0	0	0	0	0	0	0	0	0	0	0	0	0.000173208	0.000170245	0.000132232
72	0.000672428	3.582	3.613	0	0	0	0	0	0	0	0	0	0	0	0	0	0	0	0	0	0	0	0	0	0	0	0	0	0	0	0.000125192	0.000117198	0.000232424
68	0.000672428	14.912	14.921	0	0	0	0	0	0	0	0	0	0	0	0	0	0	0	0	0	0	0	0	0	0	0	0	0	0	0	0.000180709	0.000161496	0.000132417
57	0.000672428	20.227	20.229	0	0	0	0	0	0	0	0	0	0	0	0	0	0	0	0	0	0	0	0	0	0	0	0	0	0	0	0.000118121	0.000123507	0.000232965
51	0.000672428	28.017	28.02	0	0	0	0	0	0	0	0	0	0	0	0	0	0	0	0	0	0	0	0	0	0	0	0	0	0	0	0.000165437	0.000152007	0.000156696
77	0.000672428	13.672	13.774	0	0	0	0	0	0	0	0	0	0	0	0	0	0	0	0	0	0	0	0	0	0	0	0	0	0	0	0.000150148	0.000176141	0.000147326
58	0.000672428	29.102	29.107	0	0	0	0	0	0	0	0	0	0	0	0	0	0	0	0	0	0	0	0	0	0	0	0	0	0	0	0.000149256	0.000151646	0.000169369
87	0.000672428	2.499	2.504	0	0	0	0	0	0	0	0	0	0	0	0	0	0	0	0	0	0	0	0	0	0	0	0	0	0	0	0.000181713	0.000152076	0.000135607
55	0.000672428	15.103	15.121	0	0	0	0	0	0	0	0	0	0	0	0	0	0	0	0	0	0	0	0	0	0	0	0	0	0	0	0.000136754	0.000175213	0.00015728
61	0.000672428	14.023	14.057	0	0	0	0	0	0	0	0	0	0	0	0	0	0	0	0	0	0	0	0	0	0	0	0	0	0	0	9.78318e-05	0.000210864	0.000160128
89	0.000672428	28.017	28.02	0	0	0	0	0	0	0	0	0	0	0	0	0	0	0	0	0	0	0	0	0	0	0	0	0	0	0	0.000156693	0.000154878	0.00015493
55	0.000672428	4.567	4.67	0	0	0	0	0	0	0	0	0	0	0	0	0	0	0	0	0	0	0	0	0	0	0	0	0	0	0	0.000132279	0.000251414	7.98147e-05
63	0.000672428	15.65	15.655	0	0	0	0	0	0	0	0	0	0	0	0	0	0	0	0	0	0	0	0	0	0	0	0	0	0	0	0.000166376	0.000148363	0.000148138
106	0.000672428	8.113	8.148	0	0	0	0	0	0	0	0	0	0	0	0	0	0	0	0	0	0	0	0	0	0	0	0	0	0	0	0.000108152	0.000241117	0.000109234
53	0.000672428	8.415	8.435	0	0	0	0	0	0	0	0	0	0	0	0	0	0	0	0	0	0	0	0	0	0	0	0	0	0	0	0.000231544	9.03309e-05	0.000134453
71	0.000672428	9.588	9.66	0	0	0	0	0	0	0	0	0	0	0	0	0	0	0	0	0	0	0	0	0	0	0	0	0	0	0	0.000170358	0.00014202	0.00014267
91	0.000672428	37.354	37.356	0	0	0	0	0	0	0	0	0	0	0	0	0	0	0	0	0	0	0	0	0	0	0	0	0	0	0	9.15252e-05	0.000175763	0.000186813
65	0.000672428	28.017	28.02	0	0	0	0	0	0	0	0	0	0	0	0	0	0	0	0	0	0	0	0	0	0	0	0	0	0	0	0.000155722	0.000152712	0.000145603
128	0.000672428	28.017	28.02	0	0	0	0	0	0	0	0	0	0	0	0	0	0	0	0	0	0	0	0	0	0	0	0	0	0	0	0.000161105	0.000134921	0.000155443
105	0.000672428	10.755	10.78	0	0	0	0	0	0	0	0	0	0	0	0	0	0	0	0	0	0	0	0	0	0	0	0	0	0	0	0.000106304	0.000192695	0.000142798
82	0.000672428	16.193	16.199	0	0	0	0	0	0	0	0	0	0	0	0	0	0	0	0	0	0	0	0	0	0	0	0	0	0	0	0.000149065	0.000143481	0.000144037
102	0.000672428	28.017	28.02	0	0	0	0	0	0	0	0	0	0	0	0	0	0	0	0	0	0	0	0	0	0	0	0	0	0	0	0.000162506	0.000111835	0.000160313
115	0.000672428	25.576	25.578	0	0	0	0	0	0	0	0	0	0	0	0	0	0	0	0	0	0	0	0	0	0	0	0	0	0	0	0.00011484	0.00012844	0.00018932
83	0.000672428	2.411	2.484	0	0	0	0	0	0	0	0	0	0	0	0	0	0	0	0	0	0	0	0	0	0	0	0	0	0	0	0.000157617	0.00014752	0.000127447
58	0.000672428	17.698	17.699	0	0	0	0	0	0	0	0	0	0	0	0	0	0	0	0	0	0	0	0	0	0	0	0	0	0	0	0.000148396	0.000145956	0.000137344
105	0.000672428	22.92	22.955	0	0	0	0	0	0	0	0	0	0	0	0	0	0	0	0	0	0	0	0	0	0	0	0	0	0	0	9.66374e-05	0.000150701	0.000180647
51	0.000672428	13.672	13.774	0	0	0	0	0	0	0	0	0	0	0	0	0	0	0	0	0	0	0	0	0	0	0	0	0	0	0	0.00011742	0.000164521	0.000144848
67	0.000672428	8.415	8.421	0	0	0	0	0	0	0	0	0	0	0	0	0	0	0	0	0	0	0	0	0	0	0	0	0	0	0	0.000151947	0.000122939	0.000150971
143	0.000672428	28.017	28.02	0	0	0	0	0	0	0	0	0	0	0	0	0	0	0	0	0	0	0	0	0	0	0	0	0	0	0	0.000166758	8.78385e-05	0.000167205
116	0.000672428	21.659	21.704	0	0	0	0	0	0	0	0	0	0	0	0	0	0	0	0	0	0	0	0	0	0	0	0	0	0	0	0.000160595	9.30984e-05	0.000165995
152	0.000672428	27.024	27.028	0	0	0	0	0	0	0	0	0	0	0	0	0	0	0	0	0	0	0	0	0	0	0	0	0	0	0	0.00012911	0.000140284	0.000149448
67	0.000672428	14.912	14.921	0	0	0	0	0	0	0	0	0	0	0	0	0	0	0	0	0	0	0	0	0	0	0	0	0	0	0	0.000160181	0.000145286	0.000112794
151	0.000672428	28.017	28.05	0	0	0	0	0	0	0	0	0	0	0	0	0	0	0	0	0	0	0	0	0	0	0	0	0	0	0	0.000154448	7.13021e-05	0.000187354
68	0.000672428	7.101	7.118	0	0	0	0	0	0	0	0	0	0	0	0	0	0	0	0	0	0	0	0	0	0	0	0	0	0	0	0.000152154	0.000118762	0.000142029
56	0.000672428	9.746	9.75	0	0	0	0	0	0	0	0	0	0	0	0	0	0	0	0	0	0	0	0	0	0	0	0	0	0	0	0.000155021	0.000124057	0.000133157
83	0.000672428	5.346	5.35	0	0	0	0	0	0	0	0	0	0	0	0	0	0	0	0	0	0	0	0	0	0	0	0	0	0	0	0.000150005	0.000140163	0.00012111
55	0.000672428	11.806	11.869	0	0	0	0	0	0	0	0	0	0	0	0	0	0	0	0	0	0	0	0	0	0	0	0	0	0	0	8.28935e-05	8.26472e-05	0.000244058
85	0.000672428	14.912	14.921	0	0	0	0	0	0	0	0	0	0	0	0	0	0	0	0	0	0	0	0	0	0	0	0	0	0	0	0.000146358	0.000143962	0.000116824
79	0.000672428	17.698	17.699	0	0	0	0	0	0	0	0	0	0	0	0	0	0	0	0	0	0	0	0	0	0	0	0	0	0	0	0.000129381	0.000135505	0.00014163
116	0.000672428	37.354	37.356	0	0	0	0	0	0	0	0	0	0	0	0	0	0	0	0	0	0	0	0	0	0	0	0	0	0	0	6.91973e-05	0.000158333	0.000177387
68	0.000672428	11.868	11.869	0	0	0	0	0	0	0	0	0	0	0	0	0	0	0	0	0	0	0	0	0	0	0	0	0	0	0	0.000123743	0.000129248	0.000151541
173	0.000672428	37.354	37.356	0	0	0	0	0	0	0	0	0	0	0	0	0	0	0	0	0	0	0	0	0	0	0	0	0	0	0	7.95331e-05	0.000154706	0.00016964
119	0.000672428	23.872	23.875	0	0	0	0	0	0	0	0	0	0	0	0	0	0	0	0	0	0	0	0	0	0	0	0	0	0	0	0.000120701	0.00015407	0.000128287
95	0.000672428	10.327	10.33	0	0	0	0	0	0	0	0	0	0	0	0	0	0	0	0	0	0	0	0	0	0	0	0	0	0	0	0.000146915	0.000134663	0.000120754
63	0.000672428	12.862	12.889	0	0	0	0	0	0	0	0	0	0	0	0	0	0	0	0	0	0	0	0	0	0	0	0	0	0	0	0.000155276	0.000105269	0.000138455
68	0.000672428	4.642	4.67	0	0	0	0	0	0	0	0	0	0	0	0	0	0	0	0	0	0	0	0	0	0	0	0	0	0	0	0.000130368	0.000201839	6.64292e-05
55	0.000672428	20.227	20.229	0	0	0	0	0	0	0	0	0	0	0	0	0	0	0	0	0	0	0	0	0	0	0	0	0	0	0	0.000101065	0.000104822	0.000191925
84	0.000672428	20.071	20.083	0	0	0	0	0	0	0	0	0	0	0	0	0	0	0	0	0	0	0	0	0	0	0	0	0	0	0	0.000152091	0.000159484	8.51262e-05
132	0.000672428	14.039	14.049	0	0	0	0	0	0	0	0	0	0	0	0	0	0	0	0	0	0	0	0	0	0	0	0	0	0	0	0.00011957	0.000160585	0.000116312
71	0.000672428	12.475	12.483	0	0	0	0	0	0	0	0	0	0	0	0	0	0	0	0	0	0	0	0	0	0	0	0	0	0	0	0.000112722	0.000120069	0.000163232
70	0.000672428	8.265	8.277	0	0	0	0	0	0	0	0	0	0	0	0	0	0	0	0	0	0	0	0	0	0	0	0	0	0	0	0.00014666	0.000117594	0.000130964
101	0.000672428	19.585	19.589	0	0	0	0	0	0	0	0	0	0	0	0	0	0	0	0	0	0	0	0	0	0	0	0	0	0	0	0.00012266	0.000138891	0.000133471
79	0.000672428	16.07	16.076	0	0	0	0	0	0	0	0	0	0	0	0	0	0	0	0	0	0	0	0	0	0	0	0	0	0	0	0.000152728	0.000103343	0.000138868
94	0.000672428	16.07	16.076	0	0	0	0	0	0	0	0	0	0	0	0	0	0	0	0	0	0	0	0	0	0	0	0	0	0	0	0.000150944	0.000104959	0.000138099
103	0.000672428	22.53	22.536	0	0	0	0	0	0	0	0	0	0	0	0	0	0	0	0	0	0	0	0	0	0	0	0	0	0	0	0.000114076	0.000130709	0.000148152
132	0.000672428	37.354	37.356	0	0	0	0	0	0	0	0	0	0	0	0	0	0	0	0	0	0	0	0	0	0	0	0	0	0	0	7.73354e-05	0.000150185	0.000165397
86	0.000672428	12.029	12.035	0	0	0	0	0	0	0	0	0	0	0	0	0	0	0	0	0	0	0	0	0	0	0	0	0	0	0	7.2048e-05	0.000109755	0.000209626
91	0.000672428	17.252	17.258	0	0	0	0	0	0	0	0	0	0	0	0	0	0	0	0	0	0	0	0	0	0	0	0	0	0	0	0.000113965	0.000129747	0.000147041
52	0.000672428	3.747	3.754	0	0	0	0	0	0	0	0	0	0	0	0	0	0	0	0	0	0	0	0	0	0	0	0	0	0	0	0.000139	0.000122905	0.000126379
98	0.000672428	14.293	14.307	0	0	0	0	0	0	0	0	0	0	0	0	0	0	0	0	0	0	0	0	0	0	0	0	0	0	0	0.000144255	0.000124813	0.000117536
68	0.000672428	16.856	16.924	0	0	0	0	0	0	0	0	0	0	0	0	0	0	0	0	0	0	0	0	0	0	0	0	0	0	0	0.000142918	0.000180988	6.26698e-05
52	0.000672428	15.65	15.655	0	0	0	0	0	0	0	0	0	0	0	0	0	0	0	0	0	0	0	0	0	0	0	0	0	0	0	0.000133681	0.000125071	0.000126963
93	0.000672428	17.698	17.699	0	0	0	0	0	0	0	0	0	0	0	0	0	0	0	0	0	0	0	0	0	0	0	0	0	0	0	0.000133505	0.000130073	0.000121623
78	0.000672428	16.193	16.199	0	0	0	0	0	0	0	0	0	0	0	0	0	0	0	0	0	0	0	0	0	0	0	0	0	0	0	0.00012704	0.00013009	0.000124799
136	0.000672428	16.07	16.076	0	0	0	0	0	0	0	0	0	0	0	0	0	0	0	0	0	0	0	0	0	0	0	0	0	0	0	0.000140752	0.000103481	0.000137287
79	0.000672428	1.965	2.085	0	0	0	0	0	0	0	0	0	0	0	0	0	0	0	0	0	0	0	0	0	0	0	0	0	0	0	0.000188401	8.93511e-05	0.00010361
121	0.000672428	19.036	19.036	0	0	0	0	0	0	0	0	0	0	0	0	0	0	0	0	0	0	0	0	0	0	0	0	0	0	0	0.000126371	0.000129643	0.000122648
53	0.000672428	17.698	17.699	0	0	0	0	0	0	0	0	0	0	0	0	0	0	0	0	0	0	0	0	0	0	0	0	0	0	0	0.000124921	0.000126515	0.000126878
51	0.000672428	17.946	17.988	0	0	0	0	0	0	0	0	0	0	0	0	0	0	0	0	0	0	0	0	0	0	0	0	0	0	0	0.000148046	0.000100524	0.00012974
99	0.000672428	20.077	20.156	0	0	0	0	0	0	0	0	0	0	0	0	0	0	0	0	0	0	0	0	0	0	0	0	0	0	0	9.50767e-05	0.000165243	0.000115457
53	0.000672428	14.102	14.111	0	0	0	0	0	0	0	0	0	0	0	0	0	0	0	0	0	0	0	0	0	0	0	0	0	0	0	0.000155706	9.06575e-05	0.000128999
133	0.000672428	28.017	28.05	0	0	0	0	0	0	0	0	0	0	0	0	0	0	0	0	0	0	0	0	0	0	0	0	0	0	0	9.62711e-05	6.17791e-05	0.000213599
100	0.000672428	7.114	7.179	0	0	0	0	0	0	0	0	0	0	0	0	0	0	0	0	0	0	0	0	0	0	0	0	0	0	0	0.000124906	0.000121513	0.000123859
70	0.000672428	12.029	12.035	0	0	0	0	0	0	0	0	0	0	0	0	0	0	0	0	0	0	0	0	0	0	0	0	0	0	0	7.17295e-05	0.000109875	0.000188608
149	0.000672428	26.095	26.102	0	0	0	0	0	0	0	0	0	0	0	0	0	0	0	0	0	0	0	0	0	0	0	0	0	0	0	0.000149925	0.000118247	0.000100989
70	0.000672428	1.802	2.006	0	0	0	0	0	0	0	0	0	0	0	0	0	0	0	0	0	0	0	0	0	0	0	0	0	0	0	9.92333e-05	0.000170675	9.84405e-05
132	0.000672428	20.071	20.083	0	0	0	0	0	0	0	0	0	0	0	0	0	0	0	0	0	0	0	0	0	0	0	0	0	0	0	0.000153476	0.000137568	7.36061e-05
121	0.000672428	16.07	16.076	0	0	0	0	0	0	0	0	0	0	0	0	0	0	0	0	0	0	0	0	0	0	0	0	0	0	0	0.000142902	9.21186e-05	0.00012937
69	0.000672428	5.329	5.35	0	0	0	0	0	0	0	0	0	0	0	0	0	0	0	0	0	0	0	0	0	0	0	0	0	0	0	0.000136929	0.00011988	0.000105318
57	0.000672428	17.004	17.013	0	0	0	0	0	0	0	0	0	0	0	0	0	0	0	0	0	0	0	0	0	0	0	0	0	0	0	8.91364e-05	0.000114052	0.000158932
53	0.000672428	15.65	15.655	0	0	0	0	0	0	0	0	0	0	0	0	0	0	0	0	0	0	0	0	0	0	0	0	0	0	0	0.000128744	0.000117972	0.000115044
92	0.000672428	16.193	16.199	0	0	0	0	0	0	0	0	0	0	0	0	0	0	0	0	0	0	0	0	0	0	0	0	0	0	0	0.000120972	0.0001167	0.000122449
54	0.000672428	8.274	8.286	0	0	0	0	0	0	0	0	0	0	0	0	0	0	0	0	0	0	0	0	0	0	0	0	0	0	0	0.000132821	0.000106541	0.000119573
71	0.000672428	22.92	22.924	0	0	0	0	0	0	0	0	0	0	0	0	0	0	0	0	0	0	0	0	0	0	0	0	0	0	0	0.000104075	0.000112952	0.000141502
71	0.000672428	18.517	18.539	0	0	0	0	0	0	0	0	0	0	0	0	0	0	0	0	0	0	0	0	0	0	0	0	0	0	0	0.000132391	0.000160585	6.51049e-05
77	0.000672428	14.245	14.316	0	0	0	0	0	0	0	0	0	0	0	0	0	0	0	0	0	0	0	0	0	0	0	0	0	0	0	9.17004e-05	8.71165e-05	0.000178426
102	0.000672428	9.746	9.786	0	0	0	0	0	0	0	0	0	0	0	0	0	0	0	0	0	0	0	0	0	0	0	0	0	0	0	0.000121752	0.000185045	4.85723e-05
103	0.000672428	37.354	37.356	0	0	0	0	0	0	0	0	0	0	0	0	0	0	0	0	0	0	0	0	0	0	0	0	0	0	0	6.72066e-05	0.000138135	0.000149533
69	0.000672428	6.393	6.399	0	0	0	0	0	0	0	0	0	0	0	0	0	0	0	0	0	0	0	0	0	0	0	0	0	0	0	9.55226e-05	0.000103395	0.000155856
87	0.000672428	20.063	20.077	0	0	0	0	0	0	0	0	0	0	0	0	0	0	0	0	0	0	0	0	0	0	0	0	0	0	0	0.000139812	0.000139802	7.44035e-05
53	0.000672428	7.099	7.123	0	0	0	0	0	0	0	0	0	0	0	0	0	0	0	0	0	0	0	0	0	0	0	0	0	0	0	0.000135496	0.000100352	0.000116297
97	0.000672428	9.588	9.594	0	0	0	0	0	0	0	0	0	0	0	0	0	0	0	0	0	0	0	0	0	0	0	0	0	0	0	0.000125049	0.000100284	0.000125482
84	0.000672428	21.659	21.689	0	0	0	0	0	0	0	0	0	0	0	0	0	0	0	0	0	0	0	0	0	0	0	0	0	0	0	0.000153094	9.62785e-05	0.000101431
52	0.000672428	9.098	9.109	0	0	0	0	0	0	0	0	0	0	0	0	0	0	0	0	0	0	0	0	0	0	0	0	0	0	0	0.000118822	0.000110322	0.000120697
63	0.000672428	28.017	28.02	0	0	0	0	0	0	0	0	0	0	0	0	0	0	0	0	0	0	0	0	0	0	0	0	0	0	0	0.000122389	9.32703e-05	0.000132887
83	0.000672428	11.54	11.544	0	0	0	0	0	0	0	0	0	0	0	0	0	0	0	0	0	0	0	0	0	0	0	0	0	0	0	8.1062e-05	0.00010936	0.000157835
81	0.000672428	14.102	14.111	0	0	0	0	0	0	0	0	0	0	0	0	0	0	0	0	0	0	0	0	0	0	0	0	0	0	0	0.00013892	8.95574e-05	0.00011916
71	0.000672428	4.632	4.661	0	0	0	0	0	0	0	0	0	0	0	0	0	0	0	0	0	0	0	0	0	0	0	0	0	0	0	7.55676e-05	0.000140473	0.000129612
81	0.000672428	25.323	25.348	0	0	0	0	0	0	0	0	0	0	0	0	0	0	0	0	0	0	0	0	0	0	0	0	0	0	0	0.000165819	0.000110838	6.80668e-05
124	0.000672428	17.939	17.946	0	0	0	0	0	0	0	0	0	0	0	0	0	0	0	0	0	0	0	0	0	0	0	0	0	0	0	0.0001046	0.000118625	0.000121466
87	0.000672428	11.806	11.813	0	0	0	0	0	0	0	0	0	0	0	0	0	0	0	0	0	0	0	0	0	0	0	0	0	0	0	8.33075e-05	0.000124658	0.000135934
55	0.000672428	30.901	30.905	0	0	0	0	0	0	0	0	0	0	0	0	0	0	0	0	0	0	0	0	0	0	0	0	0	0	0	7.42458e-05	0.000149532	0.000120028
86	0.000672428	21.188	21.191	0	0	0	0	0	0	0	0	0	0	0	0	0	0	0	0	0	0	0	0	0	0	0	0	0	0	0	9.522e-05	0.000139115	0.000108551
53	0.000672428	14.912	14.921	0	0	0	0	0	0	0	0	0	0	0	0	0	0	0	0	0	0	0	0	0	0	0	0	0	0	0	9.56341e-05	0.00013303	0.000111527
56	0.000672428	8.089	8.133	0	0	0	0	0	0	0	0	0	0	0	0	0	0	0	0	0	0	0	0	0	0	0	0	0	0	0	0.000142296	9.9682e-05	9.8113e-05
100	0.000672428	21.678	21.689	0	0	0	0	0	0	0	0	0	0	0	0	0	0	0	0	0	0	0	0	0	0	0	0	0	0	0	0.000122867	0.000119347	9.72301e-05
56	0.000672428	17.004	17.03	0	0	0	0	0	0	0	0	0	0	0	0	0	0	0	0	0	0	0	0	0	0	0	0	0	0	0	6.98503e-05	0.000147881	0.000121438
89	0.000672428	15.65	15.655	0	0	0	0	0	0	0	0	0	0	0	0	0	0	0	0	0	0	0	0	0	0	0	0	0	0	0	0.000108566	0.000119983	0.000110074
79	0.000672428	17.252	17.258	0	0	0	0	0	0	0	0	0	0	0	0	0	0	0	0	0	0	0	0	0	0	0	0	0	0	0	0.000115398	0.000104203	0.000118633
71	0.000672428	16.958	17.013	0	0	0	0	0	0	0	0	0	0	0	0	0	0	0	0	0	0	0	0	0	0	0	0	0	0	0	0.000103533	0.00011101	0.000123303
121	0.000672428	20.153	20.156	0	0	0	0	0	0	0	0	0	0	0	0	0	0	0	0	0	0	0	0	0	0	0	0	0	0	0	6.66333e-05	0.000121478	0.000148408
109	0.000672428	14.307	14.322	0	0	0	0	0	0	0	0	0	0	0	0	0	0	0	0	0	0	0	0	0	0	0	0	0	0	0	0.000102275	0.000103515	0.000129498
110	0.000672428	16.193	16.199	0	0	0	0	0	0	0	0	0	0	0	0	0	0	0	0	0	0	0	0	0	0	0	0	0	0	0	0.00011148	0.000112935	0.000110858
53	0.000672428	30.901	30.905	0	0	0	0	0	0	0	0	0	0	0	0	0	0	0	0	0	0	0	0	0	0	0	0	0	0	0	7.20162e-05	0.000146713	0.000113905
57	0.000672428	18.457	18.46	0	0	0	0	0	0	0	0	0	0	0	0	0	0	0	0	0	0	0	0	0	0	0	0	0	0	0	0.000108072	0.000109618	0.000113848
73	0.000672428	14.95	15.008	0	0	0	0	0	0	0	0	0	0	0	0	0	0	0	0	0	0	0	0	0	0	0	0	0	0	0	0.000120415	0.000128526	8.1851e-05
69	0.000672428	14.129	14.135	0	0	0	0	0	0	0	0	0	0	0	0	0	0	0	0	0	0	0	0	0	0	0	0	0	0	0	0.000117707	8.82854e-05	0.0001242
71	0.000672428	2.783	2.795	0	0	0	0	0	0	0	0	0	0	0	0	0	0	0	0	0	0	0	0	0	0	0	0	0	0	0	0.00012145	9.99571e-05	0.000108195
55	0.000672428	21.188	21.191	0	0	0	0	0	0	0	0	0	0	0	0	0	0	0	0	0	0	0	0	0	0	0	0	0	0	0	9.26559e-05	0.000133734	0.000102542
74	0.000672428	13.662	13.77	0	0	0	0	0	0	0	0	0	0	0	0	0	0	0	0	0	0	0	0	0	0	0	0	0	0	0	0.000107594	8.99356e-05	0.00013105
80	0.000672428	17.252	17.258	0	0	0	0	0	0	0	0	0	0	0	0	0	0	0	0	0	0	0	0	0	0	0	0	0	0	0	0.000111735	0.00010257	0.00011325
85	0.000672428	20.354	20.364	0	0	0	0	0	0	0	0	0	0	0	0	0	0	0	0	0	0	0	0	0	0	0	0	0	0	0	8.63493e-05	9.19983e-05	0.000148038
67	0.000672428	16.937	16.941	0	0	0	0	0	0	0	0	0	0	0	0	0	0	0	0	0	0	0	0	0	0	0	0	0	0	0	0.000121896	9.89944e-05	0.000104977
68	0.000672428	13.293	13.295	0	0	0	0	0	0	0	0	0	0	0	0	0	0	0	0	0	0	0	0	0	0	0	0	0	0	0	0.000122564	8.20284e-05	0.000119188
69	0.000672428	7.908	7.961	0	0	0	0	0	0	0	0	0	0	0	0	0	0	0	0	0	0	0	0	0	0	0	0	0	0	0	0.000101431	0.000168423	5.36702e-05
59	0.000672428	9.254	9.261	0	0	0	0	0	0	0	0	0	0	0	0	0	0	0	0	0	0	0	0	0	0	0	0	0	0	0	9.66374e-05	8.7976e-05	0.000138512
112	0.000672428	11.868	11.869	0	0	0	0	0	0	0	0	0	0	0	0	0	0	0	0	0	0	0	0	0	0	0	0	0	0	0	0.0001021	9.99743e-05	0.000120897
113	0.000672428	28.017	28.02	0	0	0	0	0	0	0	0	0	0	0	0	0	0	0	0	0	0	0	0	0	0	0	0	0	0	0	0.00013513	5.66567e-05	0.000131121
95	0.000672428	12.475	12.483	0	0	0	0	0	0	0	0	0	0	0	0	0	0	0	0	0	0	0	0	0	0	0	0	0	0	0	8.33712e-05	9.01075e-05	0.000146514
72	0.000672428	10.648	10.808	0	0	0	0	0	0	0	0	0	0	0	0	0	0	0	0	0	0	0	0	0	0	0	0	0	0	0	0.000141994	0.000105114	7.23957e-05
54	0.000672428	14.245	14.322	0	0	0	0	0	0	0	0	0	0	0	0	0	0	0	0	0	0	0	0	0	0	0	0	0	0	0	9.07608e-05	8.34207e-05	0.000141929
97	0.000672428	15.103	15.121	0	0	0	0	0	0	0	0	0	0	0	0	0	0	0	0	0	0	0	0	0	0	0	0	0	0	0	9.14934e-05	0.000115823	0.00010801
114	0.000672428	20.083	20.101	0	0	0	0	0	0	0	0	0	0	0	0	0	0	0	0	0	0	0	0	0	0	0	0	0	0	0	0.000106862	0.000108861	9.92806e-05
83	0.000672428	15.103	15.121	0	0	0	0	0	0	0	0	0	0	0	0	0	0	0	0	0	0	0	0	0	0	0	0	0	0	0	7.87528e-05	9.25828e-05	0.000140249
123	0.000672428	22.92	22.924	0	0	0	0	0	0	0	0	0	0	0	0	0	0	0	0	0	0	0	0	0	0	0	0	0	0	0	0.000105683	9.02622e-05	0.000115628
84	0.000672428	16.302	16.306	0	0	0	0	0	0	0	0	0	0	0	0	0	0	0	0	0	0	0	0	0	0	0	0	0	0	0	0.000115462	0.000104065	9.15768e-05
55	0.000672428	11.234	11.255	0	0	0	0	0	0	0	0	0	0	0	0	0	0	0	0	0	0	0	0	0	0	0	0	0	0	0	9.60322e-05	9.86507e-05	0.000116141
107	0.000672428	16.07	16.076	0	0	0	0	0	0	0	0	0	0	0	0	0	0	0	0	0	0	0	0	0	0	0	0	0	0	0	0.000115079	8.01891e-05	0.000114532
128	0.000672428	14.322	14.338	0	0	0	0	0	0	0	0	0	0	0	0	0	0	0	0	0	0	0	0	0	0	0	0	0	0	0	9.48537e-05	8.45037e-05	0.000129854
69	0.000672428	19.585	19.589	0	0	0	0	0	0	0	0	0	0	0	0	0	0	0	0	0	0	0	0	0	0	0	0	0	0	0	0.000138188	0.000105097	6.58311e-05
84	0.000672428	31.153	31.162	0	0	0	0	0	0	0	0	0	0	0	0	0	0	0	0	0	0	0	0	0	0	0	0	0	0	0	0.000103979	0.000124091	8.08542e-05
55	0.000672428	7.728	7.732	0	0	0	0	0	0	0	0	0	0	0	0	0	0	0	0	0	0	0	0	0	0	0	0	0	0	0	9.68285e-05	0.000109807	0.000101915
92	0.000672428	16.07	16.076	0	0	0	0	0	0	0	0	0	0	0	0	0	0	0	0	0	0	0	0	0	0	0	0	0	0	0	0.000117054	8.31973e-05	0.000107041
100	0.000672428	12.59	12.685	0	0	0	0	0	0	0	0	0	0	0	0	0	0	0	0	0	0	0	0	0	0	0	0	0	0	0	8.59831e-05	0.000112007	0.000108124
63	0.000672428	16.193	16.199	0	0	0	0	0	0	0	0	0	0	0	0	0	0	0	0	0	0	0	0	0	0	0	0	0	0	0	0.000110365	0.000108019	8.73476e-05
84	0.000672428	12.475	12.483	0	0	0	0	0	0	0	0	0	0	0	0	0	0	0	0	0	0	0	0	0	0	0	0	0	0	0	9.94244e-05	0.000110735	9.4197e-05
121	0.000672428	14.57	14.574	0	0	0	0	0	0	0	0	0	0	0	0	0	0	0	0	0	0	0	0	0	0	0	0	0	0	0	9.737e-05	0.000111801	9.48235e-05
51	0.000672428	9.75	9.786	0	0	0	0	0	0	0	0	0	0	0	0	0	0	0	0	0	0	0	0	0	0	0	0	0	0	0	9.56022e-05	0.000160499	4.6536e-05
51	0.000672428	10.327	10.33	0	0	0	0	0	0	0	0	0	0	0	0	0	0	0	0	0	0	0	0	0	0	0	0	0	0	0	0.000117914	0.000100507	8.18652e-05
97	0.000672428	20.637	20.642	0	0	0	0	0	0	0	0	0	0	0	0	0	0	0	0	0	0	0	0	0	0	0	0	0	0	0	6.4547e-05	0.00010795	0.000127518
73	0.000672428	5.346	5.35	0	0	0	0	0	0	0	0	0	0	0	0	0	0	0	0	0	0	0	0	0	0	0	0	0	0	0	0.000119379	8.93855e-05	9.03949e-05
77	0.000672428	8.415	8.421	0	0	0	0	0	0	0	0	0	0	0	0	0	0	0	0	0	0	0	0	0	0	0	0	0	0	0	0.000112611	8.32317e-05	0.000103125
111	0.000672428	13.648	13.662	0	0	0	0	0	0	0	0	0	0	0	0	0	0	0	0	0	0	0	0	0	0	0	0	0	0	0	9.83733e-05	8.43318e-05	0.000115728
62	0.000672428	7.026	7.05	0	0	0	0	0	0	0	0	0	0	0	0	0	0	0	0	0	0	0	0	0	0	0	0	0	0	0	6.48178e-05	7.82295e-05	0.000153392
105	0.000672428	14.242	14.246	0	0	0	0	0	0	0	0	0	0	0	0	0	0	0	0	0	0	0	0	0	0	0	0	0	0	0	8.53142e-05	0.000101676	0.000107853
55	0.000672428	16.779	16.784	0	0	0	0	0	0	0	0	0	0	0	0	0	0	0	0	0	0	0	0	0	0	0	0	0	0	0	9.5857e-05	0.000107056	9.1705e-05
77	0.000672428	3.754	3.79	0	0	0	0	0	0	0	0	0	0	0	0	0	0	0	0	0	0	0	0	0	0	0	0	0	0	0	9.59526e-05	0.000120791	7.75505e-05
63	0.000672428	9.896	9.921	0	0	0	0	0	0	0	0	0	0	0	0	0	0	0	0	0	0	0	0	0	0	0	0	0	0	0	0.000164879	6.67125e-05	6.09753e-05
55	0.000672428	3.991	4.061	0	0	0	0	0	0	0	0	0	0	0	0	0	0	0	0	0	0	0	0	0	0	0	0	0	0	0	0.000120574	6.7572e-05	0.000104208
62	0.000672428	16.971	17.013	0	0	0	0	0	0	0	0	0	0	0	0	0	0	0	0	0	0	0	0	0	0	0	0	0	0	0	0.000106448	8.28879e-05	0.000101474
62	0.000672428	9.905	9.921	0	0	0	0	0	0	0	0	0	0	0	0	0	0	0	0	0	0	0	0	0	0	0	0	0	0	0	0.000105142	0.000115204	7.04021e-05
71	0.000672428	3.841	3.852	0	0	0	0	0	0	0	0	0	0	0	0	0	0	0	0	0	0	0	0	0	0	0	0	0	0	0	0.000100316	8.06532e-05	0.000104621
73	0.000672428	9.896	9.933	0	0	0	0	0	0	0	0	0	0	0	0	0	0	0	0	0	0	0	0	0	0	0	0	0	0	0	0.000103231	0.000131242	5.03666e-05
58	0.000672428	20.071	20.083	0	0	0	0	0	0	0	0	0	0	0	0	0	0	0	0	0	0	0	0	0	0	0	0	0	0	0	9.99977e-05	0.00012275	6.20148e-05
56	0.000672428	11.806	11.869	0	0	0	0	0	0	0	0	0	0	0	0	0	0	0	0	0	0	0	0	0	0	0	0	0	0	0	7.23188e-05	7.39837e-05	0.000137657
70	0.000672428	27.15	27.157	0	0	0	0	0	0	0	0	0	0	0	0	0	0	0	0	0	0	0	0	0	0	0	0	0	0	0	8.23998e-05	7.7456e-05	0.000123788
53	0.000672428	8.265	8.277	0	0	0	0	0	0	0	0	0	0	0	0	0	0	0	0	0	0	0	0	0	0	0	0	0	0	0	0.000103024	8.54835e-05	9.45957e-05
57	0.000672428	3.841	3.852	0	0	0	0	0	0	0	0	0	0	0	0	0	0	0	0	0	0	0	0	0	0	0	0	0	0	0	0.000103151	8.17534e-05	9.80275e-05
59	0.000672428	27.046	27.057	0	0	0	0	0	0	0	0	0	0	0	0	0	0	0	0	0	0	0	0	0	0	0	0	0	0	0	7.33062e-05	0.000115479	9.27018e-05
84	0.000672428	9.746	9.773	0	0	0	0	0	0	0	0	0	0	0	0	0	0	0	0	0	0	0	0	0	0	0	0	0	0	0	0.000106448	0.000124538	5.03523e-05
100	0.000672428	14.912	14.921	0	0	0	0	0	0	0	0	0	0	0	0	0	0	0	0	0	0	0	0	0	0	0	0	0	0	0	0.000100698	9.94586e-05	8.02988e-05
103	0.000672428	28.017	28.02	0	0	0	0	0	0	0	0	0	0	0	0	0	0	0	0	0	0	0	0	0	0	0	0	0	0	0	0.000110779	9.80146e-05	7.15128e-05
55	0.000672428	12.029	12.035	0	0	0	0	0	0	0	0	0	0	0	0	0	0	0	0	0	0	0	0	0	0	0	0	0	0	0	6.72544e-05	7.94156e-05	0.000132388
58	0.000672428	15.286	15.348	0	0	0	0	0	0	0	0	0	0	0	0	0	0	0	0	0	0	0	0	0	0	0	0	0	0	0	7.10288e-05	0.000117645	9.03665e-05
59	0.000672428	18.46	18.487	0	0	0	0	0	0	0	0	0	0	0	0	0	0	0	0	0	0	0	0	0	0	0	0	0	0	0	9.79751e-05	8.90933e-05	9.05943e-05
82	0.000672428	21.448	21.455	0	0	0	0	0	0	0	0	0	0	0	0	0	0	0	0	0	0	0	0	0	0	0	0	0	0	0	0.000105572	0.000112351	5.74438e-05
111	0.000672428	8.42	8.435	0	0	0	0	0	0	0	0	0	0	0	0	0	0	0	0	0	0	0	0	0	0	0	0	0	0	0	9.74177e-05	7.72153e-05	9.948e-05
71	0.000672428	13.453	13.499	0	0	0	0	0	0	0	0	0	0	0	0	0	0	0	0	0	0	0	0	0	0	0	0	0	0	0	8.30049e-05	0.000101006	8.96117e-05
69	0.000672428	20.637	20.642	0	0	0	0	0	0	0	0	0	0	0	0	0	0	0	0	0	0	0	0	0	0	0	0	0	0	0	5.83519e-05	9.85303e-05	0.00011671
74	0.000672428	11.806	11.813	0	0	0	0	0	0	0	0	0	0	0	0	0	0	0	0	0	0	0	0	0	0	0	0	0	0	0	5.96419e-05	9.71895e-05	0.000116141
68	0.000672428	21.188	21.191	0	0	0	0	0	0	0	0	0	0	0	0	0	0	0	0	0	0	0	0	0	0	0	0	0	0	0	7.73354e-05	0.000108397	8.45423e-05
98	0.000672428	3.515	3.537	0	0	0	0	0	0	0	0	0	0	0	0	0	0	0	0	0	0	0	0	0	0	0	0	0	0	0	8.85471e-05	8.22862e-05	9.81984e-05
91	0.000672428	16.07	16.076	0	0	0	0	0	0	0	0	0	0	0	0	0	0	0	0	0	0	0	0	0	0	0	0	0	0	0	0.000102323	6.86893e-05	9.75006e-05
51	0.000672428	14.302	14.322	0	0	0	0	0	0	0	0	0	0	0	0	0	0	0	0	0	0	0	0	0	0	0	0	0	0	0	0.000117723	6.67297e-05	8.27339e-05
57	0.000672428	17.439	17.442	0	0	0	0	0	0	0	0	0	0	0	0	0	0	0	0	0	0	0	0	0	0	0	0	0	0	0	9.41848e-05	0.000104856	6.75114e-05
65	0.000672428	3.747	3.754	0	0	0	0	0	0	0	0	0	0	0	0	0	0	0	0	0	0	0	0	0	0	0	0	0	0	0	9.81981e-05	8.79416e-05	7.98574e-05
86	0.000672428	10.362	10.488	0	0	0	0	0	0	0	0	0	0	0	0	0	0	0	0	0	0	0	0	0	0	0	0	0	0	0	0.000101447	8.25097e-05	8.17798e-05
103	0.000672428	20.227	20.229	0	0	0	0	0	0	0	0	0	0	0	0	0	0	0	0	0	0	0	0	0	0	0	0	0	0	0	6.3273e-05	6.77439e-05	0.000134624
138	0.000672428	22.92	22.924	0	0	0	0	0	0	0	0	0	0	0	0	0	0	0	0	0	0	0	0	0	0	0	0	0	0	0	9.28471e-05	7.68543e-05	9.40688e-05
65	0.000672428	10.327	10.33	0	0	0	0	0	0	0	0	0	0	0	0	0	0	0	0	0	0	0	0	0	0	0	0	0	0	0	9.88351e-05	8.96262e-05	7.42469e-05
99	0.000672428	13.648	13.662	0	0	0	0	0	0	0	0	0	0	0	0	0	0	0	0	0	0	0	0	0	0	0	0	0	0	0	7.87368e-05	7.96047e-05	0.000102513
73	0.000672428	7.908	7.938	0	0	0	0	0	0	0	0	0	0	0	0	0	0	0	0	0	0	0	0	0	0	0	0	0	0	0	0.000138777	6.48217e-05	5.71732e-05
95	0.000672428	30.901	30.905	0	0	0	0	0	0	0	0	0	0	0	0	0	0	0	0	0	0	0	0	0	0	0	0	0	0	0	5.66797e-05	0.000111663	9.07082e-05
91	0.000672428	9.178	9.192	0	0	0	0	0	0	0	0	0	0	0	0	0	0	0	0	0	0	0	0	0	0	0	0	0	0	0	8.32916e-05	8.91105e-05	8.64505e-05
51	0.000672428	5.346	5.35	0	0	0	0	0	0	0	0	0	0	0	0	0	0	0	0	0	0	0	0	0	0	0	0	0	0	0	0.000103517	8.64461e-05	6.88642e-05
52	0.000672428	16.193	16.199	0	0	0	0	0	0	0	0	0	0	0	0	0	0	0	0	0	0	0	0	0	0	0	0	0	0	0	8.66997e-05	8.83369e-05	8.31041e-05
70	0.000672428	14.102	14.111	0	0	0	0	0	0	0	0	0	0	0	0	0	0	0	0	0	0	0	0	0	0	0	0	0	0	0	0.000101558	6.77955e-05	8.79314e-05
71	0.000672428	12.029	12.035	0	0	0	0	0	0	0	0	0	0	0	0	0	0	0	0	0	0	0	0	0	0	0	0	0	0	0	5.29849e-05	7.70606e-05	0.00012712
87	0.000672428	21.188	21.191	0	0	0	0	0	0	0	0	0	0	0	0	0	0	0	0	0	0	0	0	0	0	0	0	0	0	0	6.94999e-05	0.000102398	8.51974e-05
69	0.000672428	9.588	9.66	0	0	0	0	0	0	0	0	0	0	0	0	0	0	0	0	0	0	0	0	0	0	0	0	0	0	0	9.19074e-05	7.82811e-05	8.64932e-05
79	0.000672428	3.75	3.852	0	0	0	0	0	0	0	0	0	0	0	0	0	0	0	0	0	0	0	0	0	0	0	0	0	0	0	0.000101049	4.62054e-05	0.000109405
139	0.000672428	14.307	14.322	0	0	0	0	0	0	0	0	0	0	0	0	0	0	0	0	0	0	0	0	0	0	0	0	0	0	0	7.97083e-05	7.76623e-05	9.91098e-05
86	0.000672428	8.089	8.113	0	0	0	0	0	0	0	0	0	0	0	0	0	0	0	0	0	0	0	0	0	0	0	0	0	0	0	6.23811e-05	9.46455e-05	9.91667e-05
54	0.000672428	17.698	17.699	0	0	0	0	0	0	0	0	0	0	0	0	0	0	0	0	0	0	0	0	0	0	0	0	0	0	0	8.25909e-05	8.27847e-05	8.94978e-05
66	0.000672428	9.746	9.786	0	0	0	0	0	0	0	0	0	0	0	0	0	0	0	0	0	0	0	0	0	0	0	0	0	0	0	6.69359e-05	8.52428e-05	0.000101858
73	0.000672428	8.274	8.286	0	0	0	0	0	0	0	0	0	0	0	0	0	0	0	0	0	0	0	0	0	0	0	0	0	0	0	7.55676e-05	0.000111388	6.56887e-05
122	0.000672428	14.549	14.574	0	0	0	0	0	0	0	0	0	0	0	0	0	0	0	0	0	0	0	0	0	0	0	0	0	0	0	5.94667e-05	7.18006e-05	0.000121068
121	0.000672428	14.46	14.489	0	0	0	0	0	0	0	0	0	0	0	0	0	0	0	0	0	0	0	0	0	0	0	0	0	0	0	9.36115e-05	0.000108707	4.9797e-05
96	0.000672428	14.316	14.325	0	0	0	0	0	0	0	0	0	0	0	0	0	0	0	0	0	0	0	0	0	0	0	0	0	0	0	8.69068e-05	6.43404e-05	0.000100847
59	0.000672428	16.474	16.495	0	0	0	0	0	0	0	0	0	0	0	0	0	0	0	0	0	0	0	0	0	0	0	0	0	0	0	6.37667e-05	6.88784e-05	0.000119117
59	0.000672428	16.924	16.958	0	0	0	0	0	0	0	0	0	0	0	0	0	0	0	0	0	0	0	0	0	0	0	0	0	0	0	0.000142965	4.59476e-05	6.28265e-05
60	0.000672428	11.234	11.257	0	0	0	0	0	0	0	0	0	0	0	0	0	0	0	0	0	0	0	0	0	0	0	0	0	0	0	4.22669e-05	7.18522e-05	0.000136077
76	0.000672428	28.017	28.054	0	0	0	0	0	0	0	0	0	0	0	0	0	0	0	0	0	0	0	0	0	0	0	0	0	0	0	7.2478e-05	0.000107864	6.96901e-05
114	0.000672428	9.254	9.261	0	0	0	0	0	0	0	0	0	0	0	0	0	0	0	0	0	0	0	0	0	0	0	0	0	0	0	7.10447e-05	6.96863e-05	0.00010838
53	0.000672428	10.691	10.808	0	0	0	0	0	0	0	0	0	0	0	0	0	0	0	0	0	0	0	0	0	0	0	0	0	0	0	8.58238e-05	9.64676e-05	6.62868e-05
65	0.000672428	14.302	14.316	0	0	0	0	0	0	0	0	0	0	0	0	0	0	0	0	0	0	0	0	0	0	0	0	0	0	0	8.58238e-05	7.32789e-05	8.94124e-05
128	0.000672428	37.354	37.356	0	0	0	0	0	0	0	0	0	0	0	0	0	0	0	0	0	0	0	0	0	0	0	0	0	0	0	5.24435e-05	9.35798e-05	0.000102086
70	0.000672428	10.218	10.222	0	0	0	0	0	0	0	0	0	0	0	0	0	0	0	0	0	0	0	0	0	0	0	0	0	0	0	7.44847e-05	9.13279e-05	8.12672e-05
66	0.000672428	2.411	2.421	0	0	0	0	0	0	0	0	0	0	0	0	0	0	0	0	0	0	0	0	0	0	0	0	0	0	0	8.85152e-05	8.29738e-05	7.55854e-05
75	0.000672428	28.017	28.02	0	0	0	0	0	0	0	0	0	0	0	0	0	0	0	0	0	0	0	0	0	0	0	0	0	0	0	9.03786e-05	6.7658e-05	8.87573e-05
59	0.000672428	11.234	11.263	0	0	0	0	0	0	0	0	0	0	0	0	0	0	0	0	0	0	0	0	0	0	0	0	0	0	0	6.73181e-05	6.69188e-05	0.000110331
118	0.000672428	37.354	37.356	0	0	0	0	0	0	0	0	0	0	0	0	0	0	0	0	0	0	0	0	0	0	0	0	0	0	0	5.14879e-05	8.08767e-05	0.000110231
62	0.000672428	13.453	13.477	0	0	0	0	0	0	0	0	0	0	0	0	0	0	0	0	0	0	0	0	0	0	0	0	0	0	0	6.48815e-05	8.07048e-05	9.66035e-05
93	0.000672428	14.407	14.46	0	0	0	0	0	0	0	0	0	0	0	0	0	0	0	0	0	0	0	0	0	0	0	0	0	0	0	6.348e-05	0.000104701	7.19685e-05
91	0.000672428	13.672	13.77	0	0	0	0	0	0	0	0	0	0	0	0	0	0	0	0	0	0	0	0	0	0	0	0	0	0	0	6.31933e-05	0.000119983	5.55926e-05
98	0.000672428	16.302	16.306	0	0	0	0	0	0	0	0	0	0	0	0	0	0	0	0	0	0	0	0	0	0	0	0	0	0	0	9.15889e-05	7.82295e-05	6.89069e-05
63	0.000672428	3.75	3.79	0	0	0	0	0	0	0	0	0	0	0	0	0	0	0	0	0	0	0	0	0	0	0	0	0	0	0	6.52637e-05	8.09626e-05	9.20468e-05
88	0.000672428	2.411	2.421	0	0	0	0	0	0	0	0	0	0	0	0	0	0	0	0	0	0	0	0	0	0	0	0	0	0	0	8.66679e-05	7.58917e-05	7.54288e-05
116	0.000672428	11.234	11.255	0	0	0	0	0	0	0	0	0	0	0	0	0	0	0	0	0	0	0	0	0	0	0	0	0	0	0	6.73181e-05	7.85217e-05	9.01813e-05
61	0.000672428	3.598	3.613	0	0	0	0	0	0	0	0	0	0	0	0	0	0	0	0	0	0	0	0	0	0	0	0	0	0	0	7.72398e-05	7.75419e-05	8.1082e-05
59	0.000672428	26.795	26.798	0	0	0	0	0	0	0	0	0	0	0	0	0	0	0	0	0	0	0	0	0	0	0	0	0	0	0	6.34481e-05	9.32531e-05	7.86043e-05
112	0.000672428	10.327	10.33	0	0	0	0	0	0	0	0	0	0	0	0	0	0	0	0	0	0	0	0	0	0	0	0	0	0	0	8.67634e-05	7.73872e-05	7.02312e-05
69	0.000672428	4.351	4.352	0	0	0	0	0	0	0	0	0	0	0	0	0	0	0	0	0	0	0	0	0	0	0	0	0	0	0	7.82113e-05	7.29179e-05	8.22924e-05
117	0.000672428	29.338	29.341	0	0	0	0	0	0	0	0	0	0	0	0	0	0	0	0	0	0	0	0	0	0	0	0	0	0	0	7.56154e-05	6.70563e-05	9.06655e-05
63	0.000672428	9.098	9.109	0	0	0	0	0	0	0	0	0	0	0	0	0	0	0	0	0	0	0	0	0	0	0	0	0	0	0	8.58079e-05	7.91234e-05	6.78816e-05
110	0.000672428	12.475	12.483	0	0	0	0	0	0	0	0	0	0	0	0	0	0	0	0	0	0	0	0	0	0	0	0	0	0	0	5.86545e-05	6.81393e-05	0.000105575
107	0.000672428	16.193	16.199	0	0	0	0	0	0	0	0	0	0	0	0	0	0	0	0	0	0	0	0	0	0	0	0	0	0	0	7.7845e-05	7.63215e-05	7.81059e-05
139	0.000672428	20.637	20.642	0	0	0	0	0	0	0	0	0	0	0	0	0	0	0	0	0	0	0	0	0	0	0	0	0	0	0	4.90513e-05	8.35754e-05	9.81557e-05
127	0.000672428	28.017	28.02	0	0	0	0	0	0	0	0	0	0	0	0	0	0	0	0	0	0	0	0	0	0	0	0	0	0	0	8.45657e-05	6.38075e-05	8.22497e-05
77	0.000672428	17.252	17.258	0	0	0	0	0	0	0	0	0	0	0	0	0	0	0	0	0	0	0	0	0	0	0	0	0	0	0	7.69532e-05	6.59218e-05	8.72194e-05
66	0.000672428	14.302	14.316	0	0	0	0	0	0	0	0	0	0	0	0	0	0	0	0	0	0	0	0	0	0	0	0	0	0	0	8.54416e-05	7.38806e-05	7.06727e-05
92	0.000672428	17.252	17.258	0	0	0	0	0	0	0	0	0	0	0	0	0	0	0	0	0	0	0	0	0	0	0	0	0	0	0	7.77017e-05	7.19381e-05	7.99713e-05
81	0.000672428	9.275	9.288	0	0	0	0	0	0	0	0	0	0	0	0	0	0	0	0	0	0	0	0	0	0	0	0	0	0	0	6.06611e-05	7.11302e-05	9.69738e-05
71	0.000672428	21.188	21.191	0	0	0	0	0	0	0	0	0	0	0	0	0	0	0	0	0	0	0	0	0	0	0	0	0	0	0	6.30341e-05	9.43705e-05	7.0872e-05
125	0.000672428	31.153	31.162	0	0	0	0	0	0	0	0	0	0	0	0	0	0	0	0	0	0	0	0	0	0	0	0	0	0	0	7.14429e-05	7.57026e-05	8.09966e-05
59	0.000672428	7.099	7.177	0	0	0	0	0	0	0	0	0	0	0	0	0	0	0	0	0	0	0	0	0	0	0	0	0	0	0	8.61264e-05	9.66739e-05	4.50835e-05
70	0.000672428	9.588	9.66	0	0	0	0	0	0	0	0	0	0	0	0	0	0	0	0	0	0	0	0	0	0	0	0	0	0	0	8.28298e-05	7.17834e-05	7.24669e-05
106	0.000672428	23.278	23.281	0	0	0	0	0	0	0	0	0	0	0	0	0	0	0	0	0	0	0	0	0	0	0	0	0	0	0	5.35901e-05	7.62871e-05	9.68883e-05
126	0.000672428	12.862	12.868	0	0	0	0	0	0	0	0	0	0	0	0	0	0	0	0	0	0	0	0	0	0	0	0	0	0	0	7.9995e-05	9.96133e-05	4.59949e-05
79	0.000672428	30.901	30.905	0	0	0	0	0	0	0	0	0	0	0	0	0	0	0	0	0	0	0	0	0	0	0	0	0	0	0	5.24275e-05	9.67598e-05	7.58417e-05
70	0.000672428	18.306	18.312	0	0	0	0	0	0	0	0	0	0	0	0	0	0	0	0	0	0	0	0	0	0	0	0	0	0	0	7.19525e-05	7.13881e-05	8.14095e-05
70	0.000672428	8.415	8.421	0	0	0	0	0	0	0	0	0	0	0	0	0	0	0	0	0	0	0	0	0	0	0	0	0	0	0	7.41502e-05	6.44607e-05	8.54679e-05
84	0.000672428	6.393	6.399	0	0	0	0	0	0	0	0	0	0	0	0	0	0	0	0	0	0	0	0	0	0	0	0	0	0	0	5.58038e-05	6.58702e-05	0.000102371
55	0.000672428	31.153	31.162	0	0	0	0	0	0	0	0	0	0	0	0	0	0	0	0	0	0	0	0	0	0	0	0	0	0	0	5.85908e-05	7.95015e-05	8.571e-05
132	0.000672428	22.53	22.536	0	0	0	0	0	0	0	0	0	0	0	0	0	0	0	0	0	0	0	0	0	0	0	0	0	0	0	7.04714e-05	6.3395e-05	8.84441e-05
71	0.000672428	14.912	14.921	0	0	0	0	0	0	0	0	0	0	0	0	0	0	0	0	0	0	0	0	0	0	0	0	0	0	0	8.23042e-05	7.66825e-05	6.32252e-05
84	0.000672428	15.286	15.348	0	0	0	0	0	0	0	0	0	0	0	0	0	0	0	0	0	0	0	0	0	0	0	0	0	0	0	4.96724e-05	9.88226e-05	7.35491e-05
119	0.000672428	26.993	26.997	0	0	0	0	0	0	0	0	0	0	0	0	0	0	0	0	0	0	0	0	0	0	0	0	0	0	0	5.83519e-05	6.4031e-05	9.91667e-05
84	0.000672428	15.103	15.121	0	0	0	0	0	0	0	0	0	0	0	0	0	0	0	0	0	0	0	0	0	0	0	0	0	0	0	6.30181e-05	8.20972e-05	7.6155e-05
83	0.000672428	9.588	9.594	0	0	0	0	0	0	0	0	0	0	0	0	0	0	0	0	0	0	0	0	0	0	0	0	0	0	0	8.19857e-05	6.21229e-05	7.69952e-05
56	0.000672428	7.908	7.938	0	0	0	0	0	0	0	0	0	0	0	0	0	0	0	0	0	0	0	0	0	0	0	0	0	0	0	7.96605e-05	7.69231e-05	6.41793e-05
69	0.000672428	21.188	21.191	0	0	0	0	0	0	0	0	0	0	0	0	0	0	0	0	0	0	0	0	0	0	0	0	0	0	0	6.01037e-05	9.0245e-05	7.02455e-05
57	0.000672428	10.691	10.808	0	0	0	0	0	0	0	0	0	0	0	0	0	0	0	0	0	0	0	0	0	0	0	0	0	0	0	7.10129e-05	8.86292e-05	6.09041e-05
59	0.000672428	20.063	20.077	0	0	0	0	0	0	0	0	0	0	0	0	0	0	0	0	0	0	0	0	0	0	0	0	0	0	0	0.000104775	7.64074e-05	3.90743e-05
76	0.000672428	9.098	9.109	0	0	0	0	0	0	0	0	0	0	0	0	0	0	0	0	0	0	0	0	0	0	0	0	0	0	0	8.43746e-05	7.19038e-05	6.32821e-05
126	0.000672428	14.245	14.264	0	0	0	0	0	0	0	0	0	0	0	0	0	0	0	0	0	0	0	0	0	0	0	0	0	0	0	5.72052e-05	7.12162e-05	9.04092e-05
57	0.000672428	12.39	12.402	0	0	0	0	0	0	0	0	0	0	0	0	0	0	0	0	0	0	0	0	0	0	0	0	0	0	0	7.54084e-05	6.77267e-05	7.4489e-05
81	0.000672428	12.475	12.497	0	0	0	0	0	0	0	0	0	0	0	0	0	0	0	0	0	0	0	0	0	0	0	0	0	0	0	6.31615e-05	7.77826e-05	7.58845e-05
126	0.000672428	14.399	14.413	0	0	0	0	0	0	0	0	0	0	0	0	0	0	0	0	0	0	0	0	0	0	0	0	0	0	0	6.72544e-05	6.7933e-05	8.08542e-05
121	0.000672428	29.992	29.996	0	0	0	0	0	0	0	0	0	0	0	0	0	0	0	0	0	0	0	0	0	0	0	0	0	0	0	7.16817e-05	7.7731e-05	6.64149e-05
112	0.000672428	22.377	22.381	0	0	0	0	0	0	0	0	0	0	0	0	0	0	0	0	0	0	0	0	0	0	0	0	0	0	0	7.8052e-05	6.65922e-05	7.11711e-05
99	0.000672428	7.114	7.123	0	0	0	0	0	0	0	0	0	0	0	0	0	0	0	0	0	0	0	0	0	0	0	0	0	0	0	9.95518e-05	5.28234e-05	6.25559e-05
58	0.000672428	19.506	19.512	0	0	0	0	0	0	0	0	0	0	0	0	0	0	0	0	0	0	0	0	0	0	0	0	0	0	0	8.37057e-05	7.04427e-05	6.06335e-05
83	0.000672428	13.293	13.295	0	0	0	0	0	0	0	0	0	0	0	0	0	0	0	0	0	0	0	0	0	0	0	0	0	0	0	7.60772e-05	5.86163e-05	7.96153e-05
77	0.000672428	12.862	12.868	0	0	0	0	0	0	0	0	0	0	0	0	0	0	0	0	0	0	0	0	0	0	0	0	0	0	0	8.00587e-05	8.67383e-05	4.73904e-05
79	0.000672428	20.153	20.156	0	0	0	0	0	0	0	0	0	0	0	0	0	0	0	0	0	0	0	0	0	0	0	0	0	0	0	4.95927e-05	7.30039e-05	9.07794e-05
100	0.000672428	4.65	4.661	0	0	0	0	0	0	0	0	0	0	0	0	0	0	0	0	0	0	0	0	0	0	0	0	0	0	0	5.94349e-05	0.000103395	4.99678e-05
73	0.000672428	15.655	15.711	0	0	0	0	0	0	0	0	0	0	0	0	0	0	0	0	0	0	0	0	0	0	0	0	0	0	0	7.42936e-05	7.98797e-05	5.69596e-05
52	0.000672428	20.063	20.077	0	0	0	0	0	0	0	0	0	0	0	0	0	0	0	0	0	0	0	0	0	0	0	0	0	0	0	9.01078e-05	7.81951e-05	4.24064e-05
55	0.000672428	21.685	21.704	0	0	0	0	0	0	0	0	0	0	0	0	0	0	0	0	0	0	0	0	0	0	0	0	0	0	0	7.81635e-05	7.18866e-05	6.00924e-05
68	0.000672428	3.582	3.613	0	0	0	0	0	0	0	0	0	0	0	0	0	0	0	0	0	0	0	0	0	0	0	0	0	0	0	5.68071e-05	5.38548e-05	9.94658e-05
125	0.000672428	18.306	18.312	0	0	0	0	0	0	0	0	0	0	0	0	0	0	0	0	0	0	0	0	0	0	0	0	0	0	0	6.22856e-05	6.98238e-05	7.73369e-05
68	0.000672428	5.346	5.35	0	0	0	0	0	0	0	0	0	0	0	0	0	0	0	0	0	0	0	0	0	0	0	0	0	0	0	7.53924e-05	7.21444e-05	6.09326e-05
56	0.000672428	7.728	7.732	0	0	0	0	0	0	0	0	0	0	0	0	0	0	0	0	0	0	0	0	0	0	0	0	0	0	0	6.67766e-05	7.84186e-05	6.31967e-05
93	0.000672428	15.103	15.121	0	0	0	0	0	0	0	0	0	0	0	0	0	0	0	0	0	0	0	0	0	0	0	0	0	0	0	6.43081e-05	7.00817e-05	7.32928e-05
60	0.000672428	18.907	18.985	0	0	0	0	0	0	0	0	0	0	0	0	0	0	0	0	0	0	0	0	0	0	0	0	0	0	0	5.22205e-05	4.58616e-05	0.00010875
84	0.000672428	8.415	8.421	0	0	0	0	0	0	0	0	0	0	0	0	0	0	0	0	0	0	0	0	0	0	0	0	0	0	0	7.10606e-05	5.73099e-05	7.77072e-05
123	0.000672428	18.233	18.281	0	0	0	0	0	0	0	0	0	0	0	0	0	0	0	0	0	0	0	0	0	0	0	0	0	0	0	3.31415e-05	9.61926e-05	7.6511e-05
97	0.000672428	10.194	10.219	0	0	0	0	0	0	0	0	0	0	0	0	0	0	0	0	0	0	0	0	0	0	0	0	0	0	0	7.37202e-05	6.9291e-05	6.26841e-05
61	0.000672428	12.862	12.868	0	0	0	0	0	0	0	0	0	0	0	0	0	0	0	0	0	0	0	0	0	0	0	0	0	0	0	5.43386e-05	9.51612e-05	5.61764e-05
71	0.000672428	8.274	8.286	0	0	0	0	0	0	0	0	0	0	0	0	0	0	0	0	0	0	0	0	0	0	0	0	0	0	0	7.5058e-05	5.75161e-05	7.29795e-05
54	0.000672428	16.193	16.199	0	0	0	0	0	0	0	0	0	0	0	0	0	0	0	0	0	0	0	0	0	0	0	0	0	0	0	7.06306e-05	6.71938e-05	6.7725e-05
52	0.000672428	21.685	21.704	0	0	0	0	0	0	0	0	0	0	0	0	0	0	0	0	0	0	0	0	0	0	0	0	0	0	0	7.33699e-05	7.28836e-05	5.92807e-05
95	0.000672428	14.912	14.921	0	0	0	0	0	0	0	0	0	0	0	0	0	0	0	0	0	0	0	0	0	0	0	0	0	0	0	7.45325e-05	7.03395e-05	5.98503e-05
58	0.000672428	14.57	14.574	0	0	0	0	0	0	0	0	0	0	0	0	0	0	0	0	0	0	0	0	0	0	0	0	0	0	0	8.82127e-05	5.26515e-05	6.28407e-05
87	0.000672428	13.692	13.77	0	0	0	0	0	0	0	0	0	0	0	0	0	0	0	0	0	0	0	0	0	0	0	0	0	0	0	9.16367e-05	5.82725e-05	5.35278e-05
111	0.000672428	16.779	16.784	0	0	0	0	0	0	0	0	0	0	0	0	0	0	0	0	0	0	0	0	0	0	0	0	0	0	0	6.59644e-05	8.03266e-05	5.68172e-05
68	0.000672428	18.457	18.46	0	0	0	0	0	0	0	0	0	0	0	0	0	0	0	0	0	0	0	0	0	0	0	0	0	0	0	6.79392e-05	6.78814e-05	6.56602e-05
129	0.000672428	28.017	28.02	0	0	0	0	0	0	0	0	0	0	0	0	0	0	0	0	0	0	0	0	0	0	0	0	0	0	0	6.68403e-05	6.20542e-05	7.12992e-05
76	0.000672428	13.692	13.77	0	0	0	0	0	0	0	0	0	0	0	0	0	0	0	0	0	0	0	0	0	0	0	0	0	0	0	7.48669e-05	6.52514e-05	5.96367e-05
126	0.000672428	15.103	15.121	0	0	0	0	0	0	0	0	0	0	0	0	0	0	0	0	0	0	0	0	0	0	0	0	0	0	0	5.29053e-05	7.69919e-05	6.89354e-05
105	0.000672428	17.188	17.258	0	0	0	0	0	0	0	0	0	0	0	0	0	0	0	0	0	0	0	0	0	0	0	0	0	0	0	6.54389e-05	6.18823e-05	7.12707e-05
53	0.000672428	16.937	16.941	0	0	0	0	0	0	0	0	0	0	0	0	0	0	0	0	0	0	0	0	0	0	0	0	0	0	0	7.54402e-05	6.10056e-05	6.19721e-05
71	0.000672428	29.102	29.107	0	0	0	0	0	0	0	0	0	0	0	0	0	0	0	0	0	0	0	0	0	0	0	0	0	0	0	6.44992e-05	6.29996e-05	6.95762e-05
74	0.000672428	9.098	9.109	0	0	0	0	0	0	0	0	0	0	0	0	0	0	0	0	0	0	0	0	0	0	0	0	0	0	0	7.34336e-05	6.39966e-05	5.8583e-05
79	0.000672428	18.233	18.281	0	0	0	0	0	0	0	0	0	0	0	0	0	0	0	0	0	0	0	0	0	0	0	0	0	0	0	3.89066e-05	7.6098e-05	8.04128e-05
66	0.000672428	3.747	3.754	0	0	0	0	0	0	0	0	0	0	0	0	0	0	0	0	0	0	0	0	0	0	0	0	0	0	0	7.08218e-05	5.66223e-05	6.76396e-05
91	0.000672428	14.302	14.316	0	0	0	0	0	0	0	0	0	0	0	0	0	0	0	0	0	0	0	0	0	0	0	0	0	0	0	6.40374e-05	6.17276e-05	6.79528e-05
104	0.000672428	22.53	22.536	0	0	0	0	0	0	0	0	0	0	0	0	0	0	0	0	0	0	0	0	0	0	0	0	0	0	0	6.20467e-05	5.67082e-05	7.42896e-05
69	0.000672428	10.691	10.808	0	0	0	0	0	0	0	0	0	0	0	0	0	0	0	0	0	0	0	0	0	0	0	0	0	0	0	4.65987e-05	8.85088e-05	5.73726e-05
59	0.000672428	5.346	5.35	0	0	0	0	0	0	0	0	0	0	0	0	0	0	0	0	0	0	0	0	0	0	0	0	0	0	0	6.59007e-05	6.3395e-05	6.29546e-05
60	0.000672428	9.767	9.786	0	0	0	0	0	0	0	0	0	0	0	0	0	0	0	0	0	0	0	0	0	0	0	0	0	0	0	3.97029e-05	6.5217e-05	8.6479e-05
72	0.000672428	14.912	14.921	0	0	0	0	0	0	0	0	0	0	0	0	0	0	0	0	0	0	0	0	0	0	0	0	0	0	0	7.04714e-05	6.64547e-05	5.40547e-05
50	0.000672428	21.658	21.704	0	0	0	0	0	0	0	0	0	0	0	0	0	0	0	0	0	0	0	0	0	0	0	0	0	0	0	3.54348e-05	3.33649e-05	0.000122079
73	0.000672428	2.411	2.421	0	0	0	0	0	0	0	0	0	0	0	0	0	0	0	0	0	0	0	0	0	0	0	0	0	0	0	6.8624e-05	6.63687e-05	5.48094e-05
55	0.000672428	7.908	7.922	0	0	0	0	0	0	0	0	0	0	0	0	0	0	0	0	0	0	0	0	0	0	0	0	0	0	0	5.92119e-05	7.16975e-05	5.84833e-05
84	0.000672428	13.648	13.662	0	0	0	0	0	0	0	0	0	0	0	0	0	0	0	0	0	0	0	0	0	0	0	0	0	0	0	6.42604e-05	5.45595e-05	6.93768e-05
56	0.000672428	19.585	19.589	0	0	0	0	0	0	0	0	0	0	0	0	0	0	0	0	0	0	0	0	0	0	0	0	0	0	0	7.65869e-05	6.45123e-05	4.66642e-05
73	0.000672428	5.058	5.072	0	0	0	0	0	0	0	0	0	0	0	0	0	0	0	0	0	0	0	0	0	0	0	0	0	0	0	8.54734e-05	5.73786e-05	4.46848e-05
83	0.000672428	8.274	8.286	0	0	0	0	0	0	0	0	0	0	0	0	0	0	0	0	0	0	0	0	0	0	0	0	0	0	0	6.58689e-05	5.51956e-05	6.62298e-05
140	0.000672428	17.004	17.013	0	0	0	0	0	0	0	0	0	0	0	0	0	0	0	0	0	0	0	0	0	0	0	0	0	0	0	4.77772e-05	5.52987e-05	8.37164e-05
80	0.000672428	14.307	14.322	0	0	0	0	0	0	0	0	0	0	0	0	0	0	0	0	0	0	0	0	0	0	0	0	0	0	0	8.30049e-05	3.78857e-05	6.57314e-05
55	0.000672428	16.937	16.941	0	0	0	0	0	0	0	0	0	0	0	0	0	0	0	0	0	0	0	0	0	0	0	0	0	0	0	6.69359e-05	5.4147e-05	6.4165e-05
61	0.000672428	16.939	16.972	0	0	0	0	0	0	0	0	0	0	0	0	0	0	0	0	0	0	0	0	0	0	0	0	0	0	0	3.63744e-05	5.55565e-05	9.28015e-05
69	0.000672428	15.103	15.121	0	0	0	0	0	0	0	0	0	0	0	0	0	0	0	0	0	0	0	0	0	0	0	0	0	0	0	5.41634e-05	6.93941e-05	6.08898e-05
106	0.000672428	17.967	17.972	0	0	0	0	0	0	0	0	0	0	0	0	0	0	0	0	0	0	0	0	0	0	0	0	0	0	0	5.46412e-05	5.65535e-05	7.28798e-05
61	0.000672428	2.411	2.421	0	0	0	0	0	0	0	0	0	0	0	0	0	0	0	0	0	0	0	0	0	0	0	0	0	0	0	8.04568e-05	6.03868e-05	4.29333e-05
81	0.000672428	30.028	30.035	0	0	0	0	0	0	0	0	0	0	0	0	0	0	0	0	0	0	0	0	0	0	0	0	0	0	0	6.563e-05	7.02879e-05	4.7305e-05
121	0.000672428	17.252	17.258	0	0	0	0	0	0	0	0	0	0	0	0	0	0	0	0	0	0	0	0	0	0	0	0	0	0	0	6.57414e-05	5.5419e-05	6.16161e-05
55	0.000672428	9.254	9.261	0	0	0	0	0	0	0	0	0	0	0	0	0	0	0	0	0	0	0	0	0	0	0	0	0	0	0	6.43559e-05	4.13408e-05	7.69097e-05
113	0.000672428	11.318	11.435	0	0	0	0	0	0	0	0	0	0	0	0	0	0	0	0	0	0	0	0	0	0	0	0	0	0	0	4.72835e-05	8.46756e-05	5.06371e-05
58	0.000672428	16.302	16.306	0	0	0	0	0	0	0	0	0	0	0	0	0	0	0	0	0	0	0	0	0	0	0	0	0	0	0	5.40042e-05	6.32059e-05	6.53185e-05
70	0.000672428	19.585	19.589	0	0	0	0	0	0	0	0	0	0	0	0	0	0	0	0	0	0	0	0	0	0	0	0	0	0	0	7.49624e-05	6.47701e-05	4.27482e-05
90	0.000672428	15.65	15.655	0	0	0	0	0	0	0	0	0	0	0	0	0	0	0	0	0	0	0	0	0	0	0	0	0	0	0	6.03426e-05	6.17619e-05	5.96083e-05
69	0.000672428	10.218	10.222	0	0	0	0	0	0	0	0	0	0	0	0	0	0	0	0	0	0	0	0	0	0	0	0	0	0	0	6.63307e-05	6.11775e-05	5.32288e-05
83	0.000672428	14.407	14.418	0	0	0	0	0	0	0	0	0	0	0	0	0	0	0	0	0	0	0	0	0	0	0	0	0	0	0	5.56605e-05	5.80318e-05	6.55748e-05
120	0.000672428	14.224	14.245	0	0	0	0	0	0	0	0	0	0	0	0	0	0	0	0	0	0	0	0	0	0	0	0	0	0	0	6.2413e-05	5.99399e-05	5.60768e-05
84	0.000672428	11.489	11.5	0	0	0	0	0	0	0	0	0	0	0	0	0	0	0	0	0	0	0	0	0	0	0	0	0	0	0	6.16326e-05	5.66738e-05	5.94943e-05
67	0.000672428	17.939	17.946	0	0	0	0	0	0	0	0	0	0	0	0	0	0	0	0	0	0	0	0	0	0	0	0	0	0	0	5.18224e-05	6.02321e-05	6.34815e-05
67	0.000672428	12.475	12.483	0	0	0	0	0	0	0	0	0	0	0	0	0	0	0	0	0	0	0	0	0	0	0	0	0	0	0	5.88456e-05	6.00258e-05	5.66321e-05
104	0.000672428	15.655	15.711	0	0	0	0	0	0	0	0	0	0	0	0	0	0	0	0	0	0	0	0	0	0	0	0	0	0	0	6.28589e-05	7.17147e-05	4.03417e-05
66	0.000672428	16.854	16.864	0	0	0	0	0	0	0	0	0	0	0	0	0	0	0	0	0	0	0	0	0	0	0	0	0	0	0	5.27142e-05	6.53889e-05	5.66891e-05
70	0.000672428	3.991	3.992	0	0	0	0	0	0	0	0	0	0	0	0	0	0	0	0	0	0	0	0	0	0	0	0	0	0	0	6.89903e-05	4.82854e-05	5.69881e-05
145	0.000672428	14.726	14.744	0	0	0	0	0	0	0	0	0	0	0	0	0	0	0	0	0	0	0	0	0	0	0	0	0	0	0	7.52332e-05	4.89901e-05	4.97685e-05
146	0.000672428	29.338	29.341	0	0	0	0	0	0	0	0	0	0	0	0	0	0	0	0	0	0	0	0	0	0	0	0	0	0	0	5.30646e-05	5.65707e-05	6.30543e-05
53	0.000672428	2.973	2.984	0	0	0	0	0	0	0	0	0	0	0	0	0	0	0	0	0	0	0	0	0	0	0	0	0	0	0	6.3703e-05	5.68457e-05	5.13918e-05
123	0.000672428	14.307	14.322	0	0	0	0	0	0	0	0	0	0	0	0	0	0	0	0	0	0	0	0	0	0	0	0	0	0	0	5.27301e-05	5.21874e-05	6.6244e-05
50	0.000672428	9.074	9.121	0	0	0	0	0	0	0	0	0	0	0	0	0	0	0	0	0	0	0	0	0	0	0	0	0	0	0	8.08868e-05	4.27847e-05	4.70344e-05
98	0.000672428	10.327	10.33	0	0	0	0	0	0	0	0	0	0	0	0	0	0	0	0	0	0	0	0	0	0	0	0	0	0	0	6.36233e-05	5.75333e-05	4.8316e-05
97	0.000672428	12.475	12.483	0	0	0	0	0	0	0	0	0	0	0	0	0	0	0	0	0	0	0	0	0	0	0	0	0	0	0	5.75715e-05	5.91835e-05	5.21181e-05
67	0.000672428	8.265	8.277	0	0	0	0	0	0	0	0	0	0	0	0	0	0	0	0	0	0	0	0	0	0	0	0	0	0	0	5.99604e-05	5.57112e-05	5.28585e-05
134	0.000672428	15.88	15.887	0	0	0	0	0	0	0	0	0	0	0	0	0	0	0	0	0	0	0	0	0	0	0	0	0	0	0	5.94189e-05	4.64633e-05	6.12601e-05
101	0.000672428	21.678	21.689	0	0	0	0	0	0	0	0	0	0	0	0	0	0	0	0	0	0	0	0	0	0	0	0	0	0	0	8.24953e-05	5.25312e-05	3.10145e-05
53	0.000672428	4.862	4.868	0	0	0	0	0	0	0	0	0	0	0	0	0	0	0	0	0	0	0	0	0	0	0	0	0	0	0	5.32716e-05	5.92523e-05	5.32145e-05
51	0.000672428	4.642	4.661	0	0	0	0	0	0	0	0	0	0	0	0	0	0	0	0	0	0	0	0	0	0	0	0	0	0	0	4.35728e-05	7.01676e-05	5.15342e-05
105	0.000672428	15.65	15.655	0	0	0	0	0	0	0	0	0	0	0	0	0	0	0	0	0	0	0	0	0	0	0	0	0	0	0	5.75556e-05	5.68457e-05	5.06798e-05
82	0.000672428	9.746	9.795	0	0	0	0	0	0	0	0	0	0	0	0	0	0	0	0	0	0	0	0	0	0	0	0	0	0	0	5.32079e-05	6.72454e-05	4.42719e-05
80	0.000672428	12.862	12.868	0	0	0	0	0	0	0	0	0	0	0	0	0	0	0	0	0	0	0	0	0	0	0	0	0	0	0	5.09146e-05	6.64375e-05	4.71199e-05
55	0.000672428	15.472	15.48	0	0	0	0	0	0	0	0	0	0	0	0	0	0	0	0	0	0	0	0	0	0	0	0	0	0	0	5.7253e-05	5.25484e-05	5.40974e-05
108	0.000672428	15.65	15.655	0	0	0	0	0	0	0	0	0	0	0	0	0	0	0	0	0	0	0	0	0	0	0	0	0	0	0	5.76671e-05	5.51096e-05	5.10358e-05
54	0.000672428	11.166	11.178	0	0	0	0	0	0	0	0	0	0	0	0	0	0	0	0	0	0	0	0	0	0	0	0	0	0	0	5.49119e-05	5.45252e-05	5.41828e-05
71	0.000672428	11.245	11.257	0	0	0	0	0	0	0	0	0	0	0	0	0	0	0	0	0	0	0	0	0	0	0	0	0	0	0	7.18888e-05	6.16244e-05	2.94339e-05
83	0.000672428	12.379	12.39	0	0	0	0	0	0	0	0	0	0	0	0	0	0	0	0	0	0	0	0	0	0	0	0	0	0	0	5.09305e-05	5.79631e-05	5.27873e-05
53	0.000672428	13.648	13.662	0	0	0	0	0	0	0	0	0	0	0	0	0	0	0	0	0	0	0	0	0	0	0	0	0	0	0	3.15807e-05	6.21057e-05	6.79386e-05
62	0.000672428	21.188	21.191	0	0	0	0	0	0	0	0	0	0	0	0	0	0	0	0	0	0	0	0	0	0	0	0	0	0	0	4.4401e-05	6.37903e-05	5.33142e-05
80	0.000672428	15.65	15.655	0	0	0	0	0	0	0	0	0	0	0	0	0	0	0	0	0	0	0	0	0	0	0	0	0	0	0	5.68867e-05	5.07607e-05	5.35705e-05
75	0.000672428	9.098	9.109	0	0	0	0	0	0	0	0	0	0	0	0	0	0	0	0	0	0	0	0	0	0	0	0	0	0	0	6.13778e-05	5.92695e-05	4.05553e-05
82	0.000672428	3.747	3.754	0	0	0	0	0	0	0	0	0	0	0	0	0	0	0	0	0	0	0	0	0	0	0	0	0	0	0	4.47035e-05	5.73786e-05	5.87681e-05
110	0.000672428	14.92	14.931	0	0	0	0	0	0	0	0	0	0	0	0	0	0	0	0	0	0	0	0	0	0	0	0	0	0	0	5.65841e-05	5.94757e-05	4.4457e-05
62	0.000672428	2.411	2.421	0	0	0	0	0	0	0	0	0	0	0	0	0	0	0	0	0	0	0	0	0	0	0	0	0	0	0	4.51972e-05	5.43017e-05	6.07332e-05
115	0.000672428	29.338	29.341	0	0	0	0	0	0	0	0	0	0	0	0	0	0	0	0	0	0	0	0	0	0	0	0	0	0	0	3.81103e-05	5.84272e-05	6.34245e-05
63	0.000672428	2.411	2.421	0	0	0	0	0	0	0	0	0	0	0	0	0	0	0	0	0	0	0	0	0	0	0	0	0	0	0	6.57414e-05	4.07048e-05	5.15627e-05
151	0.000672428	26.095	26.102	0	0	0	0	0	0	0	0	0	0	0	0	0	0	0	0	0	0	0	0	0	0	0	0	0	0	0	7.69691e-05	3.2746e-05	4.68635e-05
65	0.000672428	3.598	3.613	0	0	0	0	0	0	0	0	0	0	0	0	0	0	0	0	0	0	0	0	0	0	0	0	0	0	0	5.57719e-05	4.63601e-05	5.40262e-05
66	0.000672428	17.698	17.699	0	0	0	0	0	0	0	0	0	0	0	0	0	0	0	0	0	0	0	0	0	0	0	0	0	0	0	3.29026e-05	5.7774e-05	6.47773e-05
79	0.000672428	9.098	9.109	0	0	0	0	0	0	0	0	0	0	0	0	0	0	0	0	0	0	0	0	0	0	0	0	0	0	0	5.17427e-05	5.2428e-05	5.0452e-05
72	0.000672428	11.234	11.255	0	0	0	0	0	0	0	0	0	0	0	0	0	0	0	0	0	0	0	0	0	0	0	0	0	0	0	4.79524e-05	6.12806e-05	4.50835e-05
54	0.000672428	21.685	21.704	0	0	0	0	0	0	0	0	0	0	0	0	0	0	0	0	0	0	0	0	0	0	0	0	0	0	0	5.30646e-05	5.26687e-05	4.74331e-05
86	0.000672428	21.678	21.689	0	0	0	0	0	0	0	0	0	0	0	0	0	0	0	0	0	0	0	0	0	0	0	0	0	0	0	5.09624e-05	4.63258e-05	5.40832e-05
106	0.000672428	9.178	9.189	0	0	0	0	0	0	0	0	0	0	0	0	0	0	0	0	0	0	0	0	0	0	0	0	0	0	0	4.72517e-05	5.40267e-05	4.7903e-05
54	0.000672428	14.912	14.921	0	0	0	0	0	0	0	0	0	0	0	0	0	0	0	0	0	0	0	0	0	0	0	0	0	0	0	5.33034e-05	5.34078e-05	4.21786e-05
124	0.000672428	20.732	20.742	0	0	0	0	0	0	0	0	0	0	0	0	0	0	0	0	0	0	0	0	0	0	0	0	0	0	0	4.69491e-05	4.11689e-05	5.83267e-05
70	0.000672428	22.784	22.79	0	0	0	0	0	0	0	0	0	0	0	0	0	0	0	0	0	0	0	0	0	0	0	0	0	0	0	4.24739e-05	5.5058e-05	4.69205e-05
62	0.000672428	15.65	15.655	0	0	0	0	0	0	0	0	0	0	0	0	0	0	0	0	0	0	0	0	0	0	0	0	0	0	0	5.21249e-05	3.46541e-05	5.59913e-05
109	0.000672428	20.071	20.096	0	0	0	0	0	0	0	0	0	0	0	0	0	0	0	0	0	0	0	0	0	0	0	0	0	0	0	4.97998e-05	5.25999e-05	3.98005e-05
71	0.000672428	9.905	9.921	0	0	0	0	0	0	0	0	0	0	0	0	0	0	0	0	0	0	0	0	0	0	0	0	0	0	0	3.13896e-05	6.35497e-05	4.22783e-05
57	0.000672428	4.632	4.661	0	0	0	0	0	0	0	0	0	0	0	0	0	0	0	0	0	0	0	0	0	0	0	0	0	0	0	4.04673e-05	4.73056e-05	4.47987e-05
126	0.000672428	20.732	20.742	0	0	0	0	0	0	0	0	0	0	0	0	0	0	0	0	0	0	0	0	0	0	0	0	0	0	0	4.59139e-05	3.14912e-05	5.21181e-05
56	0.000675182	2.323	2.999	0	0	0	0.00646044	0.00655398	0.00633879	0	0	0	0	0	0	0	0	0	0	0	0	0	0	0	0	0	0	0	0	0	0.00353707	0.00324301	0.00307239
104	0.000675182	9.905	9.982	0	0	0	0.00212619	0.00147239	0.00148697	0	0	0	0	0	0	0	0	0	0	0	0	0	0	0	0	0	0	0	0	0	0.00845669	0.0096892	0.00584542
70	0.000675182	2.375	2.451	0	0	0	0.000631752	0.000632602	0.000643278	0	0	0	0	0	0	0	0	0	0	0	0	0	0	0	0	0	0	0	0	0	0.00620615	0.00749637	0.00366436
76	0.000675182	9.905	9.946	0	0	0	0.000691946	0.000479464	0.000498653	0	0	0	0	0	0	0	0	0	0	0	0	0	0	0	0	0	0	0	0	0	0.00392104	0.00437631	0.00254419
84	0.000675182	14.912	14.938	0	0	0	0	0	0	0	0	0	0	0	0	0	0	0	0	0	0	0	0	0	0	0	0	0.00312097	0.00146571	0.00317782	0.000406043	0.000390855	0.000315172
72	0.000675182	2.375	2.504	0	0	0	0.00160883	0.00159356	0.00162657	0	0	0	0	0	0	0	0	0	0	0	0	0	0	0	0	0	0	0	0	0	0.00106123	0.00112634	0.000874658
87	0.000675182	2.375	2.421	0	0	0	0.000956685	0.000899939	0.000929488	0	0	0	0	0	0	0	0	0	0	0	0	0	0	0	0	0	0	0	0	0	0.0014774	0.00136246	0.00126305
83	0.000675182	13.738	13.774	0	0	0	0	0	0	0.00178084	0.0012205	0.00108695	0	0	0	0	0	0	0	0	0	0	0	0	0	0	0	0	0	0	0.000229108	0.000253184	0.000187625
110	0.000675182	13.738	13.774	0	0	0	0	0	0	0.00178299	0.00113479	0.00100009	0	0	0	0	0	0	0	0	0	0	0	0	0	0	0	0	0	0	0.0001157	0.00012679	9.43536e-05
87	0.000675182	12.029	12.054	0	0	0	0	0	0	0	0	0	0	0	0	0.000408532	0.000413183	0.00045574	0	0	0	0	0	0	0	0	0	0	0	0	0.000489366	0.000737723	0.00139691
86	0.000675182	13.738	13.774	0	0	0	0	0	0	0.00138738	0.000935057	0.000889115	0	0	0	0	0	0	0	0	0	0	0	0	0	0	0	0	0	0	0.000195584	0.000216227	0.000164172
84	0.000675182	13.738	13.774	0	0	0	0	0	0	0.00125805	0.00084664	0.000791212	0	0	0	0	0	0	0	0	0	0	0	0	0	0	0	0	0	0	0.00017238	0.000180559	0.000138939
70	0.000675182	4.35	4.357	0	0	0	0.000493819	0.000394323	0.000414575	0	0	0	0	0	0	0	0	0	0	0	0	0	0	0	0	0	0	0	0	0	0.000599524	0.000532325	0.000643373
54	0.000675182	2.375	2.504	0	0	0	0.000632893	0.000573323	0.000581806	0	0	0	0	0	0	0	0	0	0	0	0	0	0	0	0	0	0	0	0	0	0.000459872	0.000417155	0.000370223
52	0.000675182	2.375	2.504	0	0	0	0.0005717	0.000576664	0.000606395	0	0	0	0	0	0	0	0	0	0	0	0	0	0	0	0	0	0	0	0	0	0.000439136	0.000472024	0.000343224
69	0.000675182	16.193	16.31	0	0	0	0	0	0	0.000867914	0.000717831	0.000703623	0	0	0	0	0	0	0	0	0	0	0	0	0	0	0	0	0	0	0.000252741	0.000194534	0.000230843
79	0.000675182	13.738	13.774	0	0	0	0	0	0	0.001113	0.000749318	0.00062838	0	0	0	0	0	0	0	0	0	0	0	0	0	0	0	0	0	0	0.000101781	9.81694e-05	8.30044e-05
121	0.000675182	16.854	16.864	0	0	0	0.000836012	0.000738375	0.000591457	0	0	0	0	0	0	0	0	0	0	0	0	0	0	0	0	0	0	0	0	0	0.000128298	0.000146008	0.000136774
79	0.000675182	12.498	12.523	0	0	0	0	0	0	0	0	0	0	0	0	0.000660146	0.000601243	0.000702576	0	0	0	0	0	0	0	0	0	0	0	0	0.000104648	0.000154517	0.000149904
90	0.000675182	16.854	16.883	0	0	0	0.000817754	0.000372529	0.000607056	0	0	0	0	0	0	0	0	0	0	0	0	0	0	0	0	0	0	0	0	0	0.00010898	0.000176536	9.49232e-05
66	0.000675182	13.738	13.774	0	0	0	0	0	0	0.000836713	0.000400898	0.000497649	0	0	0	0	0	0	0	0	0	0	0	0	0	0	0	0	0	0	0.000110079	0.000116597	8.70486e-05
65	0.000675182	13.738	13.774	0	0	0	0	0	0	0.000744539	0.000557376	0.000485593	0	0	0	0	0	0	0	0	0	0	0	0	0	0	0	0	0	0	7.49147e-05	8.43662e-05	5.70593e-05
73	0.000675182	3.545	3.613	0	0	0	0	0	0	0	0	0	0	0	0	0.000451894	0.000402303	0.000426763	0	0	0	0	0	0	0	0	0	0	0	0	0.00021616	0.000211156	0.000226827
93	0.000675182	16.854	16.864	0	0	0	0.000601084	0.000531769	0.000444319	0	0	0	0	0	0	0	0	0	0	0	0	0	0	0	0	0	0	0	0	0	8.90408e-05	9.95273e-05	9.13348e-05
62	0.000675182	16.854	16.901	0	0	0	0.000271158	0.000370931	0.000596877	0	0	0	0	0	0	0	0	0	0	0	0	0	0	0	0	0	0	0	0	0	0.000116417	0.00015847	4.52117e-05
108	0.000675182	12.498	12.523	0	0	0	0	0	0	0	0	0	0	0	0	0.000420685	0.000379658	0.000458821	0	0	0	0	0	0	0	0	0	0	0	0	5.46253e-05	9.29094e-05	0.000103083
56	0.000678352	3.476	3.852	0	0	0	0.0290767	0.0276091	0.0310813	0	0	0	0	0	0	0.0432238	0.0390511	0.0426323	0	0	0	0	0	0	0	0	0	0	0	0	0.0174655	0.014797	0.0199518
91	0.000678352	16.854	16.971	0	0	0	0.0359498	0.0326384	0.0259715	0	0	0	0	0	0	0.00925818	0.00686728	0.00668496	0	0	0	0	0	0	0	0	0	0	0	0	0.00540642	0.00620215	0.00588626
92	0.000678352	16.854	16.89	0	0	0	0.00935332	0.00824213	0.0067223	0	0	0	0	0	0	0.00223555	0.00177215	0.00177136	0	0	0	0	0	0	0	0	0	0	0	0	0.00138702	0.00155352	0.00143689
71	0.000682	13.657	13.774	0	0	0	0	0	0	0.00603443	0.00440971	0.00389636	0	0	0	0.000798592	0.000703941	0.000762937	0	0	0	0	0	0	0.00168713	0.00129638	0.00144172	0	0	0	0.00119268	0.00119713	0.00106549
51	0.000682	3.534	3.674	0	0	0	0.000494817	0.000473507	0.000523374	0	0	0	0	0	0	0.00134362	0.00120514	0.00126941	0	0	0	0.000815876	0.00107754	0.000626749	0	0	0	0	0	0	0.000557449	0.000565037	0.000550287
74	0.000706454	16.406	16.444	0	0	0	0	0	0	0.000812895	0.000755042	0.000540935	0	0	0	0.000417963	0.000284655	0.000383346	0	0	0	0	0	0	0.00120105	0.000768989	0.00124971	0	0	0	0	0	0
57	0.000706454	2.323	3.754	0	0	0	0.10458	0.101653	0.108061	0	0	0	0	0	0	0.0612443	0.0559859	0.0594905	0	0	0	0	0	0	0	0	0	0	0	0	0.0565811	0.0507904	0.0542445
106	0.000706454	13.606	13.804	0	0	0	0.00116494	0.000939168	0.000760803	0	0	0	0	0	0	0.000471922	0.00050969	0.000865079	0	0	0	0	0	0	0	0	0	0	0	0	0.00715817	0.00680832	0.00596552
89	0.000706454	16.854	16.873	0	0	0	0.00177187	0.00152615	0.00122495	0	0	0	0	0	0	0.000420296	0.000331626	0.000276583	0	0	0	0	0	0	0	0	0	0	0	0	0.000248091	0.000290193	0.000270174
53	0.000707429	2.375	2.562	0	0	0	0.00695797	0.00687624	0.00703072	0	0	0	0.000990373	0.000869782	0.00159774	0.000736466	0.000672274	0.000645873	0	0	0	0	0	0	0.00167068	0.00156271	0.00160719	0	0	0	0.00382043	0.00358322	0.00307485
55	0.000723775	2.375	2.574	0	0	0	0.00874496	0.00839745	0.00852483	0	0	0	0.00172482	0.00208996	0.00254963	0.00100966	0.000600535	0.000601396	0	0	0	0	0	0	0.00161757	0.00214484	0.0015739	0	0	0	0.00486523	0.0042108	0.00387095
99	0.000723819	13.734	13.774	0	0	0	0	0	0	0.00630166	0.00444963	0.00417177	0	0	0	0.00076748	0.000696423	0.000774008	0	0	0	0	0	0	0.00171224	0.00143631	0.00149213	0	0	0	0.000921686	0.000993864	0.000751298
82	0.000723819	13.734	13.774	0	0	0	0	0	0	0.00460085	0.00326188	0.00293447	0	0	0	0.000597145	0.000486514	0.000575404	0	0	0	0	0	0	0.0013041	0.000992626	0.00110692	0	0	0	0.000644323	0.000697568	0.00053918
74	0.000728273	2.135	2.177	0	0	0	0.00176289	0.00174234	0.00192309	0	0	0	0	0	0	0.00186299	0.00169484	0.00171485	0	0	0	0	0	0	0	0	0	0	0	0	0.00026045	0.000238848	0.000274389
95	0.000728273	13.734	13.774	0	0	0	0	0	0	0.00258373	0.00185278	0.00170197	0	0	0	0.000338531	0.000299693	0.000328568	0	0	0	0	0	0	0	0	0	0	0	0	0.000359922	0.000402183	0.000310117
53	0.000728273	13.734	13.774	0	0	0	0	0	0	0.00251347	0.00167849	0.0016032	0	0	0	0.000228961	0.000302523	0.000304886	0	0	0	0	0	0	0	0	0	0	0	0	0.0003414	0.000340851	0.000246094
71	0.000728382	2.375	2.504	0.00463743	0.0052468	0.00459218	0.0383685	0.0366768	0.0378541	0.00129473	0.00146317	0.00148728	0.00563731	0.00772834	0.00963439	0.0043766	0.00404284	0.00393165	0.00130393	0.00103295	0.00114686	0.00281464	0.00352371	0.00201544	0.0103012	0.00977006	0.00999433	0	0	0	0.0226876	0.0219548	0.0190728
81	0.00073622	13.734	13.774	0	0	0	0	0	0	0.00638931	0.00454425	0.00400356	0	0	0	0.000791203	0.000711726	0.000801348	0	0	0	0	0	0	0.00177777	0.00141453	0.00152976	0	0	0	0.000850466	0.000924057	0.000692586
68	0.00073622	13.734	13.774	0	0	0	0	0	0	0.005882	0.00411425	0.00374181	0	0	0	0.000779341	0.000649806	0.000742046	0	0	0	0	0	0	0.00167154	0.0012987	0.0013901	0	0	0	0.000797004	0.000882252	0.000644327
70	0.00074049	13.657	13.774	0	0	0	0	0	0	0.0023115	0.00155732	0.00209402	0	0	0	0.000365754	0.000310838	0.000326643	0	0	0	0	0	0	0.00090981	0.000682114	0.000752095	0.00230064	0.00100152	0.00242706	0.00290121	0.0025025	0.00333618
67	0.000742498	13.734	13.774	0	0	0	0	0	0	0.0062002	0.00414478	0.00374718	0	0	0	0.000755716	0.00066219	0.000761493	0	0	0	0	0	0	0.00176795	0.00135472	0.00150974	0	0	0	0.000712279	0.00078104	0.000560853
57	0.0007429	12.029	12.054	0	0	0	0	0	0	0	0	0	0	0	0	0.00034349	0.00031473	0.000373334	0	0	0	0	0	0	0	0	0	0	0	0	0.000331892	0.000456175	0.000798716
63	0.000743183	16.854	16.873	0	0	0	0.00178414	0.00158223	0.00133983	0	0	0	0	0	0	0.000441199	0.000332687	0.000263009	0	0	0	0	0	0	0	0	0	0	0	0	0.000263826	0.000288062	0.000267967
72	0.000752603	13.692	13.774	0.00141703	0.00201388	0.00210936	0.000661706	0.000642772	0.000713344	0.0183388	0.0131399	0.0120117	0	0	0	0.00233802	0.0020706	0.00239923	0	0	0	0	0	0	0.00483192	0.00406457	0.0043237	0	0	0	0.00277269	0.0030631	0.00225164
50	0.000763437	3.545	3.674	0	0	0	0	0	0	0	0	0	0	0	0	0.000405324	0.000500755	0.000420891	0	0	0	0	0	0	0	0	0	0	0	0	0.000207481	0.000336605	0.000573085
71	0.000771402	3.534	3.674	0	0	0	0.00319485	0.00301496	0.00361048	0	0	0	0	0	0	0.00549856	0.00507496	0.00541315	0	0	0	0.00504774	0.00593004	0.00331917	0	0	0	0	0	0	0.0027026	0.00251314	0.00294926
73	0.000773912	13.685	13.77	0	0	0	0	0	0	0.00201163	0.00148575	0.00128494	0	0	0	0	0	0	0	0	0	0	0	0	0	0	0	0	0	0	0.00180486	0.00170625	0.00123788
92	0.000787931	18.689	18.697	0	0	0	0.000476417	0.000707282	0.000402148	0	0	0	0.000859611	0.00135346	0.00100389	0.000339892	0.000431494	0.000449194	0	0	0	0	0	0	0.0010169	0.000982057	0.00112959	0	0	0	0	0	0
58	0.000796925	2.375	2.612	0.0122376	0.0138806	0.01166	0.111288	0.106938	0.111165	0.00393086	0.00431017	0.00461727	0.0183304	0.0243137	0.0311441	0.0119398	0.0111759	0.0107422	0.00294508	0.00224335	0.00247255	0.00820497	0.0108436	0.00578403	0.0292761	0.0276323	0.0279404	0	0	0	0.0577325	0.0566882	0.0497788
56	0.00082662	8.274	8.313	0.0039336	0.00575153	0.00611922	0.00181695	0.00167507	0.00176697	0.00274403	0.002982	0.00232163	0.00257211	0.00243058	0.00248253	0.000729077	0.000637687	0.000647606	0.00173004	0.00193083	0.00175466	0.00135583	0.00154021	0.00117612	0.00201705	0.0019565	0.00201556	0	0	0	0.00433519	0.003428	0.00390484
89	0.000853952	18.689	18.697	0	0	0	0.000296691	0.000648729	0.000418012	0	0	0	0.00081761	0.00127096	0.000606074	0.000319767	0.000331449	0.000459206	0	0	0	0	0	0	0.000964652	0.000948449	0.00107773	0	0	0	0	0	0
58	0.000945623	13.692	13.77	0	0	0	0	0.000521308	0	0.00651769	0.00459259	0.00432051	0	0	0	0.000873551	0.000741182	0.000814537	0	0	0	0	0	0	0.00179162	0.00144835	0.00158355	0	0	0	0.00348548	0.00356574	0.00236526
56	0.000945623	13.648	13.807	0	0	0	0.000159471	0	0	0.00385583	0.00273854	0.00247938	0	0	0	0.000510325	0.000454758	0.000544116	0	0	0	0	0	0	0.00118951	0.0010015	0.00103335	0	0	0	0.000751997	0.000672523	0.00057028
86	0.000955954	2.144	2.561	0.00144063	0.00170725	0.00143078	0.0171415	0.0166801	0.0169791	0	0.000509669	0.00051232	0.00276643	0.00364256	0.00469905	0.00169596	0.00166927	0.0015795	0	0	0.000768662	0.000885626	0.00119563	0.000645966	0.00520572	0.00400623	0.00412012	0	0	0	0.00989133	0.00940604	0.00841855
85	0.00100067	13.734	13.774	0	0	0	0.000450742	0	0	0.0098724	0.00700974	0.00640944	0	0	0	0.00130017	0.0010545	0.00125314	0	0	0	0	0	0	0.00266853	0.00214188	0.00223602	0	0	0	0.00149208	0.00161929	0.00124631
59	0.00108105	2.239	2.277	0.00204261	0.00252461	0.00266666	0.000828309	0.00137737	0.0011767	0.000902449	0.00110251	0.00090887	0.0013737	0.0014521	0.00144892	0.000558159	0.000507036	0.00048982	0.00185758	0.00178686	0.00163772	0.00194442	0.00268917	0.00149068	0	0.000637936	0	0	0	0	0	0	0
55	0.00111213	13.648	13.774	0.00117132	0.00172276	0.00190627	0.000605791	0.000515787	0.000587887	0.0114508	0.0085898	0.00743045	0	0	0	0.00159631	0.00133544	0.00153088	0	0	0	0	0	0	0.00330383	0.00349892	0.00286148	0.00137643	0.00105371	0	0.00394533	0.00362761	0.00393006
69	0.00116639	8.042	8.421	0.00146455	0.00218596	0.00226721	0.000636601	0.000588724	0.000628472	0.0010575	0.00102379	0.000831303	0.000919532	0.000903103	0.000807379	0	0	0	0	0	0	0	0	0	0	0.000670065	0	0	0	0	0.00243083	0.00167985	0.00217415
65	0.00118358	16.854	16.879	0	0	0	0.00567435	0.00518475	0.00411257	0	0	0	0.00115474	0.000995396	0.000605115	0.00134849	0.00109749	0.00109603	0	0	0	0.00110434	0.00151831	0.000774418	0	0	0	0	0	0	0.000841771	0.000939871	0.000860802
59	0.00121904	2.375	2.504	0	0	0	0.00391289	0.00376975	0.00397019	0	0	0	0	0	0.000835897	0.000379462	0.000343833	0.000334248	0	0	0	0	0	0	0.000867379	0.000857134	0.000852439	0	0	0	0.00208844	0.0020476	0.00182103
55	0.00127245	4.35	4.387	0.00115677	0.00161171	0.0016743	0.000670264	0.000546298	0.000555631	0	0.000570257	0.000490386	0	0	0	0	0	0	0	0	0	0	0	0	0	0	0	0	0	0	0.000827963	0.000744323	0.000846036
55	0.00133852	20.071	20.156	0	0	0	0.000734595	0	0	0	0	0	0	0	0	0	0	0	0	0	0	0	0	0	0.00110407	0.00073221	0.000757884	0.00292281	0.00137139	0.00338033	0.00118096	0.0011478	0.000780603
67	0.00136943	2.375	2.504	0	0	0	0.00270402	0.00265826	0.00267848	0	0	0	0	0	0.000782216	0.000355934	0.000309423	0.00029574	0	0	0	0	0	0	0.00086709	0.000756941	0.000796719	0	0	0	0.00181667	0.00164363	0.00144361
55	0.00142447	8.274	8.306	0.00200867	0.00291278	0.00322925	0.000941565	0.000820029	0.000883219	0.00141262	0.00152662	0.0011638	0.00125106	0.00118818	0.00124066	0.000369837	0.000333749	0.0003329	0	0.000973411	0.000893872	0.000736445	0	0.000583763	0.00103768	0.00096092	0.00103769	0	0	0	0.00212691	0.0016782	0.00189413
79	0.00143767	20.357	20.4	0	0	0	0.00104056	0.000880034	0.000781161	0.00159745	0.00140004	0.00123918	0.00202891	0.00205558	0.00214175	0.000497589	0.000466169	0.000591192	0.00143099	0.00137836	0.0013776	0.00149973	0.00167517	0.001003	0.00144727	0.00126171	0.00144268	0	0	0	8.54575e-05	9.21874e-05	8.38019e-05
68	0.00147524	2.647	2.815	0	0	0	0	0	0	0	0	0	0	0	0	0.000370615	0.000484479	0.000546908	0	0	0	0	0	0	0.00116642	0.0011501	0.000947717	0	0	0	0.000203101	0	9.49802e-05
70	0.00147524	13.293	13.317	0	0	0	0.000498811	0.000446773	0.000522581	0	0	0	0	0	0	0.000329392	0.000387796	0	0	0	0	0	0	0	0	0	0	0	0	0	0.000816927	0.000604246	0.00082526
68	0.00151673	2.375	2.504	0	0	0	0.00257436	0.00244207	0.00254205	0	0	0	0	0	0	0.000342712	0.00029757	0.00029497	0	0	0	0	0	0	0	0.000728828	0.00072918	0	0	0	0.00181518	0.001702	0.00145021
57	0.00156077	13.734	13.84	0.00731953	0.00999639	0.0108572	0.00413884	0.0035075	0.00382768	0.0949451	0.0678838	0.0621991	0.00397857	0.00291399	0.00361343	0.012254	0.0106514	0.0122206	0.0036369	0.00361311	0.00335131	0.00160865	0.00139843	0.0017577	0.0265453	0.020764	0.0220163	0.00387637	0.00152877	0.00354511	0.0162899	0.0152188	0.0117231
69	0.00158966	2.647	2.84	0	0	0	0.00042093	0	0	0	0	0	0	0	0	0.00110659	0.0012568	0.000868063	0	0	0	0	0	0	0.00251699	0.0023541	0.00188024	0	0	0	0.000320458	0.000233073	0.000280711
56	0.00167693	5.329	5.439	0.00340856	0.0043199	0.00494302	0.00231262	0.00128511	0.00147481	0.00101487	0.00100582	0.00081242	0.00141878	0.00141217	0.00175016	0.000576437	0.000487487	0.000495404	0.00179284	0.00151225	0.00139357	0.000688038	0	0.000487003	0.00170791	0.00158807	0.00143593	0.00953906	0.00421617	0.00723499	0.00702124	0.00623443	0.00572451
54	0.00168551	13.662	13.774	0	0	0	0	0	0	0.00531347	0.00368425	0.00322382	0	0	0	0.000663937	0.000598412	0.00067639	0	0	0	0	0	0	0.00150038	0.00116448	0.00133076	0.00106648	0	0	0.000571447	0.000582106	0.000531262
57	0.00172785	2.123	2.176	0	0	0	0.000538323	0.000562426	0.000590531	0	0	0	0	0	0	0.000567492	0.000522781	0.000556053	0	0	0	0	0	0.000481946	0	0	0	0	0	0	7.9565e-05	7.08896e-05	7.72088e-05
82	0.00173434	20.063	20.105	0	0	0	0.000630183	0	0	0	0	0	0	0	0	0	0	0	0	0	0	0	0	0	0	0	0	0.00212619	0.000976345	0.00238317	0.00414595	0.00395789	0.00211585
59	0.00178116	13.689	13.77	0	0	0	0	0.000584074	0.000490721	0.000740251	0.00106402	0.000464676	0	0	0	0	0	0	0	0	0	0	0	0	0	0	0	0	0	0	0.00141271	0.00139189	0.00111956
56	0.00182638	1.547	1.669	0	0	0	0.00182636	0.000480336	0.00124928	0	0	0	0	0	0.000747227	0	0	0	0.00137978	0.00208694	0.00316421	0	0	0	0	0	0	0	0	0	0.000347611	0.000868191	0.000404769
69	0.00184333	13.61	13.774	0	0	0	0	0	0	0.00269234	0.00199383	0.00178404	0	0	0	0.000389574	0.000334545	0.000353502	0	0	0	0	0	0	0	0.000647236	0	0	0	0	0.000847361	0.000690812	0.000560853
57	0.0018638	5.329	5.424	0.00318257	0.0031954	0.0033385	0.00149501	0.000844583	0.000975097	0.000712147	0.000648656	0.000508398	0.000939972	0.00100465	0.00120064	0.000414268	0.00032676	0.000363129	0	0.00099237	0.000868488	0	0	0	0.00109252	0.00103807	0.000999578	0.00507383	0.00233078	0.00666903	0.0047079	0.00414565	0.00380582
69	0.00189529	20.093	20.155	0	0	0	0.000558577	0	0	0	0	0	0	0	0	0	0	0	0	0	0	0	0	0	0	0	0	0.00203416	0.000864801	0.00238779	0.000573486	0.000646137	0.000490237
54	0.00191657	3.534	3.678	0	0	0	0.000870959	0.000912289	0.000999025	0	0	0.000464966	0	0	0.000816006	0.00196148	0.00178011	0.00194542	0	0	0	0.00159347	0.0018489	0.0010089	0.000410453	0.000676829	0	0	0	0	0.000911605	0.000865097	0.000931945
93	0.00209154	20.357	20.39	0.00395656	0.00576003	0.00602537	0.00513346	0.00444855	0.00384394	0.00791697	0.00681128	0.00604964	0.0100219	0.0104088	0.00994066	0.00249951	0.00233403	0.00296992	0.00696992	0.0064901	0.00674084	0.00710019	0.00863356	0.00486025	0.00693037	0.00620645	0.00678526	0.00271391	0.000849169	0	0.00041856	0.0004548	0.000432694
122	0.00211421	20.357	20.486	0.0293987	0.0441154	0.0470889	0.0395757	0.0329297	0.0282757	0.05891	0.0508874	0.0470943	0.0766149	0.0789378	0.076151	0.0185278	0.0174498	0.0236078	0.0529665	0.0490083	0.0507579	0.0543706	0.063487	0.0369725	0.0524024	0.0478714	0.0505937	0.0200972	0	0	0.00318276	0.00352334	0.00346374
69	0.00211655	3.534	3.754	0	0	0	0.00325261	0.00313976	0.00351675	0	0	0	0	0	0	0.00545189	0.00501003	0.00534431	0	0	0	0.00464992	0	0	0	0	0	0	0	0	0.00486375	0.00396564	0.00446733
52	0.00214172	20.356	20.4	0.0010517	0.00156719	0.00145004	0.0012675	0.00104262	0.000717574	0.00193375	0.00167149	0.0020869	0.00196198	0.00415771	0.0035298	0.000637396	0.000569487	0.00072905	0.00170782	0.00159253	0.0016246	0.00175299	0.00189448	0.00120579	0.00245146	0.00149042	0.0014065	0	0	0	9.47263e-05	0.000104753	9.7045e-05
53	0.00215869	3.534	3.852	0	0	0	0.00229493	0.00221367	0.00241646	0	0	0	0	0	0	0.00358637	0.00321763	0.00346407	0	0	0	0.00328419	0	0.00227892	0	0	0	0	0	0	0.00279256	0.00235074	0.00261036
77	0.00217437	20.337	20.407	0.00381883	0.00603365	0.00645225	0.00522247	0.00446831	0.0038372	0.00790364	0.0069579	0.00608683	0.0102442	0.010865	0.0116549	0.00256329	0.00239542	0.00305829	0.00502779	0.00661007	0.00679959	0.00726675	0.00859516	0.00506743	0.00690208	0.00763578	0.00662268	0.00289796	0.000869835	0.00251407	0.000413591	0.000449626	0.000425745
63	0.00217671	20.34	20.417	0.00304064	0.00471907	0.00380869	0.00375114	0.00329435	0.00278886	0.00582031	0.00501782	0.00453738	0.00959432	0.00771141	0.00753003	0.00280401	0.00126538	0.00227832	0.00374705	0.00485343	0.00493141	0.00860542	0.00869889	0.00480783	0.00521178	0.00470821	0.00493421	0.00163049	0	0	0.00029375	0.000320911	0.000312851
191	0.00219792	38.303	38.318	0.00273739	0.00407529	0.00424856	0.00135979	0.00311114	0.00169651	0.00240272	0.00211437	0.00221647	0.00170438	0.00231475	0.0021614	0.00100859	0.00181302	0.00184039	0.00958213	0.00964909	0.0069114	0.00585987	0.00822581	0.00291157	0.00396339	0.00316262	0.00247579	0.018185	0.00676156	0.0250899	0	0	0
77	0.00223135	12.498	12.645	0.0539971	0.0814438	0.0864468	0.00992958	0.0078112	0	0.0266133	0.0195416	0.0186172	0.0350982	0.0325585	0.0441976	0.0695485	0.0667381	0.077771	0.0854406	0.0614262	0.0611019	0.0470526	0.0648348	0.0343579	0.0313382	0.0278375	0.0278389	0.106567	0.0416572	0.105673	0.00865	0.014796	0.0160228
65	0.00223857	20.357	20.436	0.0128105	0.0190964	0.0201051	0.016431	0.0139441	0.0120258	0.0250485	0.021332	0.0191823	0.0320822	0.0331623	0.031663	0.00816442	0.00727515	0.00955168	0.0223316	0.0206514	0.0214247	0.0229906	0.0277578	0.0158808	0.0228287	0.0196145	0.0226347	0.00865832	0.00285379	0.00765079	0.00125044	0.00138396	0.0013177
89	0.00224099	20.357	20.39	0.00304388	0.00459002	0.00477313	0.00386497	0.0033269	0.00283817	0.00598156	0.00514472	0.00455132	0.00770178	0.00802796	0.0075039	0.00123746	0.0017863	0.00232145	0.00537902	0.00505546	0.00493712	0.00540089	0.00652408	0.00374499	0.00410973	0.00477543	0.00491419	0.00146959	0	0	0.000298639	0.000328337	0.000322804
107	0.00226038	12.498	12.546	0.00540171	0.00812807	0.00818382	0.00100675	0.000766416	0.000477105	0.0026359	0.00194279	0.00186713	0.00350285	0.0032234	0.00442992	0.00699229	0.00658616	0.00763688	0.00825453	0.00596547	0.00594451	0.00463694	0.00619637	0.00342757	0.00303684	0.00277834	0.00273702	0.0103249	0.00393029	0.0144353	0.000884531	0.00152377	0.00163716
105	0.00231954	12.498	12.713	0.0655981	0.102668	0.102925	0.0123065	0.00982364	0.00928523	0.0337543	0.0244055	0.0225127	0.0427397	0.0420158	0.0549957	0.085488	0.0821093	0.0961002	0.105415	0.0761713	0.0747741	0.0598351	0.0793532	0.0414425	0.0413649	0.0374945	0.0340602	0.12915	0.0510627	0.128654	0.0108233	0.0191462	0.0205983
63	0.00232358	18.689	18.697	0	0	0	0.000445892	0.000590903	0.000416293	0	0	0	0	0.000766646	0.000873522	0.000318601	0.000429371	0.000289098	0	0	0	0	0	0	0.00100333	0.000949717	0.00101646	0	0	0	0	0	0
51	0.00237512	12.498	12.595	0.0199952	0.0266862	0.0285392	0.00330126	0	0	0.0104092	0.00632944	0.00569246	0.0114972	0.0107931	0.0159465	0.0230183	0.0222967	0.0253043	0.0279435	0.0201371	0.0198626	0.0153839	0.0216616	0.0112744	0.0103826	0.00979965	0.00900199	0.034469	0.0135189	0.0348844	0.00273837	0.0046209	0.00488272
106	0.00238788	12.498	12.713	0.0701776	0.104643	0.109229	0.0126413	0.0100868	0.00855827	0.033967	0.0249247	0.0235167	0.0454547	0.042741	0.0587112	0.0895014	0.0857518	0.100576	0.110403	0.080887	0.0786257	0.0618825	0.0858683	0.0438267	0.0403702	0.0357593	0.0379396	0.135401	0.0529903	0.135685	0.0112956	0.0202036	0.0214857
51	0.00239559	20.326	20.407	0.00381592	0.00587308	0.00606484	0.00499353	0.00408678	0.00358734	0.00749397	0.00631338	0.0055151	0.009603	0.00970697	0.00942158	0.00237536	0.00219586	0.00284669	0.00635636	0.00606264	0.006321	0.00687554	0.00800937	0.00560332	0.0079389	0.00577524	0.00939444	0.00265012	0.000909843	0	0.00036833	0.000400481	0.000390814
91	0.00239821	20.357	20.395	0.0896413	0.13448	0.141406	0.115505	0.0971807	0.083651	0.176822	0.150525	0.137317	0.226273	0.233835	0.223412	0.0556873	0.0520269	0.0676383	0.154927	0.146544	0.150023	0.159765	0.192445	0.109839	0.153482	0.140386	0.148442	0.0621676	0	0	0.00916235	0.0100706	0.00980344
70	0.00240672	3.534	3.674	0	0	0	0.0465424	0.043574	0.0495437	0	0	0	0	0	0	0.076532	0.069805	0.0744402	0	0	0	0.0680482	0	0	0	0	0	0	0	0	0.035144	0.0333244	0.0377425
206	0.00241337	38.304	38.318	0	0	0	0	0.000574049	0	0	0	0	0	0	0	0	0.000334014	0.000333093	0.00170637	0.00176257	0.00123128	0.00104009	0.00150467	0.000513806	0	0	0	0.00334059	0.00122646	0.00448144	0	0	0
92	0.00242153	20.357	20.395	0.0533763	0.0795229	0.0843831	0.0694804	0.0589258	0.0511505	0.10593	0.0902675	0.0816783	0.136158	0.140911	0.1336	0.0333515	0.0305311	0.0406212	0.0924076	0.0869446	0.0904542	0.0965132	0.113352	0.0658929	0.0935424	0.0839194	0.0894499	0.0374787	0	0	0.00554572	0.00615264	0.00593777
55	0.00247915	3.492	3.678	0	0	0	0.0510528	0.0481994	0.0542395	0	0	0	0	0	0	0.0867322	0.0784258	0.083419	0	0	0	0.0792722	0	0.0547677	0	0	0	0	0	0	0.0394754	0.0382161	0.0398663
105	0.00249299	16.388	16.466	0.0021354	0.00307735	0.00360271	0.00104541	0.000852138	0.00130097	0.00267424	0.00351282	0.00281188	0.00157166	0.00133151	0.00116326	0.00109347	0.00110049	0.000786619	0.00257839	0.00206976	0.00135564	0.000979579	0.0014354	0.00114696	0.00459119	0.00454017	0.00382898	0.00357545	0.0012609	0.00240165	0	0	0
57	0.00257329	14.912	14.938	0	0	0	0.000455877	0	0	0	0	0	0	0	0	0	0	0	0	0	0	0	0	0	0	0	0	0.00343487	0.00159951	0.00368988	0.000413082	0.000385355	0.000312167
56	0.00257329	14.912	14.938	0	0	0	0.000477986	0	0	0	0	0	0	0	0	0	0	0	0	0	0	0	0	0	0	0	0	0.00332027	0.00161064	0.00346426	0.000415248	0.000390168	0.00030724
55	0.00257329	14.912	14.938	0	0	0	0.000406666	0	0	0	0	0	0	0	0	0	0	0	0	0	0	0	0	0	0	0	0	0.00267213	0.001307	0.00292141	0.000331765	0.000303945	0.00024504
51	0.00257329	16.854	16.865	0	0	0	0.00114069	0.00122307	0.000930546	0	0	0	0	0	0	0.000317142	0	0	0	0	0	0	0	0	0	0	0	0	0	0	0.000185853	0.000223103	0.000188949
61	0.00257329	12.497	12.559	0	0	0	0	0	0	0	0	0	0	0	0	0.000577895	0.000902262	0.000726932	0	0	0	0.000390115	0	0	0	0	0	0	0	0	5.43705e-05	0.000135574	0.000246379
123	0.00259099	20.357	20.39	0.00269407	0.00388821	0.0043169	0.00347727	0.00295306	0.00247542	0.00516795	0.00460102	0.00410858	0.00666324	0.00685671	0.00668191	0.00163598	0.00153349	0.00200212	0.00456883	0.00423105	0.00441203	0.00483409	0.00567591	0.00326119	0.00467576	0.00424656	0.00448266	0.00207481	0	0	0.000280038	0.00059505	0.000293983
78	0.00274228	12.489	12.575	0.0102716	0.013591	0.014612	0.00168201	0.00134148	0.00115806	0.00461919	0.00335253	0.00301509	0.00590752	0.0058108	0.0073824	0.0116385	0.0109795	0.0127581	0.0145553	0.0101435	0.010324	0.00787998	0.0127793	0.00570311	0.00531858	0.0046169	0.00452439	0.0177214	0.00716693	0.0186773	0.00137767	0.0023561	0.00247766
76	0.00274534	12.498	12.558	0.00284117	0.00437292	0.00437561	0.000517355	0	0	0.00150742	0.00103619	0.000968861	0.00181302	0.00180039	0.00231597	0.00369341	0.00352625	0.00395707	0.0044611	0.0041567	0.00315879	0.00248217	0.00438839	0.00183018	0.001688	0.00146273	0.0014656	0.00575754	0.00228362	0.005946	0.000453469	0.000782828	0.000828264
60	0.00275284	7.089	8.794	0	0	0	0	0	0	0	0	0	0	0	0	0	0	0	0	0	0	0	0	0	0	0	0	0.00314186	0.000747692	0	0.014878	0.0174283	0.0256101
99	0.00275284	14.102	14.127	0	0	0	0	0	0	0	0.000746296	0.000455815	0	0	0	0	0	0	0	0	0	0	0	0	0	0	0	0	0	0	0.00586985	0.00359815	0.00514945
61	0.00275284	9.905	10.079	0	0	0	0.000550447	0.000438637	0	0	0	0	0	0	0	0	0	0	0	0	0	0	0	0	0	0	0	0	0	0	0.00299409	0.0032362	0.00207856
89	0.00275284	12.498	12.523	0	0	0	0	0	0	0	0	0	0	0	0	0.000278933	0.000335871	0.000397594	0	0	0	0	0	0	0	0	0	0	0	0	0	7.13881e-05	7.79635e-05
73	0.00275284	2.149	2.166	0	0	0	0	0	0	0	0	0	0	0	0	0.000362448	0.000311192	0.000329435	0	0	0	0	0	0	0	0	0	0	0	0	0	5.09154e-05	4.64079e-05
75	0.00275457	12.498	12.542	0.0018037	0.00265967	0.0034824	0	0	0	0.00105726	0.00109297	0.000730205	0.00104441	0.000832494	0.00112587	0.00277378	0.00261311	0.00291013	0.00294315	0.00188609	0.00240011	0.00163901	0.00258939	0.00107987	0.000616546	0.00139297	0.00110089	0.0043173	0.00192673	0.00284364	0.000327083	0.000557989	0.000596738
52	0.00275994	12.498	12.555	0.00435034	0.00670394	0.00710339	0.000796073	0.000675899	0.000543204	0.00215287	0.00159834	0.00147726	0.00398333	0.00271671	0.00361391	0.0056825	0.00527956	0.00611322	0.00692403	0.00493874	0.00478481	0.00386199	0.00535717	0.00266596	0.00254672	0.00217507	0.00227655	0.00858267	0.00333097	0.00878809	0.000669168	0.00112901	0.00118301
80	0.00277232	16.397	16.446	0.00174712	0.00268168	0.0029405	0.000971662	0.000618799	0.000696554	0.00279428	0.00289629	0.00238177	0.00102593	0.00131247	0.00123324	0.00125058	0.0012422	0.00157593	0.00190348	0.00181915	0.00197057	0.00148961	0.00157862	0.00102104	0.004319	0.00404829	0.0045174	0.00311928	0.00102881	0.00259107	0	0	0
62	0.00283242	16.406	16.452	0	0	0	0	0	0	0	0.000975131	0.000589306	0	0	0	0.000501769	0.000300046	0.000273598	0	0	0	0	0	0	0.00087344	0.000689089	0.00105819	0	0	0	0	0	0
62	0.00283242	12.498	12.544	0	0	0	0	0	0	0	0	0	0	0	0	0.001614	0.000697926	0.000924766	0	0.000740574	0.000729302	0	0	0	0	0	0	0	0	0	9.1143e-05	0.000148449	0.0002176
69	0.00293249	12.029	12.07	0	0	0	0.000492821	0	0	0	0	0	0	0	0	0.000900579	0.000874044	0.000958942	0	0	0	0	0	0	0	0.000774063	0.000896822	0	0	0	0.000996442	0.00153179	0.00287198
57	0.00294492	11.774	11.848	0	0	0	0	0	0	0	0.00428345	0.000669923	0	0	0	0.000322587	0.000296685	0.000350325	0	0	0	0	0	0	0.00269999	0.000877426	0.000826629	0	0	0	0.00045976	0.000757439	0.00089559
74	0.00295221	12.489	12.577	0.00416379	0.00776691	0.0102941	0.000665557	0.000427304	0.000539106	0.00271545	0.00152821	0.00214471	0.00274515	0.0033707	0.00342219	0.00549059	0.00572158	0.00652833	0.00694866	0.00319513	0.00602009	0.00355439	0.00715617	0.0029237	0.00245233	0.0029559	0.0016974	0.0105942	0.00422041	0.00815515	0.000645725	0.00108743	0.00117679
105	0.00312102	20.367	20.4	0	0	0	0.000587819	0.000506198	0.000427266	0.000933889	0.000778578	0.000539192	0.000965452	0.00109668	0.00101899	0	0	0.000331649	0	0	0	0.000781991	0	0.000533529	0.000832741	0.000700503	0.000735693	0	0	0	0	0	4.43858e-05
56	0.0031562	13.293	13.329	0	0	0	0.000304821	0.000416988	0.000432289	0	0	0	0	0	0	0	0.00059107	0	0	0	0	0	0	0	0	0	0	0	0	0	0.000627729	0.000459063	0.000630002
51	0.00317732	2.375	2.504	0	0	0	0.00303652	0.00286632	0.00293309	0	0	0	0	0	0	0	0.000284213	0	0	0	0	0	0	0	0	0	0.000520533	0	0	0	0.0015819	0.00141719	0.00130507
107	0.00320246	16.397	16.51	0.013706	0.0199032	0.0223391	0.00761725	0.00463961	0.00551453	0.0227053	0.0221666	0.0201084	0.00775106	0.0107246	0.0104588	0.00953147	0.00953116	0.0124136	0.0142964	0.0139044	0.0148154	0.0117343	0.0114667	0.00842723	0.0338592	0.0326273	0.0358251	0.0240311	0.00762265	0.0217881	0	0	0
79	0.00327492	16.397	16.493	0.0186781	0.0270464	0.0310788	0.0103096	0.00648424	0.00759798	0.0299302	0.0302915	0.0257913	0.0104615	0.014731	0.0141731	0.0133592	0.0132907	0.0170214	0.0195537	0.0191821	0.0199727	0.0161303	0.0186031	0.0115239	0.0463616	0.0436417	0.0493175	0.0331247	0.0107252	0.0307572	0	0	0
59	0.00329983	3.476	3.674	0	0	0	0.00080891	0.00131533	0.00118807	0	0	0	0	0	0.000695463	0.00167049	0.00151085	0.00158152	0	0	0	0.000825117	0.00102046	0	0	0	0	0	0	0	0.000643464	0.000543447	0.000960781
69	0.00333441	2.375	2.484	0	0	0	0.0027732	0.00264156	0.00279481	0	0	0	0	0	0.000709842	0.000317045	0.000297835	0.000287654	0	0	0	0	0	0	0	0.000699869	0	0	0	0	0.00395468	0.00640511	0.00303905
85	0.00333441	2.375	2.508	0	0	0	0.0025387	0.00247927	0.00251415	0	0	0	0	0	0.000709123	0.000327642	0.000291378	0.000289194	0	0	0	0	0	0	0	0.000691203	0	0	0	0	0.00182568	0.00178276	0.0015766
57	0.00337131	18.286	18.312	0	0	0	0	0	0	0.000739775	0.000403601	0	0	0	0	0.000460644	0.000387973	0.000416077	0	0	0	0	0	0	0	0	0	0	0	0	6.62033e-05	7.00645e-05	8.20646e-05
78	0.00342462	16.397	16.466	0.00245838	0.00355406	0.00408638	0.00136378	0.000839207	0.000976419	0.00379772	0.00369475	0.00312389	0.00231703	0.00184085	0.00183356	0.00164424	0.00170775	0.00205709	0.00253443	0.00240924	0.00259177	0.00214223	0.00213892	0.0014777	0.00551659	0.00532332	0.00568486	0.00431448	0.00139841	0.0039948	0	0	0
104	0.00353448	20.357	20.39	0.0023921	0.00369712	0.00397232	0.00294594	0.00258533	0.00210896	0.00457536	0.00363718	0.00331301	0.00566419	0.00603796	0.00568065	0.00147322	0.00133986	0.00168713	0.00396639	0.00382551	0.00389608	0.00403383	0.00509371	0.00278328	0.0040064	0.00350125	0.00367436	0.00176204	0	0	0.000210395	0.000227881	0.00022163
108	0.00354685	16.397	16.493	0.0200912	0.0289257	0.0325341	0.0111798	0.00682946	0.00830524	0.0321481	0.0326324	0.027945	0.0110887	0.0157005	0.015397	0.0145477	0.0142003	0.0183091	0.0210948	0.0200346	0.0217205	0.0170907	0.0173899	0.0119821	0.0493852	0.0474476	0.0521684	0.0357246	0.0111738	0.0318044	0	0	0
175	0.00356952	27.232	27.243	0.00595908	0.0100404	0.00877818	0.00285308	0.00609137	0.00686547	0.00379319	0.00387078	0.00267069	0.00361625	0.00306024	0.00428925	0.000601909	0.000968074	0.00135307	0.00579063	0.00530192	0.00399505	0.00274291	0.00411919	0.00173949	0.0030758	0.00351287	0.00339287	0.0214296	0.00853832	0.0283116	0	0	0
77	0.00359234	16.397	16.486	0.0114423	0.0169765	0.0189039	0.00626702	0.00395572	0.00462761	0.0178777	0.0179102	0.0156942	0.00660136	0.00888399	0.00862211	0.0076995	0.00794769	0.0100944	0.0120687	0.0117046	0.0121166	0.00982792	0.0100359	0.00695459	0.0269101	0.0261655	0.0281773	0.0204026	0.00641103	0.0188351	0	0	0
91	0.00362682	16.397	16.446	0.00321523	0.00483963	0.00542765	0.00185218	0.00116263	0.00138346	0.00515723	0.00499413	0.00437396	0.00199979	0.00246734	0.00246192	0.00225558	0.00228361	0.00286036	0.00373497	0.00322861	0.00349706	0.0028153	0.0028769	0.00203213	0.00780179	0.00734789	0.00832081	0.00609459	0.0019466	0.00543086	0	0	0
53	0.00366057	1.568	1.669	0	0	0	0	0	0	0	0	0	0	0	0	0	0.000179568	0	0	0	0	0	0	0	0	0	0	0	0	0	0.0218982	0.0165749	0.0123818
53	0.00366057	1.965	2.176	0	0	0	0	0	0	0	0.000457351	0	0	0	0	0	0	0	0	0	0	0	0	0	0	0	0	0	0	0	0.00598378	0.00544454	0.00434111
72	0.00366057	14.102	14.127	0	0	0	0	0	0	0	0.000629891	0	0	0	0	0	0	0	0	0	0	0	0	0	0	0	0	0	0	0	0.00515026	0.00315297	0.00452791
71	0.00366057	14.102	14.127	0	0	0	0	0	0	0	0.000656289	0	0	0	0	0	0	0	0	0	0	0	0	0	0	0	0	0	0	0	0.0045805	0.00278919	0.00396408
70	0.00366057	9.746	9.788	0	0	0	0	0	0	0	0	0	0	0	0	0	0	0	0	0	0	0	0	0	0	0	0	0.00160283	0	0	0.00225422	0.00170157	0.00192629
57	0.00366057	15.234	15.269	0	0	0	0	0	0	0.00312297	0.00189715	0.00227646	0	0	0	0	0	0	0	0	0	0	0	0	0	0	0	0	0	0	0	0	5.92238e-05
97	0.00366057	13.648	13.774	0	0	0	0	0	0	0	0	0.000427345	0	0	0	0	0	0	0	0	0	0	0	0	0	0	0	0	0	0	0.000908643	0.000734439	0.000939677
57	0.00366057	17.698	17.741	0	0	0	0	0	0.000412856	0	0	0	0	0	0	0	0	0	0	0	0	0	0	0	0	0	0	0	0	0	0.000530518	0.0005622	0.000535833
60	0.00366057	9.905	9.993	0	0	0	0.000212676	0	0	0	0	0	0	0	0	0	0	0	0	0	0	0	0	0	0	0	0	0	0	0	0.000396089	0.000406274	0.000353677
50	0.00366057	16.854	16.862	0	0	0	0.00042307	0.000296977	0.000325605	0	0	0	0	0	0	0	0	0	0	0	0	0	0	0	0	0	0	0	0	0	5.12968e-05	0	0
269	0.00366057	21.142	21.149	0	0	0	0	0	0	0	0	0	0	0	0	0.000368476	0.00043627	0.00014941	0	0	0	0	0	0	0	0	0	0	0	0	9.33248e-05	0	0
103	0.00371907	20.357	20.398	0.00277715	0.00608467	0.00410996	0.00347314	0.00301191	0.00255897	0.00545328	0.00456365	0.00404191	0.00678281	0.00729464	0.0067931	0.00167924	0.00155826	0.00204496	0.00510703	0.00452017	0.00449018	0.00472099	0.00602623	0.00346128	0.00482932	0.00416666	0.00461967	0.00201497	0	0	0.000272553	0.000300335	0.000287561
108	0.00382138	14.129	14.167	0	0	0	0.000602511	0.000514189	0.00103934	0	0	0	0	0	0.00069067	0	0	0	0	0	0	0	0	0	0	0	0	0	0	0	0.000105795	9.34938e-05	0.000131947
78	0.00383913	20.357	20.414	0.0033675	0.00770638	0.00499114	0.00424525	0.0041834	0.00300593	0.00642242	0.00544066	0.0047833	0.00818114	0.00813454	0.0082425	0.00207406	0.00190643	0.00242494	0.00568676	0.0052246	0.00533756	0.00581103	0.00706285	0.00397913	0.00539016	0.00499907	0.00544365	0.0019619	0	0	0.000325522	0.000348139	0.00033609
73	0.00390791	2.239	2.277	0.00137532	0.00171475	0.00173446	0.000557864	0.000938442	0.000822407	0	0.00073755	0.000605429	0.000942212	0.000901516	0.00089557	0.000338823	0.000340471	0.000309026	0	0.000897872	0.00107442	0.00127882	0.00193935	0.000930009	0	0	0	0	0	0	0	0	0
109	0.00400237	16.397	16.446	0.00157092	0.00225649	0.00251939	0.000868962	0.00056199	0.000622523	0.00244845	0.00244928	0.00206627	0.000855971	0.00100968	0.00115439	0.00108812	0.00105069	0.00137695	0.00161119	0.00132592	0.00165826	0.00131711	0.00137725	0.00146843	0.00381618	0.00350611	0.0040316	0.00269697	0.000843075	0.00246094	0	0	0
51	0.00422395	16.397	16.466	0.00361159	0.00543189	0.00613221	0.00270074	0.00123891	0.0014333	0.0055676	0.00556359	0.00587359	0.00312288	0.00280266	0.00274998	0.0025104	0.00236587	0.00316227	0.0037973	0.00364807	0.00376545	0.00302917	0.00263354	0.00214457	0.00837677	0.00790761	0.00848338	0.00625831	0.0015648	0.00550478	0	0	0
50	0.00424021	2.387	2.504	0	0	0	0.00142611	0.000370495	0.00182804	0	0	0	0	0	0	0.00018871	0	0	0	0	0	0	0	0	0	0.000613627	0	0	0	0	0.00144657	0.00108765	0.000619009
102	0.00428744	20.358	20.4	0	0	0	0.000766118	0.000623739	0.000507643	0.00108346	0.000756792	0.000835516	0.00243771	0.00150738	0.00139572	0.000356907	0.000312961	0.000427919	0	0.000893429	0.000998262	0.00102381	0.00102621	0.00066434	0.000645699	0.000853118	0.00089441	0	0	0	5.60108e-05	6.60249e-05	0.000118732
53	0.0045681	12.48	12.544	0	0	0	0	0	0	0	0	0	0	0	0	0.000773022	0.00055781	0.000737714	0	0	0.000882179	0	0	0	0	0	0	0	0	0	9.24967e-05	0.000235686	0.000504036
81	0.00489129	20.071	20.156	0	0	0	0.000435194	0	0	0	0	0	0	0	0	0	0	0	0	0	0	0	0	0	0	0	0	0	0	0	0.000454234	0.000435239	0.000315528
54	0.00489129	10.458	10.52	0	0	0	0	0	0	0	0	0	0	0	0	0.000140974	0	0	0	0	0	0	0	0	0	0	0	0	0	0	0.00071032	6.58015e-05	0.000431526
66	0.00493427	20.357	20.39	0	0	0.00146303	0.00113727	0.000897324	0.000812757	0.00175822	0.00138573	0.00131225	0.00208715	0.00232823	0.00219111	0.000542797	0.000512874	0.000658003	0.00149138	0.0014376	0.00149996	0.00153824	0.0017387	0.00101969	0.00153992	0.00128581	0.00137297	0	0	0	8.60308e-05	9.39579e-05	8.56815e-05
65	0.00503034	18.689	18.703	0	0	0	0.000775818	0.00148968	0.000900008	0.00115492	0.000764584	0.000476587	0.00176094	0.00273232	0.00201282	0.000674729	0.000888109	0.000935452	0.00157013	0.00114078	0.00105645	0.00105945	0.00116655	0.000550555	0.00208229	0.00206431	0.00230718	0.00173155	0.000857647	0.0025441	0	0	0
69	0.00542	14.912	14.938	0	0	0	0	0	0	0	0	0	0	0	0	0	0	0	0	0	0	0	0	0	0	0	0	0.00201723	0.000960978	0	0.000242995	0.000233709	0.000182655
56	0.00542	18.457	18.474	0	0	0	0	0	0	0	0	0	0	0	0	0	0	0	0	0	0	0	0	0	0.000906923	0.000762648	0	0	0	0	0.000281854	0.000279742	0.000303395
64	0.00542	16.854	16.864	0	0	0	0.000476417	0.00044503	0	0	0	0	0	0	0	0	0	0	0	0	0	0	0	0	0	0	0	0	0	0	7.44847e-05	8.12549e-05	7.45744e-05
91	0.00542	4.299	4.308	0	0	0	0.000418933	0	0.000393555	0	0	0	0	0	0	0	0	0	0	0	0	0	0	0	0	0	0	0	0	0	5.58834e-05	5.74474e-05	3.8106e-05
58	0.00560845	3.534	3.674	0.0012599	0.00151366	0.00186103	0.00219081	0.00207666	0.00228915	0.000786457	0.000618441	0.000671085	0.000915892	0.00095996	0.00195578	0.00324249	0.00286778	0.00320722	0	0.000978151	0.000977726	0.00263069	0.0033166	0.00183709	0.000943004	0.000822256	0.000852439	0.00176994	0	0	0.00122703	0.0010651	0.00139538
92	0.00577392	16.406	16.437	0	0	0	0	0	0	0	0.000576618	0.000498811	0	0	0	0	0.000262894	0.000319519	0	0	0	0	0	0	0.000895377	0.000854597	0.000873907	0	0	0	0	0	0
70	0.00621001	20.093	20.139	0	0	0	0.0006938	0	0	0	0	0	0	0	0	0	0	0	0	0	0	0	0	0	0.00100708	0.000645757	0	0.00234807	0.00115042	0.00289523	0.000427988	0.000452703	0.000279999
98	0.00621001	20.093	20.105	0	0	0	0.000669979	0	0	0	0	0	0	0	0	0	0	0	0	0	0	0	0	0	0.00103364	0.000641106	0	0.00235879	0.00117797	0.00275432	0.00041899	0.000458479	0.00020927
75	0.00663033	20.364	20.4	0	0	0	0.000597518	0.000353932	0.000494952	0.000942225	0.000806248	0.000617195	0.0012379	0.00124689	0.00116613	0	0.000278197	0.000373815	0	0	0	0.000408378	0	0.000424463	0	0.000719739	0.000795513	0	0	0	0	5.29781e-05	4.80882e-05
176	0.00683505	27.234	27.24	0	0	0	0	0.000904589	0.00102441	0	0.00057789	0	0	0	0	0	0	0	0	0	0	0	0	0	0	0	0	0.00283755	0.00124315	0.00438057	0	0	0
64	0.00695687	20.328	20.436	0	0	0.000586656	0.00155991	0.000923913	0.000771908	0.00164199	0.00137889	0.00119633	0.00205271	0.00208785	0.00207321	0.00041281	0.000465373	0.000763129	0	0.00142309	0.00139557	0.00156926	0.00129039	0.00100991	0.00181009	0.00124924	0.00136139	0	0	0	8.24316e-05	8.67727e-05	8.76181e-05
120	0.00712112	16.854	16.897	0	0	0	0.00936516	0.00824751	0.00685132	0	0	0	0.00286472	0	0	0.00224284	0.00178754	0.00172515	0	0	0	0.00275985	0	0	0	0	0	0	0	0	0.00145684	0.00167297	0.00157026
57	0.00732073	14.102	14.143	0.0015276	0.00203339	0.00238368	0.000942992	0.00108461	0.00150865	0.00150766	0.00147701	0.000820699	0.00140814	0.00145766	0.00118051	0.000717021	0.000613981	0.000549122	0	0.00159046	0.00121046	0.0011336	0	0.000772058	0.0024252	0.00114249	0.00185467	0.00235428	0.0020131	0.00235853	0.00653371	0.00401547	0.00580592
90	0.00739336	20.303	20.409	0.00102777	0.00146314	0.00239138	0.00236554	0.0010756	0.00225623	0.0023115	0.00333138	0.00186844	0.00393993	0.00359681	0.00410567	0.00093519	0.000860864	0.000647702	0	0.000732576	0.000816008	0.00265006	0	0.00188143	0.0013575	0.00235157	0.00160212	0	0	0	8.66042e-05	9.64848e-05	0.000108451
57	0.00744585	27.232	27.24	0.00133297	0.00202589	0.00184611	0.000553585	0.0012684	0.00140038	0.000840762	0.000839643	0.000579719	0	0	0.00095045	0	0	0.000284381	0	0.00110375	0.000842248	0	0	0	0	0.000694796	0.000719773	0.0043286	0.00174974	0.00618008	0	0	0
89	0.00765691	16.397	16.45	0.00131842	0.00153367	0.000885037	0.000858834	0.000956894	0.0006175	0.00248751	0.00250796	0.00205567	0.000883691	0.00120828	0.00119585	0.00109755	0.00105715	0.00136116	0.00187256	0.001493	0.00162289	0.00136882	0.00110051	0.000949563	0.0031673	0.00357143	0.0038408	0.00275625	0.00065019	0.00252177	0	0	0
190	0.00778763	27.233	27.24	0.00105073	0.00175277	0.00154436	0.00047228	0.00114287	0.00125245	0	0.000618918	0.000501861	0	0	0.000776464	0	0	0	0	0.00100363	0	0	0	0	0	0.000622505	0	0.00369176	0.00154811	0.00507435	0	0	0
119	0.00792173	18.681	18.742	0.00474282	0.00529833	0.00572218	0.00543515	0.00838001	0.00520757	0.00673181	0.00420155	0.00412834	0.0100703	0.0158282	0.0113963	0.00383468	0.00523144	0.00540698	0.00921883	0.00689445	0.00590515	0.00611445	0.0100682	0.00352112	0.0119652	0.0123093	0.013475	0.0083224	0.00625047	0.0147017	0	0	0
63	0.00797322	12.489	12.551	0.000783035	0.00123354	0.00172868	0	0	0	0	0	0.00042197	0	0	0.000961953	0.00157492	0.00172721	0.00171129	0.00198174	0.00116537	0.000906707	0.000835019	0.00155385	0.00066788	0	0.000619546	0	0.00240452	0.00124448	0.000834688	0.000197814	0.000322475	0.00033142
90	0.00815242	16.397	16.446	0.00158644	0.00226349	0.00256319	0.000873954	0.000533077	0.000667471	0.00245321	0.00249301	0.00212452	0.000594728	0.00127386	0.00117476	0.00108696	0.00115012	0.00144934	0.00166675	0.00108539	0.0017133	0.00133405	0.00110302	0.000959341	0.00390335	0.00362786	0.00422915	0.00282965	0.000921765	0	0	0	0
74	0.00817263	20.357	20.4	0	0	0	0.00126208	0.000710333	0.000450665	0.000953895	0.000885759	0.000880981	0.00234923	0.00135003	0.000811453	0.000323364	0.000300489	0.000478556	0	0.000969856	0.000653434	0.00139698	0.00131192	0.000593709	0.00112572	0.000942741	0.000849545	0	0	0	5.7476e-05	5.13795e-05	6.07474e-05
72	0.00820428	1.748	2.044	0	0	0	0	0	0	0	0.0249822	0	0	0	0	0	0	0	0	0	0	0	0	0	0	0	0	0	0	0	0.00191875	0.00279926	0.00222191
105	0.00820428	3.522	3.543	0	0	0	0	0	0	0	0.00117407	0	0	0	0	0	0	0	0	0	0	0	0	0	0.000701985	0.00111861	0.00087463	0	0	0	0	0	0
68	0.00820428	16.07	16.081	0	0	0	0	0	0	0	0	0	0	0	0	0	0	0	0	0	0	0	0	0.000649506	0	0	0	0	0	0	0.000417844	0.00028722	0.000401793
55	0.00820428	18.457	18.474	0	0	0	0	0	0	0	0	0	0	0	0	0	0	0	0	0	0	0	0	0	0.000851503	0	0	0	0	0	0.000255321	0.000246721	0.000258739
93	0.00820428	16.07	16.081	0	0	0	0	0	0	0	0	0	0	0	0	0	0	0	0	0	0	0	0	0.00057112	0	0	0	0	0	0	0.000352357	0.000250915	0.000337799
95	0.00820428	20.093	20.139	0	0	0	0.000440044	0	0	0	0	0	0	0	0	0	0	0	0	0	0	0	0	0	0	0	0	0	0	0	0.000290772	0.000292634	0.000203374
61	0.00820428	16.406	16.415	0	0	0	0	0	0	0	0	0	0	0	0	0.000152252	0.000195225	0.000271865	0	0	0	0	0	0	0	0	0.000570946	0	0	0	0	0	0
55	0.00820428	2.679	2.731	0	0	0	0	0	0	0	0.000825967	0	0	0	0	0	0	0	0	0	0	0	0	0	0	0	0	0	0	0	0.000145848	9.58316e-05	0.000102841
93	0.00820428	19.852	19.859	0	0	0	0	0	0	0	0	0	0	0	0	0	0	0	0	0	0	0	0	0.000948383	0	0	0	0	0	0	6.62988e-05	5.28234e-05	6.15022e-05
96	0.00820428	20.083	20.099	0	0	0	0.000417079	0	0	0	0	0	0	0	0	0	0	0	0	0	0	0	0	0	0	0	0	0	0	0	0.000254573	0.000266609	0.000117394
73	0.00820428	2.679	2.688	0	0	0	0	0	0	0	0.000664876	0	0	0	0	0	0	0	0	0	0	0	0	0	0	0	0	0	0	0	6.93407e-05	7.7095e-05	8.06691e-05
100	0.00820428	13.742	13.774	0	0	0	0	0	0	0	0.000478024	0	0	0	0	0	0	0	0	0	0	0	0	0	0	0	0	0	0	0	9.04104e-05	0.000103567	7.42042e-05
108	0.00820428	10.113	10.194	0	0	0	0.000480411	0	0	0	0	0	0	0	0	0	0	0	0	0	0	0	0	0	0	0	0	0	0	0	5.89889e-05	8.38333e-05	7.44605e-05
85	0.00820428	12.48	12.536	0	0	0	0	0	0	0	0	0	0	0	0	0	0	0.000303634	0	0	0	0	0	0	0	0	0	0	0	0	6.16963e-05	0.000108758	0.000106529
76	0.00844864	20.359	20.4	0	0	0	0.000585822	0.000482515	0.000441015	0.000888159	0.000737232	0.000695634	0.00116369	0.0012543	0.000948293	0	0.000277401	0.000357738	0	0	0	0.000791233	0	0.000590675	0	0.000569661	0.000799131	0	0	0	0	5.07435e-05	4.68635e-05
71	0.00856388	13.293	13.346	0.00163041	0.00243557	0.00180617	0.000994199	0.00163149	0.00125734	0.000937699	0.00120937	0.000962179	0.000961812	0.000988785	0	0.000369059	0.000443081	0	0.00128316	0.00136621	0.000980864	0.000900148	0.0019354	0.000660632	0	0.000976139	0.000802026	0	0	0	5.60108e-05	0	5.74011e-05
62	0.00863592	20.326	20.4	0	0.00147915	0.00149383	0.00189554	0.00079591	0.00122905	0.00184134	0.00150675	0.00197011	0.00373917	0.00234622	0.00221915	0.000397546	0.000409645	0.000579158	0.00164839	0.000493815	0.00118223	0.00191339	0.0021644	0.00114174	0.00215012	0.00140164	0.00208117	0.00106874	0	0	6.53592e-05	9.26859e-05	6.05623e-05
120	0.00875849	20.343	20.395	0	0.00150316	0.00153329	0.00080135	0.00076569	0.000557481	0.00138571	0.00103429	0.00146433	0.00173798	0.0032755	0.00165118	0.000302656	0.00036692	0.000455259	0.00146046	0.00084544	0.00117224	0.000950975	0.00303878	0.000843532	0.00116642	0.00103934	0.00104951	0	0	0	4.60891e-05	0	0
57	0.00926519	13.293	13.343	0.00132198	0.00193535	0.0018413	0.000821177	0.00132361	0.00100947	0.000815039	0.00093617	0.000775234	0	0	0	0.000337948	0.000380012	0	0	0.00106761	0.000971452	0.000759988	0.00158292	0.00060888	0	0.000813379	0	0	0	0	0.000184914	0.000135385	0.000191
53	0.00936507	20.358	20.4	0	0	0	0.00055601	0.000455636	0.000408758	0.000812181	0.000557217	0.000438094	0.00202471	0.000769555	0.00103888	0.000292447	0	0.000312395	0	0	0	0.000801134	0	0.000545497	0	0.000444103	0	0	0	0	4.60254e-05	0	4.57528e-05
71	0.00970218	11.774	11.802	0	0	0	0	0	0	0	0.00400898	0.000593518	0	0	0	0	0	0	0	0	0	0	0	0	0.00244367	0.000953099	0.00076295	0	0	0	6.77799e-05	0	0
82	0.00970218	5.346	5.433	0	0	0	0.000616917	0	0	0	0	0	0	0	0	0	0	0	0	0	0	0	0	0	0	0	0	0.00186479	0.000803067	0	0.00173263	0.0015453	0.00146167
55	0.00970218	5.329	5.379	0	0	0	0.000516784	0	0	0	0	0	0	0	0	0	0	0	0	0	0	0	0	0	0	0	0	0.00185519	0.000835126	0	0.00140366	0.00121889	0.00112564
60	0.0105073	3.539	3.674	0	0	0	0	0	0.000425283	0	0	0	0	0	0	0.000599965	0.000560199	0.000653286	0	0	0	0.000621588	0	0	0	0	0	0	0	0	0.000373777	0.00037829	0.000416247
59	0.0110237	1.488	1.669	0	0	0	0	0	0.00560258	0	0	0	0	0.0109491	0.0104691	0.00702982	0.00736502	0.00499052	0	0.0138037	0.0135005	0.016582	0.0138931	0.0258638	0	0	0	0	0	0	0.000923374	0.000892325	0.000658681
65	0.0112727	16.397	16.444	0.00134364	0.00187882	0.00199338	0.000560717	0	0.000501694	0.00155267	0.00200353	0.00165084	0	0.000898872	0.000704809	0.000905829	0.00134119	0.00112722	0	0.00103621	0.00145433	0.00113316	0	0.000743063	0.00302702	0.00289016	0.00308412	0.00221821	0	0.00158082	0	0	0
55	0.01234	1.559	1.583	0	0	0	0.00125124	0	0.000912038	0	0	0	0	0	0	0.0002871	0.00036922	0	0.0018658	0.00159905	0.00216537	0	0	0.000977715	0	0	0	0	0	0	0.000251802	0.000464426	0.000191014
58	0.0124979	1.477	1.669	0	0	0	0	0	0	0	0	0	0	0.0147495	0.0144044	0.0133235	0.0181833	0.00661343	0	0	0	0.0144019	0	0.0309883	0	0	0	0	0	0	0.00672459	0.00811777	0.00534617
120	0.012759	18.689	18.742	0.0030733	0.00471707	0.00508595	0.00472081	0.00745523	0.0043611	0.00599561	0.00369777	0.00418934	0.00886379	0.0138247	0.0100715	0.00337112	0.0045712	0.00478036	0.00822313	0.00601376	0.00526227	0.0052143	0.00864218	0.00327433	0.0107714	0.0110411	0.011636	0.010623	0.00438918	0.0124002	0	0	0
76	0.0131423	16.384	16.424	0	0	0	0	0	0	0	0.000639591	0.00055212	0	0	0	0	0.000284124	0.000363418	0	0	0	0	0.00055492	0	0.000947045	0.000866434	0.000966773	0	0	0	0	0	0
57	0.0137091	38.304	38.314	0	0	0	0	0	0	0	0	0	0	0	0	0	0.000266167	0	0	0.00130726	0.000881608	0.000764169	0.00107789	0	0	0	0	0.00242598	0.000914877	0.0032425	0	0	0
63	0.014152	16.397	16.444	0.00107401	0.00134159	0.00149431	0.000525342	0	0.000450136	0.00166533	0.00161663	0.00225075	0	0	0.000846442	0.001026	0.000603719	0.000725295	0	0.000731095	0.000903855	0.000952075	0	0.000491049	0.00200002	0.00238454	0.00214678	0.00196359	0	0	0	0	0
91	0.014875	18.689	18.707	0.00282306	0.00436192	0.00492088	0.00449629	0.0067927	0.00419863	0.00572575	0.00353541	0.00344505	0.00847235	0.0129777	0.00943883	0.00313652	0.00432661	0.0045187	0.00784146	0.00570183	0.00497249	0.00504664	0.00804024	0.00303328	0.00987224	0.0100609	0.0109715	0.00997378	0.00425459	0.0121099	0	0	0
192	0.0150981	38.304	38.318	0	0	0	0	0.000458251	0	0	0	0	0	0	0	0	0	0	0	0.00141479	0.000979438	0.000810815	0.00115902	0	0	0	0	0.0026168	0.000914347	0.0036352	0	0	0
72	0.0162562	5.329	5.382	0.00101969	0	0	0.000687381	0	0.000413517	0	0	0	0	0	0	0	0	0	0	0	0	0	0	0	0	0	0	0.00229443	0.00104258	0	0.00213125	0.00193489	0.00177448
121	0.0162562	18.689	18.696	0	0	0	0	0.000625192	0	0	0	0	0	0.0012104	0.000866812	0	0.000388415	0.000396438	0	0	0	0	0	0	0.000919912	0.000920547	0.0010114	0	0	0	0	0	0
59	0.0181911	1.965	2.166	0.000952444	0	0	0.000915177	0.00083572	0.00121213	0	0.00132816	0	0.000849811	0	0.00129339	0.000924301	0.000798944	0.000481444	0.00154839	0.00111708	0.00128462	0.00140292	0.00200252	0.00144499	0	0	0	0	0	0	0.000146182	0.000132291	0.000129113
81	0.0184862	14.307	14.328	0	0	0.00153522	0.000481409	0	0.000285417	0	0	0	0	0	0.000705528	0	0	0	0	0	0	0	0	0	0	0	0	0	0	0	0.00316884	0.00310603	0.00409927
53	0.0190745	16.397	16.444	0.00115645	0.00157769	0.00178499	0.000629612	0	0.000458465	0.00174321	0.00175975	0.00151183	0	0.000778546	0.000822717	0.000801119	0.00076878	0.000941132	0	0.00114078	0.001152	0.000973418	0	0.00115674	0.00250833	0.0025287	0.0027568	0.00183882	0	0	0	0	0
50	0.0194693	20.328	20.418	0	0	0.0013995	0.00156961	0.000391562	0.000907676	0.00338329	0.00130224	0.0019078	0.00315816	0.00324165	0.0017063	0.000433616	0.00029527	0	0	0	0.000752119	0.0016696	0	0	0.00115343	0.00138663	0.00166677	0	0	0	9.68603e-05	0.000107795	0.000196596
57	0.0211407	15.373	15.442	0.00123727	0.00184681	0.0015973	0.00078295	0.00119924	0.000980253	0.00094413	0.000894665	0.000785547	0	0.000792297	0	0.000354962	0.000429636	0.000295644	0	0.00121276	0.000982575	0.00077561	0.00181372	0.000493577	0	0.000859036	0.000740276	0	0	0	0	0	5.2531e-05
52	0.0220032	3.514	3.674	0	0	0	0.000206257	0	0.000192217	0	0	0	0	0	0.00041675	0	0	0	0	0	0	0	0	0	0	0	0	0	0	0	0.000173447	0.000105165	0.000261972
73	0.0223402	20.345	20.4	0	0	0	0	0	0.000233595	0	0	0	0.000665008	0.000567249	0.000969861	0.000297406	0	0.000263683	0	0	0	0	0.000839559	0.000838475	0	0.000324041	0.000343725	0	0	0	0	0	0
73	0.0229108	1.956	1.974	0	0	0	0	0	0	0	0.00116993	0	0	0	0	0	0	0	0.00189285	0.00129808	0.00124269	0	0	0	0.00114159	0	0	0	0	0	0	4.69961e-05	0
87	0.0236135	13.314	13.343	0.00120624	0.0018333	0.00166997	0.000670835	0.00120011	0.000824523	0	0.000869539	0.000686047	0	0	0	0.000277767	0.00031588	0	0	0.000702657	0	0	0.00134566	0.000498972	0	0.000588474	0	0	0	0	0	0	0
60	0.0249436	1.568	1.642	0	0	0	0	0	0	0	0	0	0	0	0	0.000264836	0.000266433	0	0	0	0	0	0	0.00156873	0	0	0	0	0	0	0.000197861	0.000125879	8.55961e-05
67	0.0252153	3.476	3.674	0	0	0	0	0.000457816	0.000425547	0	0	0.00043911	0	0	0	0.000484755	0.000647063	0.000440819	0	0	0	0.000656793	0	0	0	0	0	0	0	0	0.000315027	0.000255213	0.000444655
82	0.0286184	15.293	15.297	0	0	0	0	0	0	0.000693807	0	0.000550086	0	0	0	0	0	0	0	0	0	0	0	0	0	0	0	0	0	0	0	0	0
55	0.0286184	6.967	6.99	0	0	0	0	0	0	0	0	0	0	0	0	0	0	0	0	0	0	0	0	0	0	0	0	0	0	0	0.000984497	0	4.30615e-05
105	0.0286184	13.606	13.653	0	0	0	0.000702644	0	0.000247872	0	0	0	0	0	0	0	0	0	0	0	0	0	0	0	0	0	0	0	0	0	0	0	0
59	0.0286184	13.316	13.317	0	0	0	0	0.000526103	0.000407436	0	0	0	0	0	0	0	0	0	0	0	0	0	0	0	0	0	0	0	0	0	0	0	0
89	0.0286184	15.373	15.378	0	0	0	0	0.000504745	0.0004077	0	0	0	0	0	0	0	0	0	0	0	0	0	0	0	0	0	0	0	0	0	0	0	0
113	0.0286184	12.928	12.939	0	0	0	0	0.000478883	0.000411666	0	0	0	0	0	0	0	0	0	0	0	0	0	0	0	0	0	0	0	0	0	0	0	0
69	0.0286184	6.774	6.783	0	0	0	0	0	0	0	0	0	0	0	0	0	0	0	0	0	0	0	0	0	0	0	0	0	0	0	0	0.000726085	5.90956e-05
55	0.0286184	3.841	3.845	0	0	0	0	0	0	0	0	0	0	0	0	0	0	0	0	0	0	0	0	0	0	0	0	0	0	0	0	0.000384805	0.000297856
56	0.0286184	6.87	6.99	0	0	0	0	0	0	0	0	0	0	0	0	0	0	0	0	0	0	0	0	0	0	0	0	0	0	0	0.000483681	0	0.000180534
54	0.0286184	10.33	10.384	0	0	0	0	0	0	0	0	0	0	0	0	0	0	0	0	0	0	0	0	0	0	0	0	0	0	0	5.14242e-05	0.000595118	0
74	0.0286184	7.97	8.175	0	0	0	0	0	0	0	0	0	0	0	0	0	0	0	0	0	0	0	0	0	0	0	0	0	0	0	0.000521775	0	0.000119402
205	0.0286184	22.977	23.045	0	0	0	0	0	0	0	0	0	0	0	0	0	0	0	0	0	0	0	0	0	0	0	0	0	0	0	0	0.000364813	0.0002222
98	0.0286184	36.63	36.668	0	0	0	0	0	0	0	0	0	0	0	0	0	0	0	0	0	0	0	0	0	0	0	0	0	0	0	0	5.62097e-05	0.00049646
57	0.0286184	36.63	36.668	0	0	0	0	0	0	0	0	0	0	0	0	0	0	0	0	0	0	0	0	0	0	0	0	0	0	0	0	5.3786e-05	0.00041918
95	0.0286184	6.635	6.723	0	0	0	0	0	0	0	0	0	0	0	0	0	0	0	0	0	0	0	0	0	0	0	0	0	0	0	0.000225843	0.000201857	0
56	0.0286184	10.423	10.52	0	0	0	0	0	0	0	0	0	0	0	0	0	0	0	0	0	0	0	0	0	0	0	0	0	0	0	0.000205761	0	0.000193976
134	0.0286184	10.466	10.488	0	0	0	0	0	0	0	0	0	0	0	0	0	0	0	0	0	0	0	0	0	0	0	0	0	0	0	0.000195918	0	0.000145019
207	0.0286184	34.7	34.704	0	0	0	0	0	0	0	0	0	0	0	0	0	0	0	0	0	0	0	0	0	0	0	0	0	0	0	0.000153269	0	0.000152552
96	0.0286184	4.737	4.771	0	0	0	0	0	0	0	0	0	0	0	0	0	0	0	0	0	0	0	0	0	0	0	0	0	0	0	0	0.000231079	5.639e-05
60	0.0286184	9.429	9.526	0	0	0	0	0	0	0	0	0	0	0	0	0	0	0	0	0	0	0	0	0	0	0	0	0	0	0	0.00010597	0	0.000165169
69	0.0286184	4.632	4.661	0	0	0	0	0	0	0	0	0	0	0	0	0	0	0	0	0	0	0	0	0	0	0	0	0	0	0	0	0.000116287	0.000140263
50	0.0286184	6.717	6.807	0	0	0	0	0	0	0	0	0	0	0	0	0	0	0	0	0	0	0	0	0	0	0	0	0	0	0	0	0.00021676	3.29369e-05
63	0.0286184	21.659	21.713	0	0	0	0	0	0	0	0	0	0	0	0	0	0	0	0	0	0	0	0	0	0	0	0	0	0	0	0.000163016	8.12721e-05	0
87	0.0286184	8.682	8.683	0	0	0	0	0	0	0	0	0	0	0	0	0	0	0	0	0	0	0	0	0	0	0	0	0	0	0	4.98316e-05	0	0.000190501
53	0.0286184	10.466	10.52	0	0	0	0	0	0	0	0	0	0	0	0	0	0	0	0	0	0	0	0	0	0	0	0	0	0	0	0.000141229	0	8.40724e-05
132	0.0286184	10.52	10.602	0	0	0	0	0	0	0	0	0	0	0	0	0	0	0	0	0	0	0	0	0	0	0	0	0	0	0	0.000140194	0	7.38197e-05
59	0.0286184	16.302	16.304	0	0	0	0	0	0	0	0	0	0	0	0	0	0	0	0	0	0	0	0	0	0	0	0	0	0	0	0	8.96605e-05	0.00012084
152	0.0286184	10.466	10.488	0	0	0	0	0	0	0	0	0	0	0	0	0	0	0	0	0	0	0	0	0	0	0	0	0	0	0	0.000108454	0	9.33853e-05
69	0.0286184	23.242	23.245	0	0	0	0	0	0	0	0	0	0	0	0	0	0	0	0	0	0	0	0	0	0	0	0	0	0	0	0	6.86549e-05	0.000132915
57	0.0286184	16.432	16.475	0	0	0	0	0	0	0	0	0	0	0	0	0	0	0	0	0	0	0	0	0	0	0	0	0	0	0	0	8.93683e-05	9.99499e-05
85	0.0286184	10.466	10.52	0	0	0	0	0	0	0	0	0	0	0	0	0	0	0	0	0	0	0	0	0	0	0	0	0	0	0	0.000112659	0	7.55142e-05
52	0.0286184	6.783	6.87	0	0	0	0	0	0	0	0	0	0	0	0	0	0	0	0	0	0	0	0	0	0	0	0	0	0	0	0	7.39493e-05	0.000112766
131	0.0286184	37.354	37.354	0	0	0	0	0	0	0	0	0	0	0	0	0	0	0	0	0	0	0	0	0	0	0	0	0	0	0	0	8.789e-05	9.6333e-05
93	0.0286184	20.139	20.156	0	0	0	0	0	0	0	0	0	0	0	0	0	0	0	0	0	0	0	0	0	0	0	0	0	0	0	0	5.47142e-05	0.0001288
105	0.0286184	37.354	37.354	0	0	0	0	0	0	0	0	0	0	0	0	0	0	0	0	0	0	0	0	0	0	0	0	0	0	0	0	8.5346e-05	9.25309e-05
73	0.0286184	12.029	12.032	0	0	0	0	0	0	0	0	0	0	0	0	0	0	0	0	0	0	0	0	0	0	0	0	0	0	0	0	5.68973e-05	0.000111712
129	0.0286184	14.105	14.111	0	0	0	0	0	0	0	0	0	0	0	0	0	0	0	0	0	0	0	0	0	0	0	0	0	0	0	9.03467e-05	0	7.78781e-05
77	0.0286184	10.466	10.488	0	0	0	0	0	0	0	0	0	0	0	0	0	0	0	0	0	0	0	0	0	0	0	0	0	0	0	0.000127613	0	4.02847e-05
73	0.0286184	11.54	11.543	0	0	0	0	0	0	0	0	0	0	0	0	0	0	0	0	0	0	0	0	0	0	0	0	0	0	0	0	6.56812e-05	9.94658e-05
124	0.0286184	18.25	18.26	0	0	0	0	0	0	0	0	0	0	0	0	0	0	0	0	0	0	0	0	0	0	0	0	0	0	0	0	7.79545e-05	8.6721e-05
112	0.0286184	20.153	20.156	0	0	0	0	0	0	0	0	0	0	0	0	0	0	0	0	0	0	0	0	0	0	0	0	0	0	0	0	6.94972e-05	9.45103e-05
128	0.0286184	18.517	18.539	0	0	0	0	0	0	0	0	0	0	0	0	0	0	0	0	0	0	0	0	0	0	0	0	0	0	0	7.19366e-05	8.88698e-05	0
88	0.0286184	3.149	3.207	0	0	0	0	0	0	0	0	0	0	0	0	0	0	0	0	0	0	0	0	0	0	0	0	0	0	0	0	5.57456e-05	0.000104592
54	0.0286184	30.901	30.905	0	0	0	0	0	0	0	0	0	0	0	0	0	0	0	0	0	0	0	0	0	0	0	0	0	0	0	0	8.97637e-05	6.88784e-05
77	0.0286184	16.07	16.076	0	0	0	0	0	0	0	0	0	0	0	0	0	0	0	0	0	0	0	0	0	0	0	0	0	0	0	7.7845e-05	0	8.00568e-05
69	0.0286184	22.92	22.945	0	0	0	0	0	0	0	0	0	0	0	0	0	0	0	0	0	0	0	0	0	0	0	0	0	0	0	0	5.48689e-05	0.000102955
97	0.0286184	12.029	12.032	0	0	0	0	0	0	0	0	0	0	0	0	0	0	0	0	0	0	0	0	0	0	0	0	0	0	0	0	5.48346e-05	0.000100648
133	0.0286184	37.354	37.354	0	0	0	0	0	0	0	0	0	0	0	0	0	0	0	0	0	0	0	0	0	0	0	0	0	0	0	0	6.89644e-05	8.50265e-05
146	0.0286184	37.354	37.354	0	0	0	0	0	0	0	0	0	0	0	0	0	0	0	0	0	0	0	0	0	0	0	0	0	0	0	0	7.33993e-05	7.83337e-05
106	0.0286184	15.689	15.713	0	0	0	0	0	0	0	0	0	0	0	0	0	0	0	0	0	0	0	0	0	0	0	0	0	0	0	0	5.95101e-05	9.22176e-05
68	0.0286184	10.466	10.488	0	0	0	0	0	0	0	0	0	0	0	0	0	0	0	0	0	0	0	0	0	0	0	0	0	0	0	9.89785e-05	0	5.1164e-05
72	0.0286184	8.103	8.119	0	0	0	0	0	0	0	0	0	0	0	0	0	0	0	0	0	0	0	0	0	0	0	0	0	0	0	0	7.48604e-05	7.4845e-05
50	0.0286184	20.063	20.093	0	0	0	0	0	0	0	0	0	0	0	0	0	0	0	0	0	0	0	0	0	0	0	0	0	0	0	0	0.000115015	3.39195e-05
55	0.0286184	23.509	23.511	0	0	0	0	0	0	0	0	0	0	0	0	0	0	0	0	0	0	0	0	0	0	0	0	0	0	0	6.83214e-05	0	8.06121e-05
74	0.0286184	5.058	5.072	0	0	0	0	0	0	0	0	0	0	0	0	0	0	0	0	0	0	0	0	0	0	0	0	0	0	0	8.69068e-05	0	6.13598e-05
127	0.0286184	14.87	14.877	0	0	0	0	0	0	0	0	0	0	0	0	0	0	0	0	0	0	0	0	0	0	0	0	0	0	0	8.28138e-05	6.51311e-05	0
62	0.0286184	28.017	28.05	0	0	0	0	0	0	0	0	0	0	0	0	0	0	0	0	0	0	0	0	0	0	0	0	0	0	0	5.40042e-05	0	9.37271e-05
99	0.0286184	1.692	1.693	0	0	0	0	0	0	0	0	0	0	0	0	0	0	0	0	0	0	0	0	0	0	0	0	0	0	0	0	0.000125294	2.23709e-05
207	0.0286184	18.763	18.763	0	0	0	0	0	0	0	0	0	0	0	0	0	0	0	0	0	0	0	0	0	0	0	0	0	0	0	0	5.89085e-05	8.82589e-05
57	0.0286184	21.689	21.704	0	0	0	0	0	0	0	0	0	0	0	0	0	0	0	0	0	0	0	0	0	0	0	0	0	0	0	0	6.35497e-05	8.31753e-05
86	0.0286184	11.806	11.808	0	0	0	0	0	0	0	0	0	0	0	0	0	0	0	0	0	0	0	0	0	0	0	0	0	0	0	0	6.59906e-05	7.98289e-05
55	0.0286184	20.637	20.641	0	0	0	0	0	0	0	0	0	0	0	0	0	0	0	0	0	0	0	0	0	0	0	0	0	0	0	0	6.37559e-05	8.01707e-05
70	0.0286184	20.354	20.362	0	0	0	0	0	0	0	0	0	0	0	0	0	0	0	0	0	0	0	0	0	0	0	0	0	0	0	5.39405e-05	0	8.90279e-05
69	0.0286184	13.434	13.453	0	0	0	0	0	0	0	0	0	0	0	0	0	0	0	0	0	0	0	0	0	0	0	0	0	0	0	0	3.73872e-05	0.000103439
53	0.0286184	16.07	16.076	0	0	0	0	0	0	0	0	0	0	0	0	0	0	0	0	0	0	0	0	0	0	0	0	0	0	0	7.50262e-05	0	6.57172e-05
86	0.0286184	20.077	20.093	0	0	0	0	0	0	0	0	0	0	0	0	0	0	0	0	0	0	0	0	0	0	0	0	0	0	0	7.23028e-05	6.76751e-05	0
82	0.0286184	30.901	30.905	0	0	0	0	0	0	0	0	0	0	0	0	0	0	0	0	0	0	0	0	0	0	0	0	0	0	0	0	7.64934e-05	6.25132e-05
61	0.0286184	14.476	14.504	0	0	0	0	0	0	0	0	0	0	0	0	0	0	0	0	0	0	0	0	0	0	0	0	0	0	0	4.68376e-05	0	9.18616e-05
153	0.0286184	10.466	10.488	0	0	0	0	0	0	0	0	0	0	0	0	0	0	0	0	0	0	0	0	0	0	0	0	0	0	0	8.58557e-05	0	5.22889e-05
207	0.0286184	32.877	32.879	0	0	0	0	0	0	0	0	0	0	0	0	0	0	0	0	0	0	0	0	0	0	0	0	0	0	0	6.95636e-05	0	6.82804e-05
192	0.0286184	19.368	19.37	0	0	0	0	0	0	0	0	0	0	0	0	0	0	0	0	0	0	0	0	0	0	0	0	0	0	0	6.85922e-05	0	6.90493e-05
83	0.0286184	30.901	30.905	0	0	0	0	0	0	0	0	0	0	0	0	0	0	0	0	0	0	0	0	0	0	0	0	0	0	0	0	8.01375e-05	5.71732e-05
110	0.0286184	30.901	30.905	0	0	0	0	0	0	0	0	0	0	0	0	0	0	0	0	0	0	0	0	0	0	0	0	0	0	0	0	7.88655e-05	5.82555e-05
77	0.0286184	18.517	18.539	0	0	0	0	0	0	0	0	0	0	0	0	0	0	0	0	0	0	0	0	0	0	0	0	0	0	0	5.60267e-05	7.86421e-05	0
129	0.0286184	37.354	37.354	0	0	0	0	0	0	0	0	0	0	0	0	0	0	0	0	0	0	0	0	0	0	0	0	0	0	0	0	6.32746e-05	7.11711e-05
71	0.0286184	24.692	24.692	0	0	0	0	0	0	0	0	0	0	0	0	0	0	0	0	0	0	0	0	0	0	0	0	0	0	0	0	7.79029e-05	5.61622e-05
121	0.0286184	20.637	20.641	0	0	0	0	0	0	0	0	0	0	0	0	0	0	0	0	0	0	0	0	0	0	0	0	0	0	0	0	5.9957e-05	7.36773e-05
77	0.0286184	37.354	37.354	0	0	0	0	0	0	0	0	0	0	0	0	0	0	0	0	0	0	0	0	0	0	0	0	0	0	0	0	6.41857e-05	6.86933e-05
85	0.0286184	17.728	17.73	0	0	0	0	0	0	0	0	0	0	0	0	0	0	0	0	0	0	0	0	0	0	0	0	0	0	0	0	5.53159e-05	7.74936e-05
113	0.0286184	14.322	14.325	0	0	0	0	0	0	0	0	0	0	0	0	0	0	0	0	0	0	0	0	0	0	0	0	0	0	0	5.51668e-05	0	7.75078e-05
58	0.0286184	5.424	5.433	0	0	0	0	0	0	0	0	0	0	0	0	0	0	0	0	0	0	0	0	0	0	0	0	0	0	0	0	8.29051e-05	4.8373e-05
127	0.0286184	37.354	37.354	0	0	0	0	0	0	0	0	0	0	0	0	0	0	0	0	0	0	0	0	0	0	0	0	0	0	0	0	6.51655e-05	6.53897e-05
125	0.0286184	30.901	30.905	0	0	0	0	0	0	0	0	0	0	0	0	0	0	0	0	0	0	0	0	0	0	0	0	0	0	0	0	7.33133e-05	5.61764e-05
83	0.0286184	2.561	2.562	0	0	0	0	0	0	0	0	0	0	0	0	0	0	0	0	0	0	0	0	0	0	0	0	0	0	0	5.37812e-05	7.52385e-05	0
207	0.0286184	19.459	19.512	0	0	0	0	0	0	0	0	0	0	0	0	0	0	0	0	0	0	0	0	0	0	0	0	0	0	0	6.72225e-05	0	6.16446e-05
109	0.0286184	12.483	12.497	0	0	0	0	0	0	0	0	0	0	0	0	0	0	0	0	0	0	0	0	0	0	0	0	0	0	0	0	6.3584e-05	6.44641e-05
98	0.0286184	9.746	9.795	0	0	0	0	0	0	0	0	0	0	0	0	0	0	0	0	0	0	0	0	0	0	0	0	0	0	0	4.70287e-05	7.98969e-05	0
91	0.0286184	30.901	30.905	0	0	0	0	0	0	0	0	0	0	0	0	0	0	0	0	0	0	0	0	0	0	0	0	0	0	0	0	7.08896e-05	5.53363e-05
130	0.0286184	21.449	21.455	0	0	0	0	0	0	0	0	0	0	0	0	0	0	0	0	0	0	0	0	0	0	0	0	0	0	0	6.14574e-05	6.31715e-05	0
65	0.0286184	7.114	7.118	0	0	0	0	0	0	0	0	0	0	0	0	0	0	0	0	0	0	0	0	0	0	0	0	0	0	0	6.1123e-05	0	6.34673e-05
55	0.0286184	1.664	1.669	0	0	0	0	0	0	0	0	0	0	0	0	0	0	0	0	0	0	0	0	0	0	0	0	0	0	0	4.53884e-05	7.84014e-05	0
54	0.0286184	14.105	14.111	0	0	0	0	0	0	0	0	0	0	0	0	0	0	0	0	0	0	0	0	0	0	0	0	0	0	0	6.29385e-05	0	6.00782e-05
54	0.0286184	21.449	21.455	0	0	0	0	0	0	0	0	0	0	0	0	0	0	0	0	0	0	0	0	0	0	0	0	0	0	0	6.08045e-05	6.1315e-05	0
127	0.0286184	18.517	18.539	0	0	0	0	0	0	0	0	0	0	0	0	0	0	0	0	0	0	0	0	0	0	0	0	0	0	0	5.66797e-05	6.44951e-05	0
83	0.0286184	4.559	4.661	0	0	0	0	0	0	0	0	0	0	0	0	0	0	0	0	0	0	0	0	0	0	0	0	0	0	0	0	6.84143e-05	5.23744e-05
98	0.0286184	14.111	14.13	0	0	0	0	0	0	0	0	0	0	0	0	0	0	0	0	0	0	0	0	0	0	0	0	0	0	0	8.63653e-05	0	3.41188e-05
191	0.0286184	19.368	19.391	0	0	0	0	0	0	0	0	0	0	0	0	0	0	0	0	0	0	0	0	0	0	0	0	0	0	0	4.07858e-05	0	7.84904e-05
72	0.0286184	12.401	12.402	0	0	0	0	0	0	0	0	0	0	0	0	0	0	0	0	0	0	0	0	0	0	0	0	0	0	0	6.48815e-05	0	5.41401e-05
80	0.0286184	16.07	16.076	0	0	0	0	0	0	0	0	0	0	0	0	0	0	0	0	0	0	0	0	0	0	0	0	0	0	0	6.3273e-05	0	5.52793e-05
71	0.0286184	20.008	20.009	0	0	0	0	0	0	0	0	0	0	0	0	0	0	0	0	0	0	0	0	0	0	0	0	0	0	0	0	4.96433e-05	6.86079e-05
96	0.0286184	3.747	3.754	0	0	0	0	0	0	0	0	0	0	0	0	0	0	0	0	0	0	0	0	0	0	0	0	0	0	0	0	6.50451e-05	5.28158e-05
95	0.0286184	15.103	15.121	0	0	0	0	0	0	0	0	0	0	0	0	0	0	0	0	0	0	0	0	0	0	0	0	0	0	0	0	6.04555e-05	5.69596e-05
53	0.0286184	9.91	9.921	0	0	0	0	0	0	0	0	0	0	0	0	0	0	0	0	0	0	0	0	0	0	0	0	0	0	0	5.76512e-05	5.97336e-05	0
67	0.0286184	30.901	30.905	0	0	0	0	0	0	0	0	0	0	0	0	0	0	0	0	0	0	0	0	0	0	0	0	0	0	0	0	6.53374e-05	5.18048e-05
120	0.0286184	12.216	12.218	0	0	0	0	0	0	0	0	0	0	0	0	0	0	0	0	0	0	0	0	0	0	0	0	0	0	0	0	5.63129e-05	5.97079e-05
95	0.0286184	22.115	22.126	0	0	0	0	0	0	0	0	0	0	0	0	0	0	0	0	0	0	0	0	0	0	0	0	0	0	0	5.53579e-05	0	5.99358e-05
59	0.0286184	5.424	5.433	0	0	0	0	0	0	0	0	0	0	0	0	0	0	0	0	0	0	0	0	0	0	0	0	0	0	0	0	5.65879e-05	5.81558e-05
85	0.0286184	11.297	11.318	0	0	0	0	0	0	0	0	0	0	0	0	0	0	0	0	0	0	0	0	0	0	0	0	0	0	0	0	4.93855e-05	6.51618e-05
83	0.0286184	3.841	3.845	0	0	0	0	0	0	0	0	0	0	0	0	0	0	0	0	0	0	0	0	0	0	0	0	0	0	0	0	6.7211e-05	4.6949e-05
219	0.0286184	28.017	28.017	0	0	0	0	0	0	0	0	0	0	0	0	0	0	0	0	0	0	0	0	0	0	0	0	0	0	0	5.32397e-05	0	5.95371e-05
58	0.0286184	4.661	4.661	0	0	0	0	0	0	0	0	0	0	0	0	0	0	0	0	0	0	0	0	0	0	0	0	0	0	0	0	6.28621e-05	4.974e-05
189	0.0286184	37.354	37.354	0	0	0	0	0	0	0	0	0	0	0	0	0	0	0	0	0	0	0	0	0	0	0	0	0	0	0	0	5.35797e-05	5.88535e-05
82	0.0286184	21.239	21.247	0	0	0	0	0	0	0	0	0	0	0	0	0	0	0	0	0	0	0	0	0	0	0	0	0	0	0	5.46412e-05	5.77568e-05	0
85	0.0286184	24.383	24.385	0	0	0	0	0	0	0	0	0	0	0	0	0	0	0	0	0	0	0	0	0	0	0	0	0	0	0	0	5.84959e-05	5.38696e-05
88	0.0286184	7.611	7.613	0	0	0	0	0	0	0	0	0	0	0	0	0	0	0	0	0	0	0	0	0	0	0	0	0	0	0	5.51031e-05	0	5.59771e-05
67	0.0286184	5.046	5.058	0	0	0	0	0	0	0	0	0	0	0	0	0	0	0	0	0	0	0	0	0	0	0	0	0	0	0	5.88615e-05	0	5.20611e-05
70	0.0286184	16.879	16.924	0	0	0	0	0	0	0	0	0	0	0	0	0	0	0	0	0	0	0	0	0	0	0	0	0	0	0	5.81926e-05	5.23593e-05	0
105	0.0286184	18.517	18.539	0	0	0	0	0	0	0	0	0	0	0	0	0	0	0	0	0	0	0	0	0	0	0	0	0	0	0	5.18383e-05	5.84959e-05	0
143	0.0286184	11.318	11.378	0	0	0	0	0	0	0	0	0	0	0	0	0	0	0	0	0	0	0	0	0	0	0	0	0	0	0	0	6.88612e-05	4.11533e-05
52	0.0286184	14.322	14.325	0	0	0	0	0	0	0	0	0	0	0	0	0	0	0	0	0	0	0	0	0	0	0	0	0	0	0	5.0405e-05	0	5.91526e-05
74	0.0286184	9.91	9.921	0	0	0	0	0	0	0	0	0	0	0	0	0	0	0	0	0	0	0	0	0	0	0	0	0	0	0	5.26983e-05	5.61925e-05	0
84	0.0286184	11.868	11.869	0	0	0	0	0	0	0	0	0	0	0	0	0	0	0	0	0	0	0	0	0	0	0	0	0	0	0	4.99909e-05	0	5.83551e-05
117	0.0286184	11.255	11.257	0	0	0	0	0	0	0	0	0	0	0	0	0	0	0	0	0	0	0	0	0	0	0	0	0	0	0	0	4.62398e-05	6.16873e-05
81	0.0286184	16.07	16.076	0	0	0	0	0	0	0	0	0	0	0	0	0	0	0	0	0	0	0	0	0	0	0	0	0	0	0	5.30805e-05	0	5.47667e-05
110	0.0286184	9.795	9.823	0	0	0	0	0	0	0	0	0	0	0	0	0	0	0	0	0	0	0	0	0	0	0	0	0	0	0	0	6.47014e-05	4.17087e-05
77	0.0286184	22.53	22.536	0	0	0	0	0	0	0	0	0	0	0	0	0	0	0	0	0	0	0	0	0	0	0	0	0	0	0	0	5.04684e-05	5.55214e-05
109	0.0286184	17.94	17.946	0	0	0	0	0	0	0	0	0	0	0	0	0	0	0	0	0	0	0	0	0	0	0	0	0	0	0	0	5.11904e-05	5.43822e-05
83	0.0286184	17.166	17.173	0	0	0	0	0	0	0	0	0	0	0	0	0	0	0	0	0	0	0	0	0	0	0	0	0	0	0	0	5.52643e-05	5.01245e-05
58	0.0286184	21.19	21.191	0	0	0	0	0	0	0	0	0	0	0	0	0	0	0	0	0	0	0	0	0	0	0	0	0	0	0	0	5.59003e-05	4.87005e-05
65	0.0286184	8.396	8.415	0	0	0	0	0	0	0	0	0	0	0	0	0	0	0	0	0	0	0	0	0	0	0	0	0	0	0	5.45297e-05	0	4.95976e-05
92	0.0286184	28.017	28.017	0	0	0	0	0	0	0	0	0	0	0	0	0	0	0	0	0	0	0	0	0	0	0	0	0	0	0	5.43705e-05	0	4.96546e-05
98	0.0286184	6.085	6.092	0	0	0	0	0	0	0	0	0	0	0	0	0	0	0	0	0	0	0	0	0	0	0	0	0	0	0	5.83201e-05	0	4.56247e-05
105	0.0286184	8.126	8.148	0	0	0	0	0	0	0	0	0	0	0	0	0	0	0	0	0	0	0	0	0	0	0	0	0	0	0	0	5.32188e-05	5.06656e-05
68	0.0286184	8.265	8.277	0	0	0	0	0	0	0	0	0	0	0	0	0	0	0	0	0	0	0	0	0	0	0	0	0	0	0	5.5533e-05	0	4.82875e-05
69	0.0286184	18.306	18.312	0	0	0	0	0	0	0	0	0	0	0	0	0	0	0	0	0	0	0	0	0	0	0	0	0	0	0	4.79046e-05	0	5.58632e-05
69	0.0286184	16.07	16.076	0	0	0	0	0	0	0	0	0	0	0	0	0	0	0	0	0	0	0	0	0	0	0	0	0	0	0	5.2332e-05	0	5.11497e-05
55	0.0286184	23.427	23.432	0	0	0	0	0	0	0	0	0	0	0	0	0	0	0	0	0	0	0	0	0	0	0	0	0	0	0	5.38768e-05	0	4.9384e-05
56	0.0286184	23.427	23.432	0	0	0	0	0	0	0	0	0	0	0	0	0	0	0	0	0	0	0	0	0	0	0	0	0	0	0	5.24594e-05	0	5.00675e-05
105	0.0286184	16.193	16.199	0	0	0	0	0	0	0	0	0	0	0	0	0	0	0	0	0	0	0	0	0	0	0	0	0	0	0	5.11216e-05	0	5.13918e-05
84	0.0286184	17.439	17.442	0	0	0	0	0	0	0	0	0	0	0	0	0	0	0	0	0	0	0	0	0	0	0	0	0	0	0	5.05961e-05	5.17405e-05	0
84	0.0286184	14.572	14.574	0	0	0	0	0	0	0	0	0	0	0	0	0	0	0	0	0	0	0	0	0	0	0	0	0	0	0	5.92597e-05	0	4.29618e-05
132	0.0286184	26.095	26.102	0	0	0	0	0	0	0	0	0	0	0	0	0	0	0	0	0	0	0	0	0	0	0	0	0	0	0	4.73472e-05	5.45939e-05	0
95	0.0286184	9.746	9.746	0	0	0	0	0	0	0	0	0	0	0	0	0	0	0	0	0	0	0	0	0	0	0	0	0	0	0	5.38927e-05	0	4.73762e-05
114	0.0286184	28.017	28.017	0	0	0	0	0	0	0	0	0	0	0	0	0	0	0	0	0	0	0	0	0	0	0	0	0	0	0	5.2969e-05	0	4.81594e-05
117	0.0286184	21.658	21.685	0	0	0	0	0	0	0	0	0	0	0	0	0	0	0	0	0	0	0	0	0	0	0	0	0	0	0	6.2397e-05	0	3.86898e-05
69	0.0286184	16.446	16.455	0	0	0	0	0	0	0	0	0	0	0	0	0	0	0	0	0	0	0	0	0	0	0	0	0	0	0	0	5.4508e-05	4.6536e-05
67	0.0286184	14.111	14.13	0	0	0	0	0	0	0	0	0	0	0	0	0	0	0	0	0	0	0	0	0	0	0	0	0	0	0	4.31269e-05	0	5.78283e-05
100	0.0286184	2.887	2.919	0	0	0	0	0	0	0	0	0	0	0	0	0	0	0	0	0	0	0	0	0	0	0	0	0	0	0	0	5.6502e-05	4.39444e-05
83	0.0286184	3.515	3.52	0	0	0	0	0	0	0	0	0	0	0	0	0	0	0	0	0	0	0	0	0	0	0	0	0	0	0	4.90035e-05	0	5.13349e-05
77	0.0286184	7.772	7.778	0	0	0	0	0	0	0	0	0	0	0	0	0	0	0	0	0	0	0	0	0	0	0	0	0	0	0	0	5.01934e-05	4.98397e-05
70	0.0286184	23.427	23.432	0	0	0	0	0	0	0	0	0	0	0	0	0	0	0	0	0	0	0	0	0	0	0	0	0	0	0	5.33353e-05	0	4.63367e-05
58	0.0286184	8.089	8.103	0	0	0	0	0	0	0	0	0	0	0	0	0	0	0	0	0	0	0	0	0	0	0	0	0	0	0	0	5.02965e-05	4.90422e-05
68	0.0286184	30.901	30.905	0	0	0	0	0	0	0	0	0	0	0	0	0	0	0	0	0	0	0	0	0	0	0	0	0	0	0	0	4.77353e-05	5.14203e-05
70	0.0286184	14.407	14.413	0	0	0	0	0	0	0	0	0	0	0	0	0	0	0	0	0	0	0	0	0	0	0	0	0	0	0	4.69491e-05	0	5.20469e-05
55	0.0286184	22.784	22.785	0	0	0	0	0	0	0	0	0	0	0	0	0	0	0	0	0	0	0	0	0	0	0	0	0	0	0	0	5.21358e-05	4.68351e-05
55	0.0286184	19.852	19.859	0	0	0	0	0	0	0	0	0	0	0	0	0	0	0	0	0	0	0	0	0	0	0	0	0	0	0	5.00546e-05	0	4.88714e-05
65	0.0286184	4.65	4.661	0	0	0	0	0	0	0	0	0	0	0	0	0	0	0	0	0	0	0	0	0	0	0	0	0	0	0	4.77931e-05	5.0795e-05	0
92	0.0286184	7.755	7.778	0	0	0	0	0	0	0	0	0	0	0	0	0	0	0	0	0	0	0	0	0	0	0	0	0	0	0	0	5.03309e-05	4.82448e-05
50	0.0286184	15.653	15.655	0	0	0	0	0	0	0	0	0	0	0	0	0	0	0	0	0	0	0	0	0	0	0	0	0	0	0	4.2888e-05	5.54706e-05	0
107	0.0286184	17.794	17.802	0	0	0	0	0	0	0	0	0	0	0	0	0	0	0	0	0	0	0	0	0	0	0	0	0	0	0	0	5.1878e-05	4.5112e-05
97	0.0286184	16.193	16.199	0	0	0	0	0	0	0	0	0	0	0	0	0	0	0	0	0	0	0	0	0	0	0	0	0	0	0	4.99113e-05	0	4.68635e-05
64	0.0286184	15.65	15.653	0	0	0	0	0	0	0	0	0	0	0	0	0	0	0	0	0	0	0	0	0	0	0	0	0	0	0	5.61382e-05	0	4.05695e-05
108	0.0286184	17.698	17.698	0	0	0	0	0	0	0	0	0	0	0	0	0	0	0	0	0	0	0	0	0	0	0	0	0	0	0	4.98794e-05	0	4.63509e-05
83	0.0286184	16.193	16.199	0	0	0	0	0	0	0	0	0	0	0	0	0	0	0	0	0	0	0	0	0	0	0	0	0	0	0	4.92742e-05	0	4.6949e-05
91	0.0286184	29.994	29.996	0	0	0	0	0	0	0	0	0	0	0	0	0	0	0	0	0	0	0	0	0	0	0	0	0	0	0	0	5.4147e-05	4.17656e-05
95	0.0286184	12.727	12.734	0	0	0	0	0	0	0	0	0	0	0	0	0	0	0	0	0	0	0	0	0	0	0	0	0	0	0	0	4.54319e-05	5.0452e-05
61	0.0286184	30.901	30.905	0	0	0	0	0	0	0	0	0	0	0	0	0	0	0	0	0	0	0	0	0	0	0	0	0	0	0	0	4.27675e-05	5.26022e-05
85	0.0286184	3.841	3.852	0	0	0	0	0	0	0	0	0	0	0	0	0	0	0	0	0	0	0	0	0	0	0	0	0	0	0	4.9099e-05	0	4.60803e-05
85	0.0286184	5.329	5.35	0	0	0	0	0	0	0	0	0	0	0	0	0	0	0	0	0	0	0	0	0	0	0	0	0	0	0	5.07872e-05	0	4.39728e-05
111	0.0286184	17.698	17.699	0	0	0	0	0	0	0	0	0	0	0	0	0	0	0	0	0	0	0	0	0	0	0	0	0	0	0	0	4.95574e-05	4.40725e-05
60	0.0286184	6.99	6.996	0	0	0	0	0	0	0	0	0	0	0	0	0	0	0	0	0	0	0	0	0	0	0	0	0	0	0	4.66943e-05	0	4.59522e-05
57	0.0286184	13.072	13.082	0	0	0	0	0	0	0	0	0	0	0	0	0	0	0	0	0	0	0	0	0	0	0	0	0	0	0	5.04368e-05	0	4.14666e-05
143	0.0286184	26.097	26.102	0	0	0	0	0	0	0	0	0	0	0	0	0	0	0	0	0	0	0	0	0	0	0	0	0	0	0	6.02471e-05	0	2.96902e-05
60	0.0286184	3.747	3.802	0	0	0	0	0	0	0	0	0	0	0	0	0	0	0	0	0	0	0	0	0	0	0	0	0	0	0	5.01183e-05	0	3.75934e-05
100	0.0286184	24.383	24.385	0	0	0	0	0	0	0	0	0	0	0	0	0	0	0	0	0	0	0	0	0	0	0	0	0	0	0	0	4.16158e-05	4.57955e-05
55	0.0286184	16.446	16.455	0	0	0	0	0	0	0	0	0	0	0	0	0	0	0	0	0	0	0	0	0	0	0	0	0	0	0	0	5.41298e-05	3.09433e-05
50	0.0286184	28.017	28.02	0	0	0	0	0	0	0	0	0	0	0	0	0	0	0	0	0	0	0	0	0	0	0	0	0	0	0	0	4.32316e-05	4.09113e-05
108	0.0286184	16.169	16.193	0	0	0	0	0	0	0	0	0	0	0	0	0	0	0	0	0	0	0	0	0	0	0	0	0	0	0	4.74587e-05	0	3.3179e-05
50	0.0286184	13.692	13.717	0	0	0	0	0	0	0	0	0	0	0	0	0	0	0	0	0	0	0	0	0	0	0	0	0	0	0	3.63903e-05	4.35067e-05	0
72	0.0286184	9.896	9.91	0	0	0	0	0	0	0	0	0	0	0	0	0	0	0	0	0	0	0	0	0	0	0	0	0	0	0	3.21222e-05	4.62054e-05	0
80	0.0286184	18.26	18.281	0	0	0	0	0	0	0	0	0	0	0	0	0	0	0	0	0	0	0	0	0	0	0	0	0	0	0	3.00996e-05	0	4.77891e-05
58	0.0286184	16.939	16.941	0	0	0	0	0	0	0	0	0	0	0	0	0	0	0	0	0	0	0	0	0	0	0	0	0	0	0	3.97347e-05	0	3.72516e-05
129	0.0286184	30.901	30.905	0	0	0	0	0	0	0	0	0	0	0	0	0	0	0	0	0	0	0	0	0	0	0	0	0	0	0	0	4.34379e-05	3.19259e-05
81	0.0286184	3.75	3.799	0	0	0	0	0	0	0	0	0	0	0	0	0	0	0	0	0	0	0	0	0	0	0	0	0	0	0	4.29039e-05	2.35153e-05	0
60	0.0286184	16.939	16.972	0	0	0	0	0	0	0	0	0	0	0	0	0	0	0	0	0	0	0	0	0	0	0	0	0	0	0	0	2.6936e-05	3.85901e-05
56	0.0286184	4.642	4.65	0	0	0	0	0	0	0	0	0	0	0	0	0	0	0	0	0	0	0	0	0	0	0	0	0	0	0	3.67566e-05	2.28964e-05	0
50	0.0286184	9.746	9.786	0	0	0	0	0	0	0	0	0	0	0	0	0	0	0	0	0	0	0	0	0	0	0	0	0	0	0	2.1882e-05	0	3.51014e-05
98	0.0286184	7.101	7.118	0	0	0	0	0	0	0	0	0	0	0	0	0	0	0	0	0	0	0	0	0	0	0	0	0	0	0	3.62788e-05	2.05587e-05	0
150	0.0286184	10.517	10.552	0	0	0	0	0	0	0	0	0	0	0	0	0	0	0	0	0	0	0	0	0	0	0	0	0	0	0	2.14679e-05	0	1.77572e-05
57	0.028691	1.559	1.656	0	0	0	0	0	0.0004582	0	0.000569462	0	0	0.00184799	0.00189371	0.00182498	0.00198595	0.0010117	0	0.00215033	0.00263313	0.00251694	0.00245622	0.00567328	0	0.000728828	0	0	0	0	0.000288957	0.000333975	0.000239088
58	0.0289978	1.76	1.882	0	0	0	0	0	0	0	0.000517621	0	0	0	0	0.000887745	0.000596201	0.000411649	0	0.00136118	0	0	0.00113712	0.00204528	0	0.000690146	0	0.00234694	0.000965482	0.00387468	0	0	0
56	0.0296237	2.135	2.176	0.00111377	0	0.00139565	0.000874525	0.000886718	0.000867223	0.000721197	0.000641023	0.000578121	0	0	0.00101036	0.000951329	0.00081407	0.000862961	0	0	0	0.000719502	0	0	0	0	0	0	0	0	0.000130432	0.000109635	0.000118704
59	0.0302659	15.373	15.388	0	0	0	0.000503946	0.000760314	0.000623316	0	0.000559444	0.000502297	0	0	0	0	0.000311369	0	0	0	0	0	0.00120783	0	0	0	0	0	0	0	0	0	0
68	0.0334149	3.472	3.515	0.00110375	0.00146764	0.00153859	0.000647442	0.000706265	0.000657424	0.000695474	0.000696999	0.00061458	0	0.00078648	0	0.00032949	0.000354801	0.000342624	0	0.00100837	0.000913267	0.000714882	0.00151293	0.00072098	0.000853812	0.000693317	0	0	0	0	9.8214e-05	0.000103584	9.04946e-05
55	0.0338443	2.135	2.268	0.00108467	0	0.00134175	0.000849848	0.00155434	0.00141743	0.000705716	0.00111125	0.00103074	0	0.000778546	0.000985439	0.000955802	0.000853699	0.000909844	0	0.000872693	0	0.00162779	0.00137904	0.000684063	0	0	0	0	0	0	0.000148746	0.000121289	0.000139793
106	0.0340312	16.397	16.513	0.00079241	0.00162121	0.00267677	0.000744294	0.000886863	0.000594629	0.00154767	0.00148353	0.00129496	0.00164474	0.000992223	0.00110478	0.00103319	0.000717475	0.00118344	0.00190106	0.000907944	0.00148199	0.00118333	0.00132449	0.000670578	0.00243472	0.00221502	0.00234119	0.00225435	0.0006229	0.00224919	0	0	0
73	0.0357413	12.465	12.575	0	0.00161621	0.00109968	0	0.000299302	0	0.000661415	0	0	0	0.000603214	0.000550954	0.00131125	0.00156313	0.00213372	0.00159622	0.000992073	0.000756398	0.000875945	0.000975597	0.000621017	0	0	0	0.00156782	0.000684899	0	0.000154926	0.00027034	0.000281452
192	0.0371857	21.142	21.157	0	0	0	0	0	0	0	0	0	0	0	0	0.000250253	0.000413979	0	0	0.00102703	0.000693079	0	0	0	0	0	0	0	0	0	0	0	0
86	0.0371857	12.497	12.523	0	0	0	0	0	0	0	0	0	0	0	0	0.000196683	0	0.000298243	0	0	0	0	0	0	0	0	0	0	0	0	0	6.19167e-05	8.3275e-05
61	0.0373411	1.763	1.779	0	0	0	0	0	0	0	0	0	0	0	0	0.000697091	0.000425567	0.000296992	0	0	0	0	0	0.00236202	0	0	0	0	0	0.00255642	0	0	0
210	0.0373411	6.322	6.333	0	0	0	0	0	0	0	0	0	0	0	0	0	0	0	0	0.000937567	0	0	0	0	0.000826391	0.000672179	0.000686004	0.0016192	0	0	0	0	0
68	0.0373411	20.093	20.103	0	0	0	0.000504802	0	0	0	0	0	0	0	0	0	0	0	0	0	0	0	0	0	0	0	0	0.00192012	0	0	0.000312479	0.000322097	0.000151755
83	0.0373411	12.475	12.513	0	0	0	0.00047984	0	0	0	0	0	0	0	0	0	0	0	0	0	0	0	0	0	0	0	0	0	0.000808366	0	0.00038311	0.000410383	0.000335264
71	0.0373411	19.836	19.859	0	0	0	0	0	0	0	0	0	0	0	0	0	0.000261214	0	0	0	0	0	0	0.000907083	0	0	0	0	0	0	0.000148715	7.80576e-05	8.79741e-05
282	0.0373411	27.374	27.382	0	0	0	0	0	0	0	0	0	0	0	0	0	0.000346133	0	0	0	0.000855939	0	0	0	0	0	0	0	0	0	5.45138e-05	6.50795e-05	5.86115e-05
73	0.0373411	1.766	1.818	0	0	0	0	0	0.000379013	0	0	0	0	0	0	0	0.00024936	0	0	0	0	0	0	0	0	0	0	0	0	0	6.00082e-05	7.31242e-05	6.64719e-05
56	0.0392341	44.527	44.55	0.00193043	0.00353705	0	0	0.000646841	0.000672891	0.00158578	0.00685104	0.00230159	0.00123678	0.00148781	0	0	0	0	0.00364994	0.00706034	0.00345427	0.00123944	0.00204703	0.0083957	0.00342275	0.00233825	0.00212193	0	0.00129667	0.0101441	0.000136499	0.000147881	0.000142356
84	0.0405971	44.527	44.55	0.00152566	0.0027337	0	0	0.000520001	0.000533554	0.00126948	0.00572738	0.00188834	0.000912252	0.0011464	0	0	0	0	0.0028673	0.00559756	0.00267819	0.00091269	0.00155564	0.0069824	0.00251294	0.00194277	0.00167231	0	0.000997806	0.00807045	0.000112388	0.000116803	0.000115614
97	0.0413544	44.527	44.551	0.00268728	0.00483712	0	0.000558577	0.000881197	0.000854003	0.0020345	0.0096147	0.0032645	0.00161086	0.00204395	0	0	0	0	0.005079	0.00965531	0.00471265	0.00165794	0.00279039	0.0118319	0.00447515	0.00317932	0.00285449	0	0.00175822	0.0136484	0.00019294	0.000209901	0.000192865
111	0.0429548	44.527	44.55	0.00138599	0.00243807	0	0	0.000431954	0.000460316	0.000975093	0.00507046	0.00165099	0	0.00107843	0	0	0	0	0.00256197	0.0050288	0.00253501	0.000860542	0.00131228	0.00618893	0.00238969	0.00165572	0.00153338	0	0.000898185	0.00716107	0.000104505	0.000112316	0.000111086
85	0.0447936	44.527	44.55	0	0	0	0	0	0	0	0.00243258	0.000889696	0	0	0	0	0	0	0.00146819	0.0025455	0.0014663	0	0	0.00289083	0.00135317	0.000914417	0.000827594	0	0	0.00410799	4.90831e-05	6.09369e-05	4.81309e-05
52	0.0464187	16.397	16.444	0.00108467	0	0.00167093	0.000577406	0	0.000422903	0.00158268	0.00162967	0.00135321	0	0.000801818	0.000531782	0.000695438	0.000707745	0.000894826	0	0.000697621	0.000746415	0.000873084	0	0.000645292	0.00245724	0.00230295	0.0026456	0.00189302	0	0	0	0	0
82	0.0464965	44.527	44.551	0.00178753	0.00326243	0	0	0.000586108	0.000587755	0.00138237	0.00637063	0.00207426	0.00119589	0.00140001	0	0	0	0	0.00346491	0.00647499	0.00315223	0.00106407	0.00190597	0.00770338	0.00287144	0.00205923	0.00189857	0	0.00122381	0.00949419	0.000134668	0.000133373	0.000128643
68	0.0468901	44.527	44.557	0.00134428	0.00236154	0	0	0.000437765	0.000434272	0.00101439	0.00466463	0.00159608	0.000832731	0.00101021	0	0	0	0	0.00247742	0.00455127	0.00230256	0.000820497	0.00127388	0.0055664	0.00230397	0.00149063	0.00140385	0	0.000886262	0.00647576	9.18278e-05	0.000100112	9.74864e-05
71	0.0479548	44.527	44.557	0.00133426	0.00231102	0	0	0.000448807	0.00045516	0.00100701	0.00427788	0.0014883	0.000852611	0.00101153	0	0	0	0	0.00244215	0.00440671	0.00218306	0.000817416	0.00126311	0.00515778	0.00210451	0.0014771	0.00145788	0	0.000960448	0.00648346	8.47886e-05	9.33563e-05	8.61514e-05
70	0.0479895	44.527	44.551	0.00225017	0.0040908	0	0.000471282	0.000748109	0.000735024	0.00165794	0.00794687	0.00276292	0.00145266	0.00175067	0	0	0	0	0.00414127	0.00787408	0.0039805	0.00144253	0.00223583	0.00990476	0.00355669	0.00250714	0.00253705	0	0.00148532	0.0112667	0.000162395	0.000174267	0.000157451
57	0.0492521	44.524	44.581	0	0	0	0	0	0	0	0.00902012	0.00317778	0	0	0	0	0	0	0.00509881	0.0087447	0.00456833	0	0	0.0108501	0.00438885	0.00290242	0.00297003	0	0	0.0136568	0.000174498	0.000191715	0.000179594
58	0.0506656	3.835	3.856	0.000914941	0	0	0.000603509	0.000430791	0.000479881	0	0	0	0	0.000602157	0.000770233	0	0	0	0	0	0	0	0	0	0	0.000675772	0	0	0	0	0.000264956	0.000229514	0.000284115
92	0.0514142	20.475	20.562	0	0	0	0.00106966	0.000548187	0	0.000755733	0.00051603	0.000448843	0.00100549	0	0.00231382	0	0	0	0	0	0	0	0	0	0	0.000757152	0.00173238	0	0	0	4.65032e-05	0	0
96	0.0600426	44.527	44.55	0	0.00151917	0	0	0	0	0.000680945	0.00264583	0.000922524	0	0	0	0	0	0	0.00156143	0.00274398	0.00149283	0	0	0.00313442	0.00137049	0.000994529	0.000896581	0	0	0.00419115	5.5326e-05	5.72411e-05	5.81273e-05
55	0.0632853	1.76	1.802	0	0	0	0	0	0	0	0	0	0	0	0	0.000844287	0.000534988	0.000387293	0	0.00115796	0	0	0	0.00265905	0	0	0	0	0	0.00248481	4.85098e-05	5.26171e-05	5.06229e-05
99	0.0758549	11.774	11.799	0	0	0	0	0	0	0	0.00334998	0.000503169	0	0	0	0	0	0	0	0	0	0	0	0	0.00220121	0.000845508	0	0	0	0	5.47686e-05	0	0
72	0.0758549	11.774	11.799	0	0	0	0	0	0	0	0.00309809	0.000439256	0	0	0	0	0	0	0	0	0	0	0	0	0.00192584	0.000764551	0	0	0	0	5.0819e-05	0	0
264	0.0760246	38.088	38.187	0	0.00271969	0	0.000501236	0.000333445	0	0	0	0	0.000397885	0.0016195	0.000988554	0	0	0.00034763	0	0.00358083	0	0.00102777	0.000963034	0	0.00161006	0.000697121	0.00120581	0.00162541	0.00200674	0.00557793	3.06252e-05	0	0
206	0.0812506	15.1	15.13	0.000538619	0	0	0	0	0	0	0	0	0.000555247	0.000998305	0.000633394	0	0	0.000164814	0.000880721	0	0	0	0.000698496	0	0	0	0	0	0	0	0	0	0
188	0.0948991	30.941	30.977	0	0	0	0	0	0.000168024	0	0	0	0	0	0	0	0	0	0	0	0.000581844	0	0	0.000239877	0	0.000653578	0	0.00112125	0.000562756	0.00188883	0	3.85733e-05	0
55	0.100606	44.524	44.634	0	0.00541438	0	0	0	0	0	0.0113118	0.00360846	0	0	0	0	0	0	0.00567324	0.0120334	0.00556289	0	0	0.013219	0.00494247	0.00353803	0.00328264	0	0	0.0159276	0.000210108	0.000232437	0.000211904
69	0.100606	44.524	44.551	0	0.00521329	0	0	0	0	0	0.0109068	0.00377202	0	0	0	0	0	0	0.00593895	0.0111856	0.00551782	0	0	0.0136659	0.00513788	0.00358749	0.00343074	0	0	0.0157982	0.000215889	0.000236064	0.000221103
130	0.101588	38.108	38.179	0	0	0	0	0	0	0	0	0	0	0	0.000825592	0	0	0	0.00128799	0.000531436	0	0	0	0	0	0	0	0	0	0	0	0	0
56	0.104861	14.105	14.135	0	0	0	0	0	0.000573081	0	0	0	0	0	0	0	0	0	0	0	0	0	0	0	0.000910098	0	0	0	0.000724642	0	0.000332912	0.000239863	0.000365795
50	0.112158	16.384	16.474	0.00106172	0.0011395	0.00110545	0.000495816	0.000395776	0.000632438	0.00174202	0	0.00117469	0	0	0	0.00068591	0.000746755	0	0.00100537	0.000880987	0	0	0	0	0	0.00142975	0.000527769	0.00362627	0.000452007	0	0	0	0
59	0.115835	1.748	1.875	0	0	0	0	0	0	0	0	0	0	0	0	0.0309248	0.0192653	0	0	0	0	0	0	0.0972698	0	0	0	0	0	0	0	0	0
132	0.115835	5.234	5.306	0	0	0	0	0	0	0	0	0	0	0	0	0	0	0	0	0.00429829	0	0	0	0	0	0.00284471	0.00419466	0	0	0	0	0	0
57	0.115835	1.748	1.802	0	0	0	0	0	0	0	0	0	0	0	0	0.00234425	0.0014698	0	0	0	0	0	0	0.00744631	0	0	0	0	0	0	0	0	0
328	0.115835	44.54	44.591	0	0	0	0	0.00167435	0.00120433	0	0	0	0	0	0	0	0	0	0	0	0.00225094	0	0	0	0	0	0	0	0	0	0	0	0
207	0.115835	15.1	15.15	0	0	0	0	0	0	0	0	0	0.0045145	0	0	0	0	0	0	0	0	0	0	0	0	0	0	0	0	0	0	0.000281358	0.000302797
154	0.115835	22.98	23.05	0	0	0	0	0	0	0	0	0	0	0	0	0.00259304	0	0	0	0	0	0	0	0	0	0	0	0	0	0	0	0.000537551	0.000507881
88	0.115835	20.357	20.414	0	0	0	0	0	0	0	0	0	0	0	0	0.000370809	0	0.00026349	0	0	0	0	0	0	0.00121029	0	0	0	0	0	0	0	0
53	0.115835	1.763	1.802	0	0	0	0	0	0	0	0	0	0	0	0	0.000284184	0.000244672	0	0	0	0	0	0	0.00123782	0	0	0	0	0	0	0	0	0
251	0.115835	15.1	15.15	0	0	0	0	0	0.00111285	0	0	0	0	0	0	0	0	0	0	0	0	0	0	0	0	0	0	0	0	0	0	0.000154293	0.000226343
58	0.115835	6.717	6.849	0	0	0	0	0	0	0	0	0	0	0	0	0	0	0	0.00061549	0	0	0	0	0	0	0	0	0	0	0	0	0.000238195	8.2919e-05
146	0.115835	23.014	23.025	0	0	0	0	0	0	0	0	0	0	0	0	0	0	0	0	0	0	0	0	0	0	0	0	0	0.000639857	0	0	3.71466e-05	2.63581e-05
285	0.115835	15.118	15.121	0	0	0	0	0	0.000467719	0	0	0	0	0	0	0	0	0	0	0	0	0	0	0	0	0	0	0	0	0	0	5.61925e-05	7.60981e-05
208	0.115835	15.118	15.121	0	0	0	0	0	0.000399372	0	0	0	0	0	0	0	0	0	0	0	0	0	0	0	0	0	0	0	0	0	0	4.51397e-05	5.41401e-05
83	0.119132	44.524	44.608	0	0.00617721	0	0	0	0	0	0.0124153	0.00413996	0	0	0	0	0	0	0.00635298	0.0121919	0.00607314	0	0	0.0155153	0.00579744	0.00402737	0.00372405	0	0	0.0174761	0.000238233	0.000262071	0.000247048
104	0.120683	16.402	16.463	0	0	0	0	0.000433552	0	0	0	0.00047557	0.00077701	0.000826676	0.000494157	0	0	0.000344742	0	0	0	0	0.00169599	0.000984458	0	0.000507516	0	0.000729995	0	0	0	0	0
91	0.125426	20.464	20.633	0	0	0.00215412	0.00163736	0.00108911	0.00117234	0.00185563	0.00217194	0.00124892	0.000940812	0.00398978	0.00235072	0.000815314	0.000329503	0.00120549	0.00121214	0	0	0.00319243	0.00136217	0.000539429	0.00110031	0.00265616	0.000985829	0	0.00125878	0	0.000167618	0	0
340	0.129586	44.559	44.582	0	0	0	0	0.000415826	0.000576254	0.000410139	0	0	0	0	0	0	0	0	0	0.000614084	0.00129945	0	0	0	0.00127928	0.000679366	0	0	0	0	0	4.95918e-05	0
206	0.139004	30.9	31.013	0	0	0	0	0	0.000380335	0	0	0.000631866	0	0	0	0.000279808	0.000123221	0.000190036	0.000630467	0	0.00128719	0.000692659	0	0.000433397	0	0	0	0.000975586	0	0.0015816	0	0	0
71	0.144308	1.874	2.067	0.00102583	0	0	0	0.000539034	0.0006019	0	0.00115069	0.000561998	0	0.000721689	0	0.000368087	0.000295624	0	0.00204551	0.00198978	0.00165398	0.00084536	0	0	0.00103422	0.000766876	0.00124971	0.00153903	0	0	5.47686e-05	5.56253e-05	4.69775e-05
98	0.160714	44.527	44.55	0	0.00166623	0	0	0	0	0	0.00336493	0.00107621	0	0.000743374	0	0	0	0	0.0017083	0.00328637	0.00177149	0	0	0.00416523	0.001548	0.00108014	0.000977869	0	0	0.00466855	7.14747e-05	7.56167e-05	6.66143e-05
116	0.162155	44.562	44.603	0	0	0	0	0	0	0	0.00036798	0	0	0	0	0	0	0	0	0	0.000616356	0	0	0	0.000724211	0.000714877	0	0	0	0	0	0	0
75	0.162155	16.406	16.414	0	0	0	0	0	0	0	0.000343331	0	0	0	0	0	0	0.000289868	0	0	0	0	0	0	0	0.000496313	0.000548031	0	0	0	0	0	0
57	0.168634	15.092	15.123	0.00373025	0.00503271	0	0.00160284	0.00215047	0.00241976	0	0.00248506	0.00198159	0	0	0	0	0.00110952	0	0	0.00364718	0	0	0	0.00186187	0	0.00253082	0.00264488	0	0	0	0	0	0
284	0.16886	44.562	44.591	0	0	0	0	0.000863471	0.000512666	0	0.000478024	0	0	0	0	0	0	0	0	0	0.00181883	0	0	0	0.000878347	0.00146505	0	0	0	0	0	0	0
80	0.177479	3.501	3.555	0	0	0	0.000384272	0	0	0	0	0	0	0	0	0	0.000273952	0.000204958	0	0	0	0	0	0.00034928	0	0	0	0.00162315	0	0	0.000124603	9.93211e-05	0.000126208
101	0.181378	20.37	20.38	0	0	0	0	0	0.00020385	0	0	0	0	0	0	0	0	0	0	0	0	0	0.000476312	0.000229257	0.000385053	0	0	0	0	0	0	0	0
125	0.207776	15.103	15.147	0	0	0	0.000456447	0	0.000914814	0	0.000324566	0	0	0	0	0.00044956	0	0.000302094	0	0.000963043	0	0	0	0.000522235	0.00090115	0.000527174	0.000875595	0	0.000716958	0	4.67898e-05	0.000125741	0.000256233
150	0.212149	10.187	10.429	0	0.00253861	0	0.00063546	0	0	0	0	0	0.000544607	0	0	0	0.000831143	0.000141709	0	0.000424497	0	0.001997	0.00221322	0.000489869	0.00102787	0.000623985	0.000606163	0.00139507	0	0	0	2.33777e-05	0
191	0.222351	22.973	23.059	0	0	0	0	0	0.00394256	0	0	0	0	0	0	0.00200144	0.00288848	0	0	0	0	0	0	0	0	0	0	0	0.00841909	0	0	0.000503842	0.000311726
170	0.222834	22.982	23.031	0	0	0	0	0	0.00205106	0	0	0.00133825	0	0.00224387	0	0	0	0	0	0	0	0	0	0	0	0	0.00208189	0	0	0	0.000156614	0.000221349	0.000199729
81	0.225446	44.532	44.55	0	0	0	0	0	0	0	0.00156908	0.00059163	0	0	0	0	0	0	0	0.00165652	0.000907848	0	0	0.00188429	0	0	0	0	0	0.00262803	0	0	0
124	0.227435	15.112	15.135	0	0	0	0	0	0.000466397	0	0	0	0	0	0	0	0	0	0	0	0	0	0	0.000591855	0	0.000444526	0.000585901	0.00109302	0.00149274	0	0	0	8.81877e-05
67	0.234878	44.527	44.55	0	0	0	0	0	0	0	0.00249969	0.000887663	0	0	0	0	0	0	0	0.00257513	0.00116027	0	0	0.00298439	0.00120914	0.000806192	0	0	0	0.00380923	5.01183e-05	4.74431e-05	4.88144e-05
323	0.240979	22.983	23.063	0	0	0	0	0	0.00536581	0	0	0	0	0	0	0	0	0	0	0	0	0	0	0	0	0	0	0	0.0128846	0	0	0.000748019	0.000774096
248	0.240979	22.976	23.059	0	0	0	0	0	0.00761728	0	0	0	0	0	0	0	0.00347309	0	0	0	0	0	0	0	0	0	0	0	0	0	0	0.000736193	0.00108991
168	0.240979	44.532	44.55	0	0	0	0	0	0	0	0.00135488	0.000415869	0	0	0	0	0	0	0	0.0013908	0	0	0	0.00163548	0	0	0	0	0	0	0	0	0
295	0.240979	44.562	44.582	0	0	0	0	0.000737503	0.000459258	0	0	0	0	0	0	0	0	0	0	0	0.00156242	0	0	0	0	0.00153502	0	0	0	0	0	0	0
292	0.240979	23.006	23.02	0	0	0	0	0	0.000559332	0	0	0	0	0	0	0	0	0	0	0	0	0	0	0	0	0	0	0	0.00102536	0	0	6.37903e-05	8.34601e-05
326	0.240979	22.996	23.025	0	0	0	0	0	0.000371214	0	0	0	0	0	0	0	0	0	0	0	0	0	0	0	0	0	0	0	0.000932099	0	0	0.000121753	0.000127347
164	0.240979	23.002	23.025	0	0	0	0	0	0.000478956	0	0	0	0	0	0	0	0	0	0	0	0	0	0	0	0	0	0	0	0.00084122	0	0	5.09841e-05	5.27019e-05
202	0.240979	23.006	23.02	0	0	0	0	0	0.000423035	0	0	0	0	0	0	0	0	0	0	0	0	0	0	0	0	0	0	0	0.000838836	0	0	4.31285e-05	6.23566e-05
262	0.240979	22.998	23.039	0	0	0	0	0	0.000418541	0	0	0	0	0	0	0	0	0	0	0	0	0	0	0	0	0	0.000781282	0	0	0	0	5.13107e-05	3.1812e-05
178	0.240979	15.118	15.131	0	0	0	0	0	0.000239808	0	0	0	0	0	0	0	0	0	0	0	0	0	0	0.000469977	0	0	0	0	0	0	0	3.66824e-05	4.08401e-05
162	0.249866	22.986	23.049	0	0	0	0	0	0.00217995	0	0	0	0	0	0	0	0	0	0	0	0	0	0	0.00278699	0	0	0	0.00829812	0.00604645	0	0	0	0.000335606
71	0.25055	8.446	8.531	0	0	0	0	0	0.000520862	0	0.000684595	0	0.00100885	0.00114084	0	0.000302656	0.00027404	0.000288039	0	0.00153032	0	0	0	0	0	0	0.000856057	0	0	0	0.000337626	0.000329437	0.000335905
283	0.253559	30.944	30.984	0.00179238	0.000733322	0	0	0	0.000481335	0	0	0.000540209	0	0	0	0	0	0	0	0	0	0.00049397	0	0.000458852	0	0	0	0	0.000663173	0	0	0	0
177	0.256652	22.977	23.045	0.000850605	0	0	0	0.000340419	0.000463488	0	0	0.000309106	0	0	0	0	0.000223354	0.000266089	0	0	0	0	0	0	0.000934056	0	0.000416812	0	0	0	4.50061e-05	0	3.17977e-05
50	0.266774	12.455	12.602	0.00424623	0.0129697	0	0.00127848	0	0.000388135	0.00221337	0.00297692	0.0038737	0	0	0	0.000757369	0	0	0.0114982	0.00151196	0	0.00363096	0	0	0.00242953	0.00237524	0.000931074	0	0	0.0169894	0.00131395	0.00326176	0.00335373
74	0.272707	1.81	1.832	0.000721608	0	0	0	0	0	0	0	0	0	0	0	0.000147974	0	0	0	0	0	0	0	0	0	0	0	0.00144249	0.00054368	0	0	0	2.62299e-05
150	0.288966	30.947	30.991	0.00113996	0	0	0	0	0.000483186	0	0	0.000567953	0	0	0	0.000319184	0.00039328	0	0	0	0.000980293	0.000675056	0.00104523	0.000542632	0	0.000728194	0.000714466	0	0	0	0	5.03309e-05	0
204	0.290703	15.112	15.14	0	0	0	0	0.000341001	0	0	0.000545609	0.000194789	0	0.000628337	0	0.000313739	0.000306327	0.000240289	0	0	0	0	0	0.000504872	0.000656379	0	0	0	0	0	0	0	0
59	0.292933	13.94	13.951	0	0	0	0	0	0.000446699	0	0.000563101	0.00050375	0.000876411	0.000976091	0	0	0	0	0	0.00201644	0	0	0	0	0	0	0.000906711	0	0	0	0	0	0
266	0.294103	15.099	15.146	0	0	0	0.000942279	0	0.00107649	0	0	0	0	0	0	0.000774578	0	0	0	0	0	0	0	0	0	0	0.00159923	0	0	0	0	0	0.000220405
237	0.297044	22.991	23.019	0	0	0	0	0	0.000389721	0.000707145	0.000286401	0	0	0	0	0	0	0	0	0	0	0.000473507	0	0	0	0	0	0	0	0	0	0	0.000106643
269	0.322884	38.127	38.146	0	0	0	0	0.000191204	0.000816459	0	0	0	0	0	0	0	0.000267317	0	0	0	0.000747841	0	0	0	0	0.000741722	0	0	0	0	0	0	0
73	0.327661	27.372	27.382	0	0	0	0	0.000318335	0.000483186	0	0	0	0	0	0	0	0.000472538	0	0	0	0.00124269	0	0	0	0.00080532	0	0	0	0.000794324	0	7.19366e-05	9.42501e-05	7.18403e-05
178	0.3404	38.117	38.157	0	0	0	0	0.000349428	0.000433479	0	0	0	0	0	0	0.000207669	0	0	0	0	0.000816864	0	0	0	0	0.000946969	0	0	0	0	0	0	0
271	0.34394	22.996	23.02	0	0	0	0	0	0.000686639	0.000470398	0	0	0	0	0	0	0	0	0	0	0	0	0	0	0	0.000278383	0.00081288	0	0.000977935	0	0	3.86249e-05	0.000131947
313	0.350731	30.964	31.002	0.000998676	0.000995937	0	0	0	0.000622655	0	0	0.000482542	0	0.000939333	0	0	0.000683242	0	0	0	0	0	0	0	0	0	0	0	0	0	0	0	0
125	0.354711	44.527	44.55	0	0	0	0	0	0	0	0.00225034	0.000782206	0	0	0	0	0	0	0	0.00220484	0.00108811	0	0	0.00278531	0.000994671	0.00074151	0	0	0	0.00320169	0	0	5.31861e-05
73	0.354739	8.446	8.462	0	0	0	0	0	0.000416558	0	0.000565646	0	0.000880611	0.000922408	0	0.000282725	0.000264398	0.000288039	0	0.00119943	0	0	0	0	0	0	0.000897063	0	0	0	5.10898e-05	0	0
112	0.357923	44.527	44.55	0	0	0	0	0	0	0	0.00215476	0.00066789	0	0	0	0	0	0	0	0.00198118	0.00112861	0	0	0.00268686	0.000981105	0.000729673	0	0	0	0.00289292	0	0	4.41152e-05
57	0.363153	8.265	8.531	0	0	0	0	0	0.000436916	0	0.000519529	0	0.000876131	0.000962869	0	0	0.000264221	0	0	0.00127201	0	0	0	0	0	0	0.000867394	0	0.000584747	0	0.000797051	0.000398608	0.000663608
269	0.387744	22.964	23.064	0	0	0	0	0	0.0164143	0	0	0	0	0	0	0	0.0105431	0	0	0	0	0	0	0	0	0	0	0	0.0361423	0	0	0.0033902	0.00264005
252	0.387744	22.986	23.059	0	0	0	0	0	0.00257748	0	0	0	0	0	0	0	0	0	0	0	0	0	0	0	0	0	0.00340783	0	0.00379357	0	0	0.000422793	0.000449411
236	0.387744	22.977	23.048	0	0	0	0	0	0.00273664	0	0	0	0	0	0	0	0.00158807	0	0	0	0	0	0	0	0	0	0	0	0.00553271	0	0	0.000184151	0.000455264
264	0.387744	44.555	44.582	0	0	0	0	0.000480917	0.000385227	0	0	0	0	0	0	0	0	0	0	0	0.00193178	0	0	0	0.00126224	0	0	0	0	0.00170865	0	0	0
194	0.387744	22.996	23.025	0	0	0	0	0	0.00043652	0	0	0	0	0	0	0	0.000227512	0	0	0	0	0	0	0	0	0	0	0	0.00171768	0	0	5.77568e-05	0.000137543
203	0.387744	22.996	23.025	0	0	0	0	0	0.000422242	0	0	0	0	0	0	0	0.00029297	0	0	0	0	0	0	0	0	0	0	0	0.00120897	0	0	0.000119897	0.000135493
87	0.387744	23.002	23.025	0	0	0	0	0	0.000613005	0	0	0	0	0	0	0	0.000272713	0	0	0	0	0	0	0	0	0	0	0	0.00106881	0	0	6.86034e-05	8.06833e-05
308	0.387744	22.996	23.039	0	0	0	0	0	0.000461373	0	0	0	0	0	0	0	0.000296066	0	0	0	0	0	0	0	0	0	0	0	0.000621311	0	0	0.000114156	0.000102029
208	0.387744	23.006	23.02	0	0	0	0	0	0.000521259	0	0	0	0	0	0	0	0.000275898	0	0	0	0	0	0	0	0	0	0	0	0.000604884	0	0	6.04384e-05	7.37912e-05
205	0.388959	15.108	15.149	0.00073454	0.00130407	0	0.000376712	0.000330249	0.00047261	0	0.000414892	0.000334526	0.00105281	0.000990901	0.000528906	0.000312378	0.000206547	0.000197353	0	0.00119351	0	0.000544137	0.00050431	0.000559826	0.000884986	0.000541125	0	0.00201045	0.000853408	0	0	5.89429e-05	0.000192637
104	0.399824	12.605	12.627	0	0	0	0	0.000228835	0	0	0	0	0.000691049	0.000630982	0	0	0	0.000241637	0	0	0	0	0	0	0	0	0.000526081	0	0	0.0019204	0	0	0
306	0.423679	30.956	31.002	0.00177298	0	0	0	0	0.000389589	0	0	0.000738484	0	0	0	0.000232655	0.000772938	0	0	0	0.000997121	0.000518834	0.00112312	0.000768686	0	0.00154749	0.000827594	0.00113197	0	0	0	0	0
55	0.428915	1.874	2.067	0.00109922	0	0	0	0.000580442	0.00065359	0	0.000759654	0	0.00079325	0.00118289	0	0.000433324	0.000360551	0	0.00166868	0.00174716	0.00125981	0.000959556	0	0	0	0	0.00126636	0.00164461	0	0	0.000461496	0.000387263	0.000273207
266	0.437274	22.945	23.088	0	0	0	0	0	0	0	0	0	0	0	0	0	0	0	0	0	0	0	0	0	0	0	0	0	0.231265	0	0	0	0
325	0.437274	30.9	31.023	0	0	0	0	0	0	0	0	0.151532	0	0	0	0	0	0	0	0	0	0	0	0	0	0	0	0	0	0	0	0	0
268	0.437274	22.962	23.063	0	0	0	0	0	0	0	0	0	0	0	0	0	0	0	0	0	0	0	0	0	0	0	0	0	0.0631893	0	0	0	0
326	0.437274	30.902	31.019	0	0	0	0	0	0	0	0	0	0	0	0	0	0.0484386	0	0	0	0	0	0	0	0	0	0	0	0	0	0	0	0
326	0.437274	44.534	44.621	0	0	0	0	0	0	0	0	0	0	0	0	0	0	0	0	0	0.0220881	0	0	0	0	0	0	0	0	0	0	0	0
71	0.437274	6.783	6.783	0	0	0	0	0	0	0	0	0	0	0	0	0	0	0	0	0	0	0	0	0	0	0	0	0	0	0	0	0.0166901	0
71	0.437274	6.87	6.87	0	0	0	0	0	0	0	0	0	0	0	0	0	0	0	0	0	0	0	0	0	0	0	0	0	0	0	0	0	0.0133793
251	0.437274	38.088	38.18	0	0	0	0	0	0	0	0	0	0	0	0	0	0	0	0	0	0	0	0	0	0	0.0109671	0	0	0	0	0	0	0
73	0.437274	22.997	23.028	0	0	0	0	0	0	0	0	0	0	0	0	0	0	0	0	0	0	0	0	0	0	0	0	0	0	0	0	0	0.0108831
294	0.437274	30.921	31.023	0	0	0	0	0	0	0	0	0.00966769	0	0	0	0	0	0	0	0	0	0	0	0	0	0	0	0	0	0	0	0	0
250	0.437274	22.967	23.059	0	0	0	0	0	0.00923619	0	0	0	0	0	0	0	0	0	0	0	0	0	0	0	0	0	0	0	0	0	0	0	0
322	0.437274	22.974	23.063	0	0	0	0	0	0	0	0	0	0	0	0	0	0	0	0	0	0	0	0	0	0	0	0	0	0.0082686	0	0	0	0
221	0.437274	41.485	41.501	0	0	0	0	0.00699494	0	0	0	0	0	0	0	0	0	0	0	0	0	0	0	0	0	0	0	0	0	0	0	0	0
281	0.437274	15.112	15.14	0	0	0	0	0	0	0	0	0	0	0	0	0	0	0	0	0	0	0	0	0	0	0	0	0	0	0	0	0	0.00683789
222	0.437274	22.981	23.045	0	0	0	0	0	0	0	0	0	0	0	0	0	0	0	0	0	0	0	0	0	0	0	0	0	0.0061678	0	0	0	0
178	0.437274	30.921	31.004	0	0	0	0	0	0	0	0	0.00516983	0	0	0	0	0	0	0	0	0	0	0	0	0	0	0	0	0	0	0	0	0
189	0.437274	38.102	38.164	0	0	0	0	0	0	0	0	0	0	0	0	0	0	0	0	0	0	0	0	0	0	0.00465093	0	0	0	0	0	0	0
190	0.437274	15.099	15.159	0	0	0	0	0	0	0	0	0	0	0	0	0	0	0	0	0	0	0	0	0	0	0	0.00452777	0	0	0	0	0	0
116	0.437274	38.083	38.193	0	0	0	0	0	0	0	0	0	0	0	0	0	0	0	0	0	0.00441859	0	0	0	0	0	0	0	0	0	0	0	0
147	0.437274	27.358	27.384	0	0	0	0	0	0	0	0	0	0	0	0	0	0	0	0	0	0.00425488	0	0	0	0	0	0	0	0	0	0	0	0
222	0.437274	30.919	31.019	0	0	0	0	0	0	0	0	0	0	0	0	0	0.00381683	0	0	0	0	0	0	0	0	0	0	0	0	0	0	0	0
73	0.437274	41.485	41.5	0	0	0	0	0.00339867	0	0	0	0	0	0	0	0	0	0	0	0	0	0	0	0	0	0	0	0	0	0	0	0	0
118	0.437274	30.926	31.002	0	0	0	0	0	0	0	0	0	0	0	0	0	0	0	0	0	0	0	0	0	0	0.00306095	0	0	0	0	0	0	0
281	0.437274	34.866	34.876	0	0	0	0	0.00300653	0	0	0	0	0	0	0	0	0	0	0	0	0	0	0	0	0	0	0	0	0	0	0	0	0
205	0.437274	44.557	44.591	0	0	0	0	0.00269459	0	0	0	0	0	0	0	0	0	0	0	0	0	0	0	0	0	0	0	0	0	0	0	0	0
248	0.437274	44.562	44.591	0	0	0	0	0	0	0	0	0	0	0	0	0	0	0	0	0	0.0026317	0	0	0	0	0	0	0	0	0	0	0	0
147	0.437274	41.485	41.505	0	0	0	0	0.00258271	0	0	0	0	0	0	0	0	0	0	0	0	0	0	0	0	0	0	0	0	0	0	0	0	0
327	0.437274	44.561	44.611	0	0	0	0	0.00247447	0	0	0	0	0	0	0	0	0	0	0	0	0	0	0	0	0	0	0	0	0	0	0	0	0
338	0.437274	38.11	38.177	0	0	0	0	0	0	0	0	0	0	0	0	0	0	0	0	0	0	0	0	0	0	0.00246064	0	0	0	0	0	0	0
179	0.437274	30.922	30.985	0	0	0	0	0	0	0	0	0	0	0	0	0	0	0	0	0	0	0.00236292	0	0	0	0	0	0	0	0	0	0	0
329	0.437274	30.919	31.003	0	0	0	0	0	0	0	0	0.00226164	0	0	0	0	0	0	0	0	0	0	0	0	0	0	0	0	0	0	0	0	0
308	0.437274	38.107	38.164	0	0	0	0	0	0	0	0	0	0	0	0	0	0	0	0	0	0	0	0	0	0	0.00223278	0	0	0	0	0	0	0
250	0.437274	15.099	15.156	0	0	0	0	0	0.0021633	0	0	0	0	0	0	0	0	0	0	0	0	0	0	0	0	0	0	0	0	0	0	0	0
117	0.437274	44.542	44.591	0	0	0	0	0.00204353	0	0	0	0	0	0	0	0	0	0	0	0	0	0	0	0	0	0	0	0	0	0	0	0	0
236	0.437274	38.114	38.164	0	0	0	0	0	0	0	0	0	0	0	0	0	0	0	0	0	0	0	0	0	0	0.001936	0	0	0	0	0	0	0
282	0.437274	15.112	15.143	0	0	0	0	0	0	0	0	0	0	0	0	0	0	0	0	0	0	0	0	0	0	0	0	0	0	0	0	0	0.00193358
280	0.437274	30.921	31.003	0	0	0	0	0	0	0	0	0	0	0	0	0	0	0	0	0	0	0.00175079	0	0	0	0	0	0	0	0	0	0	0
266	0.437274	34.866	34.883	0	0	0	0	0.00174569	0	0	0	0	0	0	0	0	0	0	0	0	0	0	0	0	0	0	0	0	0	0	0	0	0
63	0.437274	3.207	3.207	0	0	0	0	0.0017361	0	0	0	0	0	0	0	0	0	0	0	0	0	0	0	0	0	0	0	0	0	0	0	0	0
295	0.437274	41.495	41.505	0	0	0	0	0.0016819	0	0	0	0	0	0	0	0	0	0	0	0	0	0	0	0	0	0	0	0	0	0	0	0	0
222	0.437274	41.487	41.5	0	0	0	0	0.00162829	0	0	0	0	0	0	0	0	0	0	0	0	0	0	0	0	0	0	0	0	0	0	0	0	0
341	0.437274	41.487	41.505	0	0	0	0	0.00158296	0	0	0	0	0	0	0	0	0	0	0	0	0	0	0	0	0	0	0	0	0	0	0	0	0
60	0.437274	2.191	2.234	0	0	0	0	0	0	0	0	0	0	0	0	0	0	0	0	0	0	0	0	0	0	0	0	0	0	0	0	0.00139978	0
119	0.437274	10.283	10.283	0	0	0	0	0	0	0	0	0	0	0	0	0	0	0	0	0	0	0	0	0	0	0	0	0.00132957	0	0	0	0	0
60	0.437274	2.32	2.32	0	0	0	0	0	0	0	0	0	0	0	0	0	0	0	0	0	0	0	0	0	0	0	0	0	0	0	0	0	0.00113637
292	0.437274	30.944	30.991	0	0	0	0	0	0	0	0	0	0	0	0	0	0.00113269	0	0	0	0	0	0	0	0	0	0	0	0	0	0	0	0
147	0.437274	20.436	20.436	0	0	0	0	0	0	0	0	0	0	0	0	0	0	0	0	0	0	0	0	0	0.00105067	0	0	0	0	0	0	0	0
128	0.437274	11.774	11.774	0	0	0	0	0	0	0	0.00101807	0	0	0	0	0	0	0	0	0	0	0	0	0	0	0	0	0	0	0	0	0	0
193	0.437274	44.563	44.563	0	0	0	0	0	0	0	0	0	0	0	0	0	0	0	0	0	0.0010091	0	0	0	0	0	0	0	0	0	0	0	0
53	0.437274	6.99	6.99	0	0	0	0	0	0	0	0	0	0	0	0	0	0	0	0	0	0	0	0	0	0	0	0	0	0	0	0.00100167	0	0
132	0.437274	15.092	15.164	0	0	0	0	0.000942801	0	0	0	0	0	0	0	0	0	0	0	0	0	0	0	0	0	0	0	0	0	0	0	0	0
189	0.437274	44.582	44.582	0	0	0	0	0	0	0	0	0	0	0	0	0	0	0	0	0	0.000942645	0	0	0	0	0	0	0	0	0	0	0	0
339	0.437274	22.976	23.063	0	0	0	0	0	0	0	0	0	0	0	0	0	0	0	0	0	0	0	0	0	0	0	0	0	0	0	0	0	0.000936203
74	0.437274	22.99	23.028	0	0	0	0	0	0	0	0	0	0	0	0	0	0	0	0	0	0	0	0	0	0	0	0	0	0	0	0	0	0.000920425
223	0.437274	41.505	41.505	0	0	0	0	0.000907349	0	0	0	0	0	0	0	0	0	0	0	0	0	0	0	0	0	0	0	0	0	0	0	0	0
53	0.437274	6.783	6.783	0	0	0	0	0	0	0	0	0	0	0	0	0	0	0	0	0	0	0	0	0	0	0	0	0	0	0	0	0.000885604	0
57	0.437274	6.99	6.99	0	0	0	0	0	0	0	0	0	0	0	0	0	0	0	0	0	0	0	0	0	0	0	0	0	0	0	0.000881474	0	0
55	0.437274	6.783	6.783	0	0	0	0	0	0	0	0	0	0	0	0	0	0	0	0	0	0	0	0	0	0	0	0	0	0	0	0	0.000866077	0
72	0.437274	6.99	6.99	0	0	0	0	0	0	0	0	0	0	0	0	0	0	0	0	0	0	0	0	0	0	0	0	0	0	0	0.000832868	0	0
189	0.437274	30.948	30.991	0	0	0	0	0	0	0	0	0	0	0	0	0	0.000824774	0	0	0	0	0	0	0	0	0	0	0	0	0	0	0	0
249	0.437274	22.974	23.063	0	0	0	0	0	0	0	0	0	0	0	0	0	0	0	0	0	0	0	0	0	0	0	0	0	0	0	0	0	0.000793177
72	0.437274	6.783	6.783	0	0	0	0	0	0	0	0	0	0	0	0	0	0	0	0	0	0	0	0	0	0	0	0	0	0	0	0	0.000784341	0
53	0.437274	6.87	6.87	0	0	0	0	0	0	0	0	0	0	0	0	0	0	0	0	0	0	0	0	0	0	0	0	0	0	0	0	0	0.000709518
52	0.437274	1.765	1.765	0	0	0	0	0	0	0	0	0	0	0	0	0	0	0	0	0	0	0	0	0.000702438	0	0	0	0	0	0	0	0	0
88	0.437274	18.696	18.696	0	0	0	0	0	0	0	0	0	0	0.000685459	0	0	0	0	0	0	0	0	0	0	0	0	0	0	0	0	0	0	0
69	0.437274	44.634	44.634	0	0	0	0	0	0	0	0.000684118	0	0	0	0	0	0	0	0	0	0	0	0	0	0	0	0	0	0	0	0	0	0
55	0.437274	6.87	6.87	0	0	0	0	0	0	0	0	0	0	0	0	0	0	0	0	0	0	0	0	0	0	0	0	0	0	0	0	0	0.000682035
76	0.437274	3.543	3.543	0	0	0	0	0	0	0	0.000667262	0	0	0	0	0	0	0	0	0	0	0	0	0	0	0	0	0	0	0	0	0	0
90	0.437274	18.745	18.745	0	0	0	0	0	0	0	0	0	0	0	0	0	0	0	0	0	0.000645733	0	0	0	0	0	0	0	0	0	0	0	0
286	0.437274	38.128	38.128	0	0	0	0	0	0	0	0	0	0	0	0	0	0	0	0	0	0	0	0	0	0	0.000641318	0	0	0	0	0	0	0
72	0.437274	6.87	6.87	0	0	0	0	0	0	0	0	0	0	0	0	0	0	0	0	0	0	0	0	0	0	0	0	0	0	0	0	0	0.000619792
57	0.437274	5.819	5.819	0	0	0	0	0	0	0	0	0	0	0	0	0	0	0	0	0	0	0	0	0.00061714	0	0	0	0	0	0	0	0	0
88	0.437274	16.437	16.437	0	0	0	0	0	0	0	0	0	0	0	0	0	0	0	0	0	0	0	0	0	0	0	0	0	0.000600909	0	0	0	0
93	0.437274	27.412	27.412	0	0	0	0	0	0	0	0	0	0	0	0	0	0	0	0	0	0	0	0	0.000596912	0	0	0	0	0	0	0	0	0
69	0.437274	6.87	6.87	0	0	0	0	0	0	0	0	0	0	0	0	0	0	0	0	0	0	0	0	0	0	0	0	0	0	0	0	0	0.000557706
192	0.437274	22.977	23.063	0	0	0	0	0	0	0	0	0	0	0	0	0	0	0	0	0	0	0	0	0	0	0	0	0	0	0	0	0	0.000537144
75	0.437274	6.99	6.99	0	0	0	0	0	0	0	0	0	0	0	0	0	0	0	0	0	0	0	0	0	0	0	0	0	0	0	0.000536761	0	0
283	0.437274	34.866	34.866	0	0	0	0	0.000535837	0	0	0	0	0	0	0	0	0	0	0	0	0	0	0	0	0	0	0	0	0	0	0	0	0
281	0.437274	41.487	41.487	0	0	0	0	0.00052988	0	0	0	0	0	0	0	0	0	0	0	0	0	0	0	0	0	0	0	0	0	0	0	0	0
73	0.437274	2.819	2.819	0	0	0	0	0	0	0	0	0	0	0	0	0	0	0	0	0	0	0	0	0	0	0	0	0	0.000526723	0	0	0	0
191	0.437274	15.099	15.161	0	0	0	0	0	0	0	0	0	0	0	0	0	0	0	0	0	0	0	0	0	0	0	0	0	0	0	0	0	0.000509134
75	0.437274	6.783	6.783	0	0	0	0	0	0	0	0	0	0	0	0	0	0	0	0	0	0	0	0	0	0	0	0	0	0	0	0	0.000507847	0
69	0.437274	19.856	19.856	0	0	0	0	0	0	0	0	0	0	0	0	0	0	0	0	0	0	0	0	0.000507737	0	0	0	0	0	0	0	0	0
69	0.437274	15.373	15.373	0	0	0	0	0.000506779	0	0	0	0	0	0	0	0	0	0	0	0	0	0	0	0	0	0	0	0	0	0	0	0	0
74	0.437274	8.415	8.453	0	0	0	0	0	0	0	0	0	0	0	0	0	0	0	0	0	0	0	0	0	0	0	0	0	0	0	0.000484126	0	0
58	0.437274	44.539	44.539	0	0	0	0	0	0	0	0	0	0	0	0	0	0	0	0	0	0	0	0	0.000482115	0	0	0	0	0	0	0	0	0
129	0.437274	13.317	13.317	0	0	0	0	0.000479028	0	0	0	0	0	0	0	0	0	0	0	0	0	0	0	0	0	0	0	0	0	0	0	0	0
58	0.437274	31.003	31.003	0	0	0	0	0	0	0	0	0	0	0	0	0	0	0	0	0	0	0.000473067	0	0	0	0	0	0	0	0	0	0	0
146	0.437274	34.873	34.873	0	0	0	0	0	0	0	0	0	0	0	0	0	0	0	0	0	0	0	0	0	0	0	0.000464813	0	0	0	0	0	0
74	0.437274	34.866	34.866	0	0	0	0	0.000459995	0	0	0	0	0	0	0	0	0	0	0	0	0	0	0	0	0	0	0	0	0	0	0	0	0
296	0.437274	41.487	41.487	0	0	0	0	0.000457089	0	0	0	0	0	0	0	0	0	0	0	0	0	0	0	0	0	0	0	0	0	0	0	0	0
149	0.437274	34.866	34.866	0	0	0	0	0.000453747	0	0	0	0	0	0	0	0	0	0	0	0	0	0	0	0	0	0	0	0	0	0	0	0	0
67	0.437274	15.297	15.297	0	0	0	0	0	0	0	0	0.000453055	0	0	0	0	0	0	0	0	0	0	0	0	0	0	0	0	0	0	0	0	0
118	0.437274	18.745	18.745	0	0	0	0	0	0	0	0	0	0	0	0	0	0	0	0	0	0	0	0	0.000450086	0	0	0	0	0	0	0	0	0
87	0.437274	6.99	6.99	0	0	0	0	0	0	0	0	0	0	0	0	0	0	0	0	0	0	0	0	0	0	0	0	0	0	0	0.000447402	0	0
169	0.437274	23	23	0	0	0	0	0	0	0	0	0	0	0	0	0	0	0	0	0	0	0.000444023	0	0	0	0	0	0	0	0	0	0	0
251	0.437274	22.983	23.063	0	0	0	0	0	0	0	0	0	0	0	0	0	0	0	0	0	0	0	0	0	0	0	0	0	0	0	0	0.000428775	0
120	0.437274	38.773	38.773	0	0	0	0.000426065	0	0	0	0	0	0	0	0	0	0	0	0	0	0	0	0	0	0	0	0	0	0	0	0	0	0
87	0.437274	6.783	6.783	0	0	0	0	0	0	0	0	0	0	0	0	0	0	0	0	0	0	0	0	0	0	0	0	0	0	0	0	0.000424684	0
75	0.437274	22.997	23.049	0	0	0	0	0	0	0	0	0	0	0	0	0	0	0	0	0	0	0	0	0	0	0	0	0	0	0	0	0	0.000418497
54	0.437274	6.717	6.783	0	0	0	0	0	0	0	0	0	0	0	0	0	0	0	0	0	0	0	0	0	0	0	0	0	0	0	0	0.000411552	0
107	0.437274	21.404	21.404	0	0	0	0	0	0	0	0	0.00041064	0	0	0	0	0	0	0	0	0	0	0	0	0	0	0	0	0	0	0	0	0
84	0.437274	3.841	3.841	0	0	0	0	0	0	0	0	0	0	0	0	0	0	0	0	0	0	0	0	0	0	0	0	0	0	0	0	0	0.000404898
82	0.437274	12.494	12.494	0	0	0	0	0	0.000404792	0	0	0	0	0	0	0	0	0	0	0	0	0	0	0	0	0	0	0	0	0	0	0	0
75	0.437274	6.87	6.87	0	0	0	0	0	0	0	0	0	0	0	0	0	0	0	0	0	0	0	0	0	0	0	0	0	0	0	0	0	0.000391768
207	0.437274	34.866	34.866	0	0	0	0	0.0003904	0	0	0	0	0	0	0	0	0	0	0	0	0	0	0	0	0	0	0	0	0	0	0	0	0
280	0.437274	27.38	27.38	0	0	0	0	0	0	0	0	0	0	0	0	0	0	0	0	0	0	0	0	0.000389569	0	0	0	0	0	0	0	0	0
75	0.437274	3.543	3.543	0	0	0	0	0	0	0	0.000379588	0	0	0	0	0	0	0	0	0	0	0	0	0	0	0	0	0	0	0	0	0	0
73	0.437274	17.407	17.407	0	0	0	0	0	0.000371346	0	0	0	0	0	0	0	0	0	0	0	0	0	0	0	0	0	0	0	0	0	0	0	0
121	0.437274	38.752	38.752	0	0	0	0.000371149	0	0	0	0	0	0	0	0	0	0	0	0	0	0	0	0	0	0	0	0	0	0	0	0	0	0
59	0.437274	22.991	23.027	0	0	0	0	0	0	0	0	0	0	0	0	0	0	0	0	0	0	0	0	0	0	0	0	0	0	0	0	0	0.000362377
61	0.437274	13.606	13.606	0	0	0	0.000360736	0	0	0	0	0	0	0	0	0	0	0	0	0	0	0	0	0	0	0	0	0	0	0	0	0	0
61	0.437274	16.86	16.86	0	0	0	0	0	0.000351913	0	0	0	0	0	0	0	0	0	0	0	0	0	0	0	0	0	0	0	0	0	0	0	0
251	0.437274	44.577	44.577	0	0	0	0	0	0.00034874	0	0	0	0	0	0	0	0	0	0	0	0	0	0	0	0	0	0	0	0	0	0	0	0
74	0.437274	15.246	15.246	0	0	0	0	0	0	0.000346546	0	0	0	0	0	0	0	0	0	0	0	0	0	0	0	0	0	0	0	0	0	0	0
74	0.437274	8.682	8.682	0	0	0	0	0	0	0	0	0	0	0	0	0	0	0	0	0	0	0	0	0	0	0	0	0	0	0	0	0	0.000337372
54	0.437274	6.962	6.99	0	0	0	0	0	0	0	0	0	0	0	0	0	0	0	0	0	0	0	0	0	0	0	0	0	0	0	0.000331558	0	0
87	0.437274	6.87	6.87	0	0	0	0	0	0	0	0	0	0	0	0	0	0	0	0	0	0	0	0	0	0	0	0	0	0	0	0	0	0.000321395
206	0.437274	41.5	41.5	0	0	0	0	0	0	0	0	0	0	0	0	0	0	0	0	0	0	0	0	0	0.000320396	0	0	0	0	0	0	0	0
104	0.437274	12.454	12.454	0	0	0	0	0	0	0	0	0	0	0	0	0	0	0	0	0.000320224	0	0	0	0	0	0	0	0	0	0	0	0	0
64	0.437274	18.659	18.659	0	0	0	0	0	0	0	0	0	0	0	0	0	0	0	0	0	0	0	0	0	0	0.000318968	0	0	0	0	0	0	0
249	0.437274	15.088	15.161	0	0	0	0	0	0	0	0	0	0	0	0	0	0	0	0	0	0	0	0	0	0	0	0	0	0	0	0	0	0.00031651
265	0.437274	22.99	23.045	0	0	0	0	0	0	0	0	0	0	0	0	0	0	0	0	0	0	0	0	0	0	0	0	0	0	0	0	0	0.000311982
51	0.437274	6.717	6.783	0	0	0	0	0	0	0	0	0	0	0	0	0	0	0	0	0	0	0	0	0	0	0	0	0	0	0	0	0.00030881	0
58	0.437274	2.25	2.25	0	0	0	0	0	0	0	0	0	0	0	0	0	0	0	0	0	0	0.000308484	0	0	0	0	0	0	0	0	0	0	0
57	0.437274	13.637	13.637	0	0	0	0	0	0	0	0	0	0	0	0	0	0	0.000286113	0	0	0	0	0	0	0	0	0	0	0	0	0	0	0
119	0.437274	6.346	6.346	0	0	0	0	0	0	0	0	0.000278457	0	0	0	0	0	0	0	0	0	0	0	0	0	0	0	0	0	0	0	0	0
91	0.437274	21.404	21.404	0	0	0	0	0	0	0	0	0.000274825	0	0	0	0	0	0	0	0	0	0	0	0	0	0	0	0	0	0	0	0	0
74	0.437274	8.306	8.306	0	0	0	0	0	0	0	0	0	0	0	0	0	0	0	0	0	0	0	0	0	0	0	0	0	0	0	0	0.000274087	0
337	0.437274	30.955	30.955	0	0	0	0	0	0	0	0	0	0	0	0	0	0.000270059	0	0	0	0	0	0	0	0	0	0	0	0	0	0	0	0
58	0.437274	6.934	6.99	0	0	0	0	0	0	0	0	0	0	0	0	0	0	0	0	0	0	0	0	0	0	0	0	0	0	0	0.000263459	0	0
143	0.437274	8.415	8.415	0	0	0	0	0	0	0	0	0	0	0	0	0	0	0	0	0	0	0	0	0	0	0	0	0	0	0	0.000262329	0	0
51	0.437274	18.69	18.69	0	0	0	0	0	0	0	0	0	0	0	0	0	0.000261037	0	0	0	0	0	0	0	0	0	0	0	0	0	0	0	0
340	0.437274	22.997	23.045	0	0	0	0	0	0	0	0	0	0	0	0	0	0	0	0	0	0	0	0	0	0	0	0	0	0	0	0	0	0.00025441
69	0.437274	8.508	8.559	0	0	0	0	0	0	0	0	0	0	0	0	0	0	0	0	0	0	0	0	0	0	0	0	0	0	0	0	0	0.000253413
284	0.437274	15.108	15.141	0	0	0	0	0	0	0	0	0	0	0	0	0	0	0	0	0	0	0	0	0	0	0	0	0	0	0	0	0	0.000243702
88	0.437274	16.865	16.865	0	0	0	0	0	0	0	0	0	0	0	0	0.000229739	0	0	0	0	0	0	0	0	0	0	0	0	0	0	0	0	0
104	0.437274	10.082	10.339	0	0	0	0	0	0	0	0	0	0	0	0	0	0	0	0	0	0	0	0	0	0	0	0	0	0	0	0.000227085	0	0
51	0.437274	6.99	6.99	0	0	0	0	0	0	0	0	0	0	0	0	0	0	0	0	0	0	0	0	0	0	0	0	0	0	0	0.000223629	0	0
84	0.437274	6.99	6.99	0	0	0	0	0	0	0	0	0	0	0	0	0	0	0	0	0	0	0	0	0	0	0	0	0	0	0	0.000220444	0	0
84	0.437274	6.759	6.759	0	0	0	0	0	0	0	0	0	0	0	0	0	0	0	0	0	0	0	0	0	0	0	0	0	0	0	0	0.000198831	0
340	0.437274	41.487	41.487	0	0	0	0	0.000195127	0	0	0	0	0	0	0	0	0	0	0	0	0	0	0	0	0	0	0	0	0	0	0	0	0
341	0.437274	27.624	27.667	0	0	0	0	0	0	0	0	0	0	0	0	0	0	0	0	0	0	0	0	0	0	0	0	0	0	0	0.000193705	0	0
78	0.437274	2.484	2.486	0	0	0	0	0	0	0	0	0	0	0	0	0	0.000189829	0	0	0	0	0	0	0	0	0	0	0	0	0	0	0	0
86	0.437274	8.511	8.511	0	0	0	0	0	0	0	0	0	0	0	0	0	0	0.000183009	0	0	0	0	0	0	0	0	0	0	0	0	0	0	0
98	0.437274	39.102	39.102	0	0	0	0	0	0	0	0	0	0	0	0	0	0	0	0	0	0	0	0	0	0	0	0	0	0	0	0	0	0.000182912
56	0.437274	8.508	8.559	0	0	0	0	0	0	0	0	0	0	0	0	0	0	0	0	0	0	0	0	0	0	0	0	0	0	0	0	0	0.000177771
56	0.437274	6.783	6.783	0	0	0	0	0	0	0	0	0	0	0	0	0	0	0	0	0	0	0	0	0	0	0	0	0	0	0	0	0.000172634	0
84	0.437274	6.87	6.87	0	0	0	0	0	0	0	0	0	0	0	0	0	0	0	0	0	0	0	0	0	0	0	0	0	0	0	0	0	0.00016823
57	0.437274	8.682	8.682	0	0	0	0	0	0	0	0	0	0	0	0	0	0	0	0	0	0	0	0	0	0	0	0	0	0	0	0	0	0.000168017
83	0.437274	20.156	20.156	0	0	0	0	0	0	0	0	0	0	0	0	0	0	0	0	0	0	0	0	0	0	0	0	0	0	0	0	0	0.000160341
51	0.437274	6.87	6.87	0	0	0	0	0	0	0	0	0	0	0	0	0	0	0	0	0	0	0	0	0	0	0	0	0	0	0	0	0	0.000154702
251	0.437274	21.146	21.146	0	0	0	0	0	0	0	0	0	0	0	0	0	0	0.000154224	0	0	0	0	0	0	0	0	0	0	0	0	0	0	0
57	0.437274	5.072	5.091	0	0	0	0	0	0	0	0	0	0	0	0	0	0	0	0	0	0	0	0	0	0	0	0	0	0	0	0	0	0.000153948
113	0.437274	36.63	36.63	0	0	0	0	0	0	0	0	0	0	0	0	0	0	0	0	0	0	0	0	0	0	0	0	0	0	0	0	0	0.00015352
96	0.437274	21.685	21.685	0	0	0	0	0	0	0	0	0	0	0	0	0	0	0	0	0	0	0	0	0	0	0	0	0	0	0	0.000153285	0	0
126	0.437274	36.63	36.63	0	0	0	0	0	0	0	0	0	0	0	0	0	0	0	0	0	0	0	0	0	0	0	0	0	0	0	0	0	0.000143624
57	0.437274	5.2	5.2	0	0	0	0	0	0	0	0	0	0	0	0	0	0	0	0	0	0	0	0	0	0	0	0	0	0	0	0.000143061	0	0
128	0.437274	8.415	8.435	0	0	0	0	0	0	0	0	0	0	0	0	0	0	0	0	0	0	0	0	0	0	0	0	0	0	0	0.000142551	0	0
50	0.437274	6.962	6.99	0	0	0	0	0	0	0	0	0	0	0	0	0	0	0	0	0	0	0	0	0	0	0	0	0	0	0	0.000140226	0	0
73	0.437274	6.962	6.99	0	0	0	0	0	0	0	0	0	0	0	0	0	0	0	0	0	0	0	0	0	0	0	0	0	0	0	0.000137598	0	0
73	0.437274	8.647	8.682	0	0	0	0	0	0	0	0	0	0	0	0	0	0	0	0	0	0	0	0	0	0	0	0	0	0	0	0	0	0.00013293
190	0.437274	19.308	19.391	0	0	0	0	0	0	0	0	0	0	0	0	0	0	0	0	0	0	0	0	0	0	0	0	0	0	0	0.000132247	0	0
86	0.437274	38.096	38.096	0	0	0	0	0	0	0	0	0	0	0	0	0.000131349	0	0	0	0	0	0	0	0	0	0	0	0	0	0	0	0	0
54	0.437274	6.87	6.87	0	0	0	0	0	0	0	0	0	0	0	0	0	0	0	0	0	0	0	0	0	0	0	0	0	0	0	0	0	0.000126749
128	0.437274	8.274	8.274	0	0	0	0	0	0	0	0	0	0	0	0	0	0	0	0	0	0	0	0	0	0	0	0	0	0	0	0	0.000124744	0
84	0.437274	4.947	4.972	0	0	0	0	0	0	0	0	0	0	0	0	0	0	0	0	0	0	0	0	0	0	0	0	0	0	0	0.000122437	0	0
255	0.437274	30.991	30.991	0	0	0	0	0	0	0	0	0	0	0	0	0	0.00012039	0	0	0	0	0	0	0	0	0	0	0	0	0	0	0	0
253	0.437274	22.976	23.063	0	0	0	0	0	0	0	0	0	0	0	0	0	0	0	0	0	0	0	0	0	0	0	0	0	0	0	0	0	0.000115913
60	0.437274	9.288	9.32	0	0	0	0	0	0	0	0	0	0	0	0	0	0	0	0	0	0	0	0	0	0	0	0	0	0	0	0	0.000113812	0
131	0.437274	5.371	5.371	0	0	0	0	0	0	0	0	0	0	0	0	0	0	0	0	0	0	0	0	0	0	0	0	0	0	0	0.000113009	0	0
73	0.437274	6.849	6.87	0	0	0	0	0	0	0	0	0	0	0	0	0	0	0	0	0	0	0	0	0	0	0	0	0	0	0	0	0	0.000112524
55	0.437274	8.508	8.559	0	0	0	0	0	0	0	0	0	0	0	0	0	0	0	0	0	0	0	0	0	0	0	0	0	0	0	0	0	0.000109605
56	0.437274	36.63	36.63	0	0	0	0	0	0	0	0	0	0	0	0	0	0	0	0	0	0	0	0	0	0	0	0	0	0	0	0	0	0.000109334
60	0.437274	5.238	5.261	0	0	0	0	0	0	0	0	0	0	0	0	0	0	0	0	0	0	0	0	0	0	0	0	0	0	0	0	0	0.000105717
60	0.437274	5.371	5.392	0	0	0	0	0	0	0	0	0	0	0	0	0	0	0	0	0	0	0	0	0	0	0	0	0	0	0	0.000105444	0	0
85	0.437274	10.384	10.384	0	0	0	0	0	0	0	0	0	0	0	0	0	0	0	0	0	0	0	0	0	0	0	0	0	0	0	0	0.000104031	0
127	0.437274	8.274	8.274	0	0	0	0	0	0	0	0	0	0	0	0	0	0	0	0	0	0	0	0	0	0	0	0	0	0	0	0	0.000103326	0
57	0.437274	36.739	36.739	0	0	0	0	0	0	0	0	0	0	0	0	0	0	0	0	0	0	0	0	0	0	0	0	0	0	0	0	0	0.000101701
135	0.437274	10.466	10.466	0	0	0	0	0	0	0	0	0	0	0	0	0	0	0	0	0	0	0	0	0	0	0	0	0	0	0	0	0	0.000100406
70	0.437274	36.63	36.63	0	0	0	0	0	0	0	0	0	0	0	0	0	0	0	0	0	0	0	0	0	0	0	0	0	0	0	0	0	9.80275e-05
57	0.437274	4.962	4.962	0	0	0	0	0	0	0	0	0	0	0	0	0	0	0	0	0	0	0	0	0	0	0	0	0	0	0	0	9.66051e-05	0
128	0.437274	8.341	8.341	0	0	0	0	0	0	0	0	0	0	0	0	0	0	0	0	0	0	0	0	0	0	0	0	0	0	0	0	0	9.29439e-05
53	0.437274	8.103	8.126	0	0	0	0	0	0	0	0	0	0	0	0	0	0	0	0	0	0	0	0	0	0	0	0	0	0	0	0	0	9.22888e-05
78	0.437274	3.286	3.286	0	0	0	0	0	0	0	0	0	0	0	0	0	0	0	0	0	0	0	0	0	0	0	0	0	0	0	9.06812e-05	0	0
131	0.437274	5.261	5.261	0	0	0	0	0	0	0	0	0	0	0	0	0	0	0	0	0	0	0	0	0	0	0	0	0	0	0	0	0	9.06085e-05
88	0.437274	12.029	12.029	0	0	0	0	0	0	0	0	0	0	0	0	0	0	0	0	0	0	0	0	0	0	0	0	0	0	0	0	0	9.02241e-05
324	0.437274	27.624	27.643	0	0	0	0	0	0	0	0	0	0	0	0	0	0	0	0	0	0	0	0	0	0	0	0	0	0	0	9.02193e-05	0	0
70	0.437274	3.747	3.747	0	0	0	0	0	0	0	0	0	0	0	0	0	0	0	0	0	0	0	0	0	0	0	0	0	0	0	0	0	8.83586e-05
52	0.437274	6.99	6.99	0	0	0	0	0	0	0	0	0	0	0	0	0	0	0	0	0	0	0	0	0	0	0	0	0	0	0	8.72571e-05	0	0
282	0.437274	21.169	21.188	0	0	0	0	0	0	0	0	0	0	0	0	0	0	0	0	0	0	0	0	0	0	0	0	0	0	0	8.58716e-05	0	0
61	0.437274	8.682	8.682	0	0	0	0	0	0	0	0	0	0	0	0	0	0	0	0	0	0	0	0	0	0	0	0	0	0	0	0	0	8.52116e-05
65	0.437274	6.962	6.99	0	0	0	0	0	0	0	0	0	0	0	0	0	0	0	0	0	0	0	0	0	0	0	0	0	0	0	8.27501e-05	0	0
154	0.437274	36.63	36.63	0	0	0	0	0	0	0	0	0	0	0	0	0	0	0	0	0	0	0	0	0	0	0	0	0	0	0	0	0	8.13811e-05
75	0.437274	25.024	25.024	0	0	0	0	0	0	0	0	0	0	0	0	0	0	0	0	0	0	0	0	0	0	0	0	0	0	0	0	8.0722e-05	0
92	0.437274	14.453	14.476	0	0	0	0	0	0	0	0	0	0	0	0	0	0	0	0	0	0	0	0	0	0	0	0	0	0	0	0	0	7.99001e-05
88	0.437274	9.905	9.954	0	0	0	0	0	0	0	0	0	0	0	0	0	0	0	0	0	0	0	0	0	0	0	0	0	0	0	0	0	7.98859e-05
75	0.437274	8.274	8.274	0	0	0	0	0	0	0	0	0	0	0	0	0	0	0	0	0	0	0	0	0	0	0	0	0	0	0	0	7.87968e-05	0
55	0.437274	4.962	4.962	0	0	0	0	0	0	0	0	0	0	0	0	0	0	0	0	0	0	0	0	0	0	0	0	0	0	0	0	7.75419e-05	0
131	0.437274	5.155	5.155	0	0	0	0	0	0	0	0	0	0	0	0	0	0	0	0	0	0	0	0	0	0	0	0	0	0	0	0	7.50666e-05	0
127	0.437274	8.341	8.341	0	0	0	0	0	0	0	0	0	0	0	0	0	0	0	0	0	0	0	0	0	0	0	0	0	0	0	0	0	7.42896e-05
122	0.437274	14.476	14.476	0	0	0	0	0	0	0	0	0	0	0	0	0	0	0	0	0	0	0	0	0	0	0	0	0	0	0	0	0	7.24099e-05
77	0.437274	22.922	22.922	0	0	0	0	0	0	0	0	0	0	0	0	0	0	0	0	0	0	0	0	0	0	0	0	0	0	0	0	0	7.11568e-05
60	0.437274	5.119	5.119	0	0	0	0	0	0	0	0	0	0	0	0	0	0	0	0	0	0	0	0	0	0	0	0	0	0	0	0	7.10099e-05	0
283	0.437274	26.67	26.67	0	0	0	0	0	0	0	0	0	0	0	0	0	0	0	0	0	0	0	0	0	0	0	0	0	0	0	6.99936e-05	0	0
85	0.437274	16.302	16.302	0	0	0	0	0	0	0	0	0	0	0	0	0	0	0	0	0	0	0	0	0	0	0	0	0	0	0	0	0	6.95477e-05
71	0.437274	15.442	15.442	0	0	0	0	0	0	0	0	0	0	0	0	0	0	0	0	0	0	0	0	0	0	0	0	0	0	0	0	0	6.82946e-05
85	0.437274	23.245	23.245	0	0	0	0	0	0	0	0	0	0	0	0	0	0	0	0	0	0	0	0	0	0	0	0	0	0	0	0	0	6.76396e-05
59	0.437274	12.48	12.483	0	0	0	0	0	0	0	0	0	0	0	0	0	0	0	0	0	0	0	0	0	0	0	0	0	0	0	0	0	6.69276e-05
73	0.437274	6.759	6.759	0	0	0	0	0	0	0	0	0	0	0	0	0	0	0	0	0	0	0	0	0	0	0	0	0	0	0	0	6.58015e-05	0
69	0.437274	20.228	20.228	0	0	0	0	0	0	0	0	0	0	0	0	0	0	0	0	0	0	0	0	0	0	0	0	0	0	0	0	0	6.54039e-05
76	0.437274	8.435	8.435	0	0	0	0	0	0	0	0	0	0	0	0	0	0	0	0	0	0	0	0	0	0	0	0	0	0	0	6.37189e-05	0	0
57	0.437274	22.945	22.945	0	0	0	0	0	0	0	0	0	0	0	0	0	0	0	0	0	0	0	0	0	0	0	0	0	0	0	0	0	6.36951e-05
57	0.437274	23.245	23.245	0	0	0	0	0	0	0	0	0	0	0	0	0	0	0	0	0	0	0	0	0	0	0	0	0	0	0	0	0	6.3154e-05
67	0.437274	19.586	19.586	0	0	0	0	0	0	0	0	0	0	0	0	0	0	0	0	0	0	0	0	0	0	0	0	0	0	0	6.305e-05	0	0
127	0.437274	8.435	8.435	0	0	0	0	0	0	0	0	0	0	0	0	0	0	0	0	0	0	0	0	0	0	0	0	0	0	0	6.30341e-05	0	0
69	0.437274	8.682	8.682	0	0	0	0	0	0	0	0	0	0	0	0	0	0	0	0	0	0	0	0	0	0	0	0	0	0	0	0	0	6.30116e-05
88	0.437274	25.024	25.024	0	0	0	0	0	0	0	0	0	0	0	0	0	0	0	0	0	0	0	0	0	0	0	0	0	0	0	0	6.27761e-05	0
72	0.437274	10.539	10.539	0	0	0	0	0	0	0	0	0	0	0	0	0	0	0	0	0	0	0	0	0	0	0	0	0	0	0	0	6.13494e-05	0
114	0.437274	8.274	8.274	0	0	0	0	0	0	0	0	0	0	0	0	0	0	0	0	0	0	0	0	0	0	0	0	0	0	0	0	6.11775e-05	0
118	0.437274	32.879	32.879	0	0	0	0	0	0	0	0	0	0	0	0	0	0	0	0	0	0	0	0	0	0	0	0	0	0	0	0	0	6.1075e-05
104	0.437274	10.488	10.488	0	0	0	0	0	0	0	0	0	0	0	0	0	0	0	0	0	0	0	0	0	0	0	0	0	0	0	6.08522e-05	0	0
55	0.437274	36.63	36.63	0	0	0	0	0	0	0	0	0	0	0	0	0	0	0	0	0	0	0	0	0	0	0	0	0	0	0	0	0	6.08471e-05
136	0.437274	23.279	23.279	0	0	0	0	0	0	0	0	0	0	0	0	0	0	0	0	0	0	0	0	0	0	0	0	0	0	0	0	0	6.04199e-05
56	0.437274	12.029	12.029	0	0	0	0	0	0	0	0	0	0	0	0	0	0	0	0	0	0	0	0	0	0	0	0	0	0	0	0	0	6.04057e-05
83	0.437274	23.509	23.509	0	0	0	0	0	0	0	0	0	0	0	0	0	0	0	0	0	0	0	0	0	0	0	0	0	0	0	0	0	6.03772e-05
55	0.437274	6.395	6.395	0	0	0	0	0	0	0	0	0	0	0	0	0	0	0	0	0	0	0	0	0	0	0	0	0	0	0	0	0	5.95513e-05
57	0.437274	16.032	16.032	0	0	0	0	0	0	0	0	0	0	0	0	0	0	0	0	0	0	0	0	0	0	0	0	0	0	0	0	0	5.92095e-05
58	0.437274	11.234	11.234	0	0	0	0	0	0	0	0	0	0	0	0	0	0	0	0	0	0	0	0	0	0	0	0	0	0	0	0	0	5.86257e-05
154	0.437274	20.156	20.156	0	0	0	0	0	0	0	0	0	0	0	0	0	0	0	0	0	0	0	0	0	0	0	0	0	0	0	0	0	5.85972e-05
70	0.437274	6.395	6.395	0	0	0	0	0	0	0	0	0	0	0	0	0	0	0	0	0	0	0	0	0	0	0	0	0	0	0	0	0	5.84975e-05
72	0.437274	19.586	19.586	0	0	0	0	0	0	0	0	0	0	0	0	0	0	0	0	0	0	0	0	0	0	0	0	0	0	0	5.8113e-05	0	0
78	0.437274	17.968	17.968	0	0	0	0	0	0	0	0	0	0	0	0	0	0	0	0	0	0	0	0	0	0	0	0	0	0	0	0	0	5.79564e-05
58	0.437274	12.029	12.029	0	0	0	0	0	0	0	0	0	0	0	0	0	0	0	0	0	0	0	0	0	0	0	0	0	0	0	0	0	5.74153e-05
120	0.437274	26.993	26.993	0	0	0	0	0	0	0	0	0	0	0	0	0	0	0	0	0	0	0	0	0	0	0	0	0	0	0	0	0	5.72871e-05
84	0.437274	17.229	17.229	0	0	0	0	0	0	0	0	0	0	0	0	0	0	0	0	0	0	0	0	0	0	0	0	0	0	0	0	0	5.72017e-05
149	0.437274	28.349	28.349	0	0	0	0	0	0	0	0	0	0	0	0	0	0	0	0	0	0	0	0	0	0	0	0	0	0	0	0	0	5.70308e-05
51	0.437274	8.421	8.421	0	0	0	0	0	0	0	0	0	0	0	0	0	0	0	0	0	0	0	0	0	0	0	0	0	0	0	0	0	5.69454e-05
99	0.437274	9.254	9.254	0	0	0	0	0	0	0	0	0	0	0	0	0	0	0	0	0	0	0	0	0	0	0	0	0	0	0	0	0	5.65609e-05
83	0.437274	20.637	20.637	0	0	0	0	0	0	0	0	0	0	0	0	0	0	0	0	0	0	0	0	0	0	0	0	0	0	0	0	0	5.61764e-05
114	0.437274	22.922	22.922	0	0	0	0	0	0	0	0	0	0	0	0	0	0	0	0	0	0	0	0	0	0	0	0	0	0	0	0	0	5.59201e-05
100	0.437274	12.133	12.133	0	0	0	0	0	0	0	0	0	0	0	0	0	0	0	0	0	0	0	0	0	0	0	0	0	0	0	0	5.57628e-05	0
144	0.437274	8.274	8.274	0	0	0	0	0	0	0	0	0	0	0	0	0	0	0	0	0	0	0	0	0	0	0	0	0	0	0	0	5.55737e-05	0
85	0.437274	8.274	8.274	0	0	0	0	0	0	0	0	0	0	0	0	0	0	0	0	0	0	0	0	0	0	0	0	0	0	0	0	5.55393e-05	0
95	0.437274	19.586	19.586	0	0	0	0	0	0	0	0	0	0	0	0	0	0	0	0	0	0	0	0	0	0	0	0	0	0	0	5.54853e-05	0	0
69	0.437274	18.831	18.831	0	0	0	0	0	0	0	0	0	0	0	0	0	0	0	0	0	0	0	0	0	0	0	0	0	0	0	0	0	5.5322e-05
105	0.437274	30.534	30.534	0	0	0	0	0	0	0	0	0	0	0	0	0	0	0	0	0	0	0	0	0	0	0	0	0	0	0	0	5.52643e-05	0
267	0.437274	13.258	13.258	0	0	0	0	0	0	0	0	0	0	0	0	0	0	0	0	0	0	0	0	0	0	0	0	0	0	0	0	0	5.50372e-05
72	0.437274	9.254	9.254	0	0	0	0	0	0	0	0	0	0	0	0	0	0	0	0	0	0	0	0	0	0	0	0	0	0	0	0	0	5.4966e-05
102	0.437274	37.354	37.354	0	0	0	0	0	0	0	0	0	0	0	0	0	0	0	0	0	0	0	0	0	0	0	0	0	0	0	0	0	5.49376e-05
56	0.437274	8.682	8.682	0	0	0	0	0	0	0	0	0	0	0	0	0	0	0	0	0	0	0	0	0	0	0	0	0	0	0	0	0	5.47952e-05
55	0.437274	12.59	12.59	0	0	0	0	0	0	0	0	0	0	0	0	0	0	0	0	0	0	0	0	0	0	0	0	0	0	0	0	5.4783e-05	0
53	0.437274	2.731	2.731	0	0	0	0	0	0	0	0	0	0	0	0	0	0	0	0	0	0	0	0	0	0	0	0	0	0	0	5.46412e-05	0	0
96	0.437274	17.698	17.698	0	0	0	0	0	0	0	0	0	0	0	0	0	0	0	0	0	0	0	0	0	0	0	0	0	0	0	0	0	5.42113e-05
75	0.437274	30.51	30.534	0	0	0	0	0	0	0	0	0	0	0	0	0	0	0	0	0	0	0	0	0	0	0	0	0	0	0	0	5.4147e-05	0
75	0.437274	10.488	10.488	0	0	0	0	0	0	0	0	0	0	0	0	0	0	0	0	0	0	0	0	0	0	0	0	0	0	0	5.39405e-05	0	0
79	0.437274	18.566	18.566	0	0	0	0	0	0	0	0	0	0	0	0	0	0	0	0	0	0	0	0	0	0	0	0	0	0	0	0	0	5.34709e-05
55	0.437274	5.2	5.2	0	0	0	0	0	0	0	0	0	0	0	0	0	0	0	0	0	0	0	0	0	0	0	0	0	0	0	5.33034e-05	0	0
75	0.437274	5.2	5.2	0	0	0	0	0	0	0	0	0	0	0	0	0	0	0	0	0	0	0	0	0	0	0	0	0	0	0	5.32238e-05	0	0
73	0.437274	28.133	28.173	0	0	0	0	0	0	0	0	0	0	0	0	0	0	0	0	0	0	0	0	0	0	0	0	0	0	0	5.32238e-05	0	0
85	0.437274	20.156	20.156	0	0	0	0	0	0	0	0	0	0	0	0	0	0	0	0	0	0	0	0	0	0	0	0	0	0	0	0	0	5.30437e-05
74	0.437274	6.783	6.783	0	0	0	0	0	0	0	0	0	0	0	0	0	0	0	0	0	0	0	0	0	0	0	0	0	0	0	0	5.27546e-05	0
113	0.437274	17.009	17.009	0	0	0	0	0	0	0	0	0	0	0	0	0	0	0	0	0	0	0	0	0	0	0	0	0	0	0	0	0	5.26877e-05
58	0.437274	11.806	11.806	0	0	0	0	0	0	0	0	0	0	0	0	0	0	0	0	0	0	0	0	0	0	0	0	0	0	0	0	0	5.24029e-05
67	0.437274	5.439	5.439	0	0	0	0	0	0	0	0	0	0	0	0	0	0	0	0	0	0	0	0	0	0	0	0	0	0	0	5.22683e-05	0	0
55	0.437274	19.126	19.126	0	0	0	0	0	0	0	0	0	0	0	0	0	0	0	0	0	0	0	0	0	0	0	0	0	0	0	0	0	5.21608e-05
53	0.437274	17.623	17.623	0	0	0	0	0	0	0	0	0	0	0	0	0	0	0	0	0	0	0	0	0	0	0	0	0	0	0	0	0	5.21465e-05
76	0.437274	10.113	10.113	0	0	0	0	0	0	0	0	0	0	0	0	0	0	0	0	0	0	0	0	0	0	0	0	0	0	0	5.18542e-05	0	0
140	0.437274	39.102	39.102	0	0	0	0	0	0	0	0	0	0	0	0	0	0	0	0	0	0	0	0	0	0	0	0	0	0	0	0	0	5.18475e-05
128	0.437274	6.849	6.849	0	0	0	0	0	0	0	0	0	0	0	0	0	0	0	0	0	0	0	0	0	0	0	0	0	0	0	0	0	5.17051e-05
112	0.437274	14.572	14.572	0	0	0	0	0	0	0	0	0	0	0	0	0	0	0	0	0	0	0	0	0	0	0	0	0	0	0	5.15835e-05	0	0
87	0.437274	12.422	12.422	0	0	0	0	0	0	0	0	0	0	0	0	0	0	0	0	0	0	0	0	0	0	0	0	0	0	0	0	0	5.14345e-05
60	0.437274	23.655	23.87	0	0	0	0	0	0	0	0	0	0	0	0	0	0	0	0	0	0	0	0	0	0	0	0	0	0	0	5.13924e-05	0	0
57	0.437274	20.362	20.362	0	0	0	0	0	0	0	0	0	0	0	0	0	0	0	0	0	0	0	0	0	0	0	0	0	0	0	0	0	5.13491e-05
99	0.437274	27.154	27.154	0	0	0	0	0	0	0	0	0	0	0	0	0	0	0	0	0	0	0	0	0	0	0	0	0	0	0	0	0	5.13064e-05
131	0.437274	18.517	18.517	0	0	0	0	0	0	0	0	0	0	0	0	0	0	0	0	0	0	0	0	0	0	0	0	0	0	0	0	5.12763e-05	0
58	0.437274	15.655	15.655	0	0	0	0	0	0	0	0	0	0	0	0	0	0	0	0	0	0	0	0	0	0	0	0	0	0	0	0	5.10357e-05	0
111	0.437274	26.403	26.403	0	0	0	0	0	0	0	0	0	0	0	0	0	0	0	0	0	0	0	0	0	0	0	0	0	0	0	0	0	5.09504e-05
60	0.437274	28.133	28.173	0	0	0	0	0	0	0	0	0	0	0	0	0	0	0	0	0	0	0	0	0	0	0	0	0	0	0	5.09464e-05	0	0
69	0.437274	7.518	7.518	0	0	0	0	0	0	0	0	0	0	0	0	0	0	0	0	0	0	0	0	0	0	0	0	0	0	0	5.07075e-05	0	0
111	0.437274	14.13	14.13	0	0	0	0	0	0	0	0	0	0	0	0	0	0	0	0	0	0	0	0	0	0	0	0	0	0	0	0	0	5.06656e-05
135	0.437274	25.549	25.549	0	0	0	0	0	0	0	0	0	0	0	0	0	0	0	0	0	0	0	0	0	0	0	0	0	0	0	0	5.06403e-05	0
85	0.437274	23.014	23.014	0	0	0	0	0	0	0	0	0	0	0	0	0	0	0	0	0	0	0	0	0	0	0	0	0	0	0	0	0	5.04805e-05
101	0.437274	22.922	22.922	0	0	0	0	0	0	0	0	0	0	0	0	0	0	0	0	0	0	0	0	0	0	0	0	0	0	0	0	0	5.04093e-05
52	0.437274	10.33	10.33	0	0	0	0	0	0	0	0	0	0	0	0	0	0	0	0	0	0	0	0	0	0	0	0	0	0	0	5.03253e-05	0	0
59	0.437274	7.38	7.38	0	0	0	0	0	0	0	0	0	0	0	0	0	0	0	0	0	0	0	0	0	0	0	0	0	0	0	5.02935e-05	0	0
75	0.437274	8.341	8.341	0	0	0	0	0	0	0	0	0	0	0	0	0	0	0	0	0	0	0	0	0	0	0	0	0	0	0	0	0	5.0096e-05
69	0.437274	9.921	9.921	0	0	0	0	0	0	0	0	0	0	0	0	0	0	0	0	0	0	0	0	0	0	0	0	0	0	0	5.00387e-05	0	0
77	0.437274	23.279	23.279	0	0	0	0	0	0	0	0	0	0	0	0	0	0	0	0	0	0	0	0	0	0	0	0	0	0	0	0	0	5.00106e-05
74	0.437274	6.99	6.99	0	0	0	0	0	0	0	0	0	0	0	0	0	0	0	0	0	0	0	0	0	0	0	0	0	0	0	5.00068e-05	0	0
68	0.437274	13.662	13.662	0	0	0	0	0	0	0	0	0	0	0	0	0	0	0	0	0	0	0	0	0	0	0	0	0	0	0	0	0	4.99251e-05
59	0.437274	29.102	29.102	0	0	0	0	0	0	0	0	0	0	0	0	0	0	0	0	0	0	0	0	0	0	0	0	0	0	0	0	0	4.98966e-05
56	0.437274	9.59	9.59	0	0	0	0	0	0	0	0	0	0	0	0	0	0	0	0	0	0	0	0	0	0	0	0	0	0	0	4.98953e-05	0	0
79	0.437274	23.279	23.279	0	0	0	0	0	0	0	0	0	0	0	0	0	0	0	0	0	0	0	0	0	0	0	0	0	0	0	0	0	4.98112e-05
69	0.437274	16.642	16.642	0	0	0	0	0	0	0	0	0	0	0	0	0	0	0	0	0	0	0	0	0	0	0	0	0	0	0	0	0	4.97827e-05
71	0.437274	10.133	10.133	0	0	0	0	0	0	0	0	0	0	0	0	0	0	0	0	0	0	0	0	0	0	0	0	0	0	0	4.97361e-05	0	0
105	0.437274	13.531	13.531	0	0	0	0	0	0	0	0	0	0	0	0	0	0	0	0	0	0	0	0	0	0	0	0	0	0	0	0	0	4.96973e-05
64	0.437274	3.754	3.754	0	0	0	0	0	0	0	0	0	0	0	0	0	0	0	0	0	0	0	0	0	0	0	0	0	0	0	0	4.95574e-05	0
81	0.437274	18.306	18.306	0	0	0	0	0	0	0	0	0	0	0	0	0	0	0	0	0	0	0	0	0	0	0	0	0	0	0	0	0	4.95264e-05
97	0.437274	18.566	18.566	0	0	0	0	0	0	0	0	0	0	0	0	0	0	0	0	0	0	0	0	0	0	0	0	0	0	0	0	0	4.94125e-05
103	0.437274	10.113	10.113	0	0	0	0	0	0	0	0	0	0	0	0	0	0	0	0	0	0	0	0	0	0	0	0	0	0	0	4.93539e-05	0	0
73	0.437274	4.57	4.57	0	0	0	0	0	0	0	0	0	0	0	0	0	0	0	0	0	0	0	0	0	0	0	0	0	0	0	4.92902e-05	0	0
110	0.437274	17.698	17.698	0	0	0	0	0	0	0	0	0	0	0	0	0	0	0	0	0	0	0	0	0	0	0	0	0	0	0	0	0	4.92558e-05
66	0.437274	10.33	10.33	0	0	0	0	0	0	0	0	0	0	0	0	0	0	0	0	0	0	0	0	0	0	0	0	0	0	0	4.89716e-05	0	0
71	0.437274	27.154	27.154	0	0	0	0	0	0	0	0	0	0	0	0	0	0	0	0	0	0	0	0	0	0	0	0	0	0	0	0	0	4.87147e-05
82	0.437274	16.306	16.306	0	0	0	0	0	0	0	0	0	0	0	0	0	0	0	0	0	0	0	0	0	0	0	0	0	0	0	4.85894e-05	0	0
60	0.437274	21.154	21.154	0	0	0	0	0	0	0	0	0	0	0	0	0	0	0	0	0	0	0	0	0	0	0	0	0	0	0	0	4.84401e-05	0
207	0.437274	14.338	14.338	0	0	0	0	0	0	0	0	0	0	0	0	0	0	0	0	0	0	0	0	0	0	0	0	0	0	0	0	4.80275e-05	0
75	0.437274	17.439	17.439	0	0	0	0	0	0	0	0	0	0	0	0	0	0	0	0	0	0	0	0	0	0	0	0	0	0	0	4.79683e-05	0	0
85	0.437274	9.254	9.254	0	0	0	0	0	0	0	0	0	0	0	0	0	0	0	0	0	0	0	0	0	0	0	0	0	0	0	0	0	4.78888e-05
70	0.437274	15.473	15.473	0	0	0	0	0	0	0	0	0	0	0	0	0	0	0	0	0	0	0	0	0	0	0	0	0	0	0	0	0	4.78034e-05
70	0.437274	1.61	1.61	0	0	0	0	0	0	0	0	0	0	0	0	0	0	0	0	0	0	0	0	0	0	0	0	0	0	0	4.77135e-05	0	0
70	0.437274	8.794	8.794	0	0	0	0	0	0	0	0	0	0	0	0	0	0	0	0	0	0	0	0	0	0	0	0	0	0	0	0	0	4.74189e-05
148	0.437274	23.872	23.872	0	0	0	0	0	0	0	0	0	0	0	0	0	0	0	0	0	0	0	0	0	0	0	0	0	0	0	0	4.7254e-05	0
82	0.437274	18.306	18.306	0	0	0	0	0	0	0	0	0	0	0	0	0	0	0	0	0	0	0	0	0	0	0	0	0	0	0	0	0	4.72053e-05
73	0.437274	3.176	3.176	0	0	0	0	0	0	0	0	0	0	0	0	0	0	0	0	0	0	0	0	0	0	0	0	0	0	0	0	0	4.71483e-05
68	0.437274	8.103	8.103	0	0	0	0	0	0	0	0	0	0	0	0	0	0	0	0	0	0	0	0	0	0	0	0	0	0	0	0	0	4.67923e-05
52	0.437274	16.864	16.864	0	0	0	0	0	0	0	0	0	0	0	0	0	0	0	0	0	0	0	0	0	0	0	0	0	0	0	0	0	4.67781e-05
132	0.437274	28.017	28.017	0	0	0	0	0	0	0	0	0	0	0	0	0	0	0	0	0	0	0	0	0	0	0	0	0	0	0	0	0	4.66642e-05
193	0.437274	21.169	21.169	0	0	0	0	0	0	0	0	0	0	0	0	0	0	0	0	0	0	0	0	0	0	0	0	0	0	0	4.66465e-05	0	0
82	0.437274	18.459	18.459	0	0	0	0	0	0	0	0	0	0	0	0	0	0	0	0	0	0	0	0	0	0	0	0	0	0	0	0	0	4.65503e-05
87	0.437274	22.922	22.922	0	0	0	0	0	0	0	0	0	0	0	0	0	0	0	0	0	0	0	0	0	0	0	0	0	0	0	0	0	4.64933e-05
53	0.437274	12.029	12.029	0	0	0	0	0	0	0	0	0	0	0	0	0	0	0	0	0	0	0	0	0	0	0	0	0	0	0	0	0	4.63509e-05
68	0.437274	8.421	8.421	0	0	0	0	0	0	0	0	0	0	0	0	0	0	0	0	0	0	0	0	0	0	0	0	0	0	0	0	0	4.63224e-05
71	0.437274	16.306	16.306	0	0	0	0	0	0	0	0	0	0	0	0	0	0	0	0	0	0	0	0	0	0	0	0	0	0	0	4.6312e-05	0	0
107	0.437274	18.306	18.306	0	0	0	0	0	0	0	0	0	0	0	0	0	0	0	0	0	0	0	0	0	0	0	0	0	0	0	0	0	4.61658e-05
88	0.437274	3.674	3.674	0	0	0	0	0	0	0	0	0	0	0	0	0	0	0	0	0	0	0	0	0	0	0	0	0	0	0	0	0	4.60376e-05
58	0.437274	17.229	17.229	0	0	0	0	0	0	0	0	0	0	0	0	0	0	0	0	0	0	0	0	0	0	0	0	0	0	0	0	0	4.60376e-05
79	0.437274	17.946	17.946	0	0	0	0	0	0	0	0	0	0	0	0	0	0	0	0	0	0	0	0	0	0	0	0	0	0	0	0	0	4.57955e-05
117	0.437274	11.83	11.83	0	0	0	0	0	0	0	0	0	0	0	0	0	0	0	0	0	0	0	0	0	0	0	0	0	0	0	0	0	4.56959e-05
327	0.437274	23.014	23.014	0	0	0	0	0	0	0	0	0	0	0	0	0	0	0	0	0	0	0	0	0	0	0	0	0	0	0	0	0	4.56816e-05
95	0.437274	16.076	16.076	0	0	0	0	0	0	0	0	0	0	0	0	0	0	0	0	0	0	0	0	0	0	0	0	0	0	0	0	0	4.55535e-05
71	0.437274	36.63	36.63	0	0	0	0	0	0	0	0	0	0	0	0	0	0	0	0	0	0	0	0	0	0	0	0	0	0	0	0	0	4.55107e-05
96	0.437274	18.306	18.306	0	0	0	0	0	0	0	0	0	0	0	0	0	0	0	0	0	0	0	0	0	0	0	0	0	0	0	0	0	4.53541e-05
69	0.437274	19.036	19.036	0	0	0	0	0	0	0	0	0	0	0	0	0	0	0	0	0	0	0	0	0	0	0	0	0	0	0	0	0	4.52259e-05
68	0.437274	14.407	14.407	0	0	0	0	0	0	0	0	0	0	0	0	0	0	0	0	0	0	0	0	0	0	0	0	0	0	0	0	0	4.51547e-05
93	0.437274	20.637	20.637	0	0	0	0	0	0	0	0	0	0	0	0	0	0	0	0	0	0	0	0	0	0	0	0	0	0	0	0	0	4.51263e-05
103	0.437274	23.279	23.279	0	0	0	0	0	0	0	0	0	0	0	0	0	0	0	0	0	0	0	0	0	0	0	0	0	0	0	0	0	4.50978e-05
59	0.437274	7.289	7.289	0	0	0	0	0	0	0	0	0	0	0	0	0	0	0	0	0	0	0	0	0	0	0	0	0	0	0	0	0	4.49269e-05
86	0.437274	13.126	13.126	0	0	0	0	0	0	0	0	0	0	0	0	0	0	0	0	0	0	0	0	0	0	0	0	0	0	0	0	0	4.45994e-05
120	0.437274	10.755	10.755	0	0	0	0	0	0	0	0	0	0	0	0	0	0	0	0	0	0	0	0	0	0	0	0	0	0	0	0	0	4.45282e-05
91	0.437274	23.279	23.279	0	0	0	0	0	0	0	0	0	0	0	0	0	0	0	0	0	0	0	0	0	0	0	0	0	0	0	0	0	4.45139e-05
84	0.437274	36.63	36.63	0	0	0	0	0	0	0	0	0	0	0	0	0	0	0	0	0	0	0	0	0	0	0	0	0	0	0	0	0	4.42861e-05
70	0.437274	17.009	17.009	0	0	0	0	0	0	0	0	0	0	0	0	0	0	0	0	0	0	0	0	0	0	0	0	0	0	0	0	0	4.42576e-05
112	0.437274	16.306	16.306	0	0	0	0	0	0	0	0	0	0	0	0	0	0	0	0	0	0	0	0	0	0	0	0	0	0	0	4.42417e-05	0	0
70	0.437274	4.661	4.661	0	0	0	0	0	0	0	0	0	0	0	0	0	0	0	0	0	0	0	0	0	0	0	0	0	0	0	0	0	4.41864e-05
56	0.437274	21.191	21.191	0	0	0	0	0	0	0	0	0	0	0	0	0	0	0	0	0	0	0	0	0	0	0	0	0	0	0	0	0	4.41864e-05
87	0.437274	23.245	23.245	0	0	0	0	0	0	0	0	0	0	0	0	0	0	0	0	0	0	0	0	0	0	0	0	0	0	0	0	0	4.41864e-05
87	0.437274	20.228	20.228	0	0	0	0	0	0	0	0	0	0	0	0	0	0	0	0	0	0	0	0	0	0	0	0	0	0	0	0	0	4.4158e-05
67	0.437274	17.623	17.623	0	0	0	0	0	0	0	0	0	0	0	0	0	0	0	0	0	0	0	0	0	0	0	0	0	0	0	0	0	4.40725e-05
58	0.437274	19.678	19.678	0	0	0	0	0	0	0	0	0	0	0	0	0	0	0	0	0	0	0	0	0	0	0	0	0	0	0	0	0	4.34744e-05
59	0.437274	19.678	19.678	0	0	0	0	0	0	0	0	0	0	0	0	0	0	0	0	0	0	0	0	0	0	0	0	0	0	0	0	0	4.34602e-05
83	0.437274	14.13	14.13	0	0	0	0	0	0	0	0	0	0	0	0	0	0	0	0	0	0	0	0	0	0	0	0	0	0	0	0	0	4.3389e-05
71	0.437274	6.174	6.174	0	0	0	0	0	0	0	0	0	0	0	0	0	0	0	0	0	0	0	0	0	0	0	0	0	0	0	0	0	4.33605e-05
129	0.437274	1.693	1.693	0	0	0	0	0	0	0	0	0	0	0	0	0	0	0	0	0	0	0	0	0	0	0	0	0	0	0	0	4.33348e-05	0
79	0.437274	20.637	20.637	0	0	0	0	0	0	0	0	0	0	0	0	0	0	0	0	0	0	0	0	0	0	0	0	0	0	0	0	0	4.32751e-05
67	0.437274	13.662	13.662	0	0	0	0	0	0	0	0	0	0	0	0	0	0	0	0	0	0	0	0	0	0	0	0	0	0	0	0	0	4.3033e-05
50	0.437274	10.33	10.33	0	0	0	0	0	0	0	0	0	0	0	0	0	0	0	0	0	0	0	0	0	0	0	0	0	0	0	4.30313e-05	0	0
65	0.437274	17.698	17.698	0	0	0	0	0	0	0	0	0	0	0	0	0	0	0	0	0	0	0	0	0	0	0	0	0	0	0	0	0	4.29618e-05
70	0.437274	15.103	15.103	0	0	0	0	0	0	0	0	0	0	0	0	0	0	0	0	0	0	0	0	0	0	0	0	0	0	0	0	0	4.29476e-05
57	0.437274	28.017	28.017	0	0	0	0	0	0	0	0	0	0	0	0	0	0	0	0	0	0	0	0	0	0	0	0	0	0	0	0	0	4.29048e-05
68	0.437274	14.13	14.13	0	0	0	0	0	0	0	0	0	0	0	0	0	0	0	0	0	0	0	0	0	0	0	0	0	0	0	0	0	4.25204e-05
125	0.437274	20.742	20.742	0	0	0	0	0	0	0	0	0	0	0	0	0	0	0	0	0	0	0	0	0	0	0	0	0	0	0	0	4.24581e-05	0
55	0.437274	7.823	7.823	0	0	0	0	0	0	0	0	0	0	0	0	0	0	0	0	0	0	0	0	0	0	0	0	0	0	0	0	0	4.24349e-05
224	0.437274	23.014	23.014	0	0	0	0	0	0	0	0	0	0	0	0	0	0	0	0	0	0	0	0	0	0	0	0	0	0	0	0	0	4.22356e-05
77	0.437274	19.873	19.873	0	0	0	0	0	0	0	0	0	0	0	0	0	0	0	0	0	0	0	0	0	0	0	0	0	0	0	0	0	4.22213e-05
114	0.437274	8.341	8.341	0	0	0	0	0	0	0	0	0	0	0	0	0	0	0	0	0	0	0	0	0	0	0	0	0	0	0	0	0	4.20932e-05
133	0.437274	19.368	19.368	0	0	0	0	0	0	0	0	0	0	0	0	0	0	0	0	0	0	0	0	0	0	0	0	0	0	0	4.20599e-05	0	0
77	0.437274	16.864	16.864	0	0	0	0	0	0	0	0	0	0	0	0	0	0	0	0	0	0	0	0	0	0	0	0	0	0	0	0	0	4.20077e-05
95	0.437274	19.368	19.368	0	0	0	0	0	0	0	0	0	0	0	0	0	0	0	0	0	0	0	0	0	0	0	0	0	0	0	4.19006e-05	0	0
85	0.437274	11.213	11.213	0	0	0	0	0	0	0	0	0	0	0	0	0	0	0	0	0	0	0	0	0	0	0	0	0	0	0	0	4.16158e-05	0
71	0.437274	4.351	4.351	0	0	0	0	0	0	0	0	0	0	0	0	0	0	0	0	0	0	0	0	0	0	0	0	0	0	0	0	0	4.13812e-05
69	0.437274	22.379	22.379	0	0	0	0	0	0	0	0	0	0	0	0	0	0	0	0	0	0	0	0	0	0	0	0	0	0	0	0	0	4.13527e-05
54	0.437274	8.103	8.103	0	0	0	0	0	0	0	0	0	0	0	0	0	0	0	0	0	0	0	0	0	0	0	0	0	0	0	0	0	4.12388e-05
105	0.437274	12.986	12.986	0	0	0	0	0	0	0	0	0	0	0	0	0	0	0	0	0	0	0	0	0	0	0	0	0	0	0	0	0	4.09967e-05
94	0.437274	22.126	22.126	0	0	0	0	0	0	0	0	0	0	0	0	0	0	0	0	0	0	0	0	0	0	0	0	0	0	0	0	0	4.0954e-05
81	0.437274	17.412	17.412	0	0	0	0	0	0	0	0	0	0	0	0	0	0	0	0	0	0	0	0	0	0	0	0	0	0	0	0	0	4.08828e-05
143	0.437274	40.116	40.116	0	0	0	0	0	0	0	0	0	0	0	0	0	0	0	0	0	0	0	0	0	0	0	0	0	0	0	0	0	4.05695e-05
84	0.437274	7.101	7.101	0	0	0	0	0	0	0	0	0	0	0	0	0	0	0	0	0	0	0	0	0	0	0	0	0	0	0	0	4.04469e-05	0
71	0.437274	23.306	23.306	0	0	0	0	0	0	0	0	0	0	0	0	0	0	0	0	0	0	0	0	0	0	0	0	0	0	0	0	0	4.02277e-05
119	0.437274	23.014	23.014	0	0	0	0	0	0	0	0	0	0	0	0	0	0	0	0	0	0	0	0	0	0	0	0	0	0	0	0	0	4.01565e-05
189	0.437274	23.014	23.014	0	0	0	0	0	0	0	0	0	0	0	0	0	0	0	0	0	0	0	0	0	0	0	0	0	0	0	0	0	3.97009e-05
147	0.437274	23.014	23.014	0	0	0	0	0	0	0	0	0	0	0	0	0	0	0	0	0	0	0	0	0	0	0	0	0	0	0	0	0	3.95585e-05
98	0.437274	1.692	1.692	0	0	0	0	0	0	0	0	0	0	0	0	0	0	0	0	0	0	0	0	0	0	0	0	0	0	0	0	0	3.953e-05
193	0.437274	19.368	19.368	0	0	0	0	0	0	0	0	0	0	0	0	0	0	0	0	0	0	0	0	0	0	0	0	0	0	0	3.91455e-05	0	0
235	0.437274	15.146	15.146	0	0	0	0	0	0	0	0	0	0	0	0	0	0	0	0	0	0	0	0	0	0	0	0	0	0	0	0	0	3.86471e-05
65	0.437274	20.077	20.077	0	0	0	0	0	0	0	0	0	0	0	0	0	0	0	0	0	0	0	0	0	0	0	0	0	0	0	3.79192e-05	0	0
146	0.437274	14.726	14.726	0	0	0	0	0	0	0	0	0	0	0	0	0	0	0	0	0	0	0	0	0	0	0	0	0	0	0	3.79033e-05	0	0
75	0.437274	8.415	8.415	0	0	0	0	0	0	0	0	0	0	0	0	0	0	0	0	0	0	0	0	0	0	0	0	0	0	0	3.78714e-05	0	0
112	0.437274	11.318	11.318	0	0	0	0	0	0	0	0	0	0	0	0	0	0	0	0	0	0	0	0	0	0	0	0	0	0	0	0	3.69575e-05	0
60	0.437274	20.101	20.101	0	0	0	0	0	0	0	0	0	0	0	0	0	0	0	0	0	0	0	0	0	0	0	0	0	0	0	0	0	3.69383e-05
118	0.437274	10.488	10.488	0	0	0	0	0	0	0	0	0	0	0	0	0	0	0	0	0	0	0	0	0	0	0	0	0	0	0	3.64381e-05	0	0
67	0.437274	10.488	10.488	0	0	0	0	0	0	0	0	0	0	0	0	0	0	0	0	0	0	0	0	0	0	0	0	0	0	0	3.63585e-05	0	0
102	0.437274	21.685	21.685	0	0	0	0	0	0	0	0	0	0	0	0	0	0	0	0	0	0	0	0	0	0	0	0	0	0	0	3.63585e-05	0	0
188	0.437274	23.014	23.014	0	0	0	0	0	0	0	0	0	0	0	0	0	0	0	0	0	0	0	0	0	0	0	0	0	0	0	0	0	3.6269e-05
74	0.437274	3.286	3.286	0	0	0	0	0	0	0	0	0	0	0	0	0	0	0	0	0	0	0	0	0	0	0	0	0	0	0	3.61992e-05	0	0
209	0.437274	23.014	23.014	0	0	0	0	0	0	0	0	0	0	0	0	0	0	0	0	0	0	0	0	0	0	0	0	0	0	0	0	0	3.55855e-05
150	0.437274	28.05	28.05	0	0	0	0	0	0	0	0	0	0	0	0	0	0	0	0	0	0	0	0	0	0	0	0	0	0	0	0	0	3.51299e-05
52	0.437274	10.552	10.552	0	0	0	0	0	0	0	0	0	0	0	0	0	0	0	0	0	0	0	0	0	0	0	0	0	0	0	3.48296e-05	0	0
309	0.437274	23.006	23.006	0	0	0	0	0	0	0	0	0	0	0	0	0	0	0	0	0	0	0	0	0	0	0	0	0	0	0	0	3.47056e-05	0
147	0.437274	14.726	14.726	0	0	0	0	0	0	0	0	0	0	0	0	0	0	0	0	0	0	0	0	0	0	0	0	0	0	0	3.44951e-05	0	0
87	0.437274	14.264	14.264	0	0	0	0	0	0	0	0	0	0	0	0	0	0	0	0	0	0	0	0	0	0	0	0	0	0	0	0	3.44306e-05	0
81	0.437274	17.946	17.946	0	0	0	0	0	0	0	0	0	0	0	0	0	0	0	0	0	0	0	0	0	0	0	0	0	0	0	0	0	3.36204e-05
129	0.437274	21.455	21.455	0	0	0	0	0	0	0	0	0	0	0	0	0	0	0	0	0	0	0	0	0	0	0	0	0	0	0	0	3.35024e-05	0
162	0.437274	15.121	15.121	0	0	0	0	0	0	0	0	0	0	0	0	0	0	0	0	0	0	0	0	0	0	0	0	0	0	0	0	0	3.28657e-05
79	0.437274	19.873	19.873	0	0	0	0	0	0	0	0	0	0	0	0	0	0	0	0	0	0	0	0	0	0	0	0	0	0	0	0	0	3.19401e-05
325	0.437274	27.643	27.643	0	0	0	0	0	0	0	0	0	0	0	0	0	0	0	0	0	0	0	0	0	0	0	0	0	0	0	3.16444e-05	0	0
104	0.437274	10.78	10.78	0	0	0	0	0	0	0	0	0	0	0	0	0	0	0	0	0	0	0	0	0	0	0	0	0	0	0	0	3.1474e-05	0
78	0.437274	2.059	2.059	0	0	0	0	0	0	0	0	0	0	0	0	0	0	0	0	0	0	0	0	0	0	0	0	0	0	0	3.10393e-05	0	0
85	0.437274	5.046	5.046	0	0	0	0	0	0	0	0	0	0	0	0	0	0	0	0	0	0	0	0	0	0	0	0	0	0	0	0	0	3.02456e-05
50	0.437274	5.371	5.371	0	0	0	0	0	0	0	0	0	0	0	0	0	0	0	0	0	0	0	0	0	0	0	0	0	0	0	2.97811e-05	0	0
142	0.437274	11.378	11.378	0	0	0	0	0	0	0	0	0	0	0	0	0	0	0	0	0	0	0	0	0	0	0	0	0	0	0	0	0	2.9619e-05
65	0.437274	7.778	7.778	0	0	0	0	0	0	0	0	0	0	0	0	0	0	0	0	0	0	0	0	0	0	0	0	0	0	0	0	0	2.92915e-05
119	0.437274	28.017	28.017	0	0	0	0	0	0	0	0	0	0	0	0	0	0	0	0	0	0	0	0	0	0	0	0	0	0	0	0	0	2.89925e-05
62	0.437274	16.193	16.193	0	0	0	0	0	0	0	0	0	0	0	0	0	0	0	0	0	0	0	0	0	0	0	0	0	0	0	0	0	2.8551e-05
234	0.437274	15.121	15.121	0	0	0	0	0	0	0	0	0	0	0	0	0	0	0	0	0	0	0	0	0	0	0	0	0	0	0	0	0	2.83801e-05
50	0.437274	16.199	16.199	0	0	0	0	0	0	0	0	0	0	0	0	0	0	0	0	0	0	0	0	0	0	0	0	0	0	0	2.77745e-05	0	0
104	0.437274	22.955	22.955	0	0	0	0	0	0	0	0	0	0	0	0	0	0	0	0	0	0	0	0	0	0	0	0	0	0	0	0	2.7211e-05	0
133	0.437274	26.102	26.102	0	0	0	0	0	0	0	0	0	0	0	0	0	0	0	0	0	0	0	0	0	0	0	0	0	0	0	2.66597e-05	0	0
76	0.437274	18.562	18.562	0	0	0	0	0	0	0	0	0	0	0	0	0	0	0	0	0	0	0	0	0	0	0	0	0	0	0	2.60704e-05	0	0
76	0.437274	10.466	10.466	0	0	0	0	0	0	0	0	0	0	0	0	0	0	0	0	0	0	0	0	0	0	0	0	0	0	0	0	0	2.52474e-05
104	0.437274	17.252	17.252	0	0	0	0	0	0	0	0	0	0	0	0	0	0	0	0	0	0	0	0	0	0	0	0	0	0	0	2.50193e-05	0	0
134	0.437274	25.546	25.546	0	0	0	0	0	0	0	0	0	0	0	0	0	0	0	0	0	0	0	0	0	0	0	0	0	0	0	0	0	2.4635e-05
60	0.437274	12.868	12.868	0	0	0	0	0	0	0	0	0	0	0	0	0	0	0	0	0	0	0	0	0	0	0	0	0	0	0	0	0	2.42506e-05
104	0.437274	18.517	18.517	0	0	0	0	0	0	0	0	0	0	0	0	0	0	0	0	0	0	0	0	0	0	0	0	0	0	0	0	2.42028e-05	0
132	0.437274	19.368	19.368	0	0	0	0	0	0	0	0	0	0	0	0	0	0	0	0	0	0	0	0	0	0	0	0	0	0	0	2.40319e-05	0	0
64	0.437274	13.767	13.767	0	0	0	0	0	0	0	0	0	0	0	0	0	0	0	0	0	0	0	0	0	0	0	0	0	0	0	0	2.3309e-05	0
84	0.437274	24.383	24.383	0	0	0	0	0	0	0	0	0	0	0	0	0	0	0	0	0	0	0	0	0	0	0	0	0	0	0	0	0	2.24706e-05
94	0.437274	24.692	24.692	0	0	0	0	0	0	0	0	0	0	0	0	0	0	0	0	0	0	0	0	0	0	0	0	0	0	0	0	2.18651e-05	0
103	0.437274	21.685	21.685	0	0	0	0	0	0	0	0	0	0	0	0	0	0	0	0	0	0	0	0	0	0	0	0	0	0	0	2.18183e-05	0	0
105	0.437274	13.84	13.84	0	0	0	0	0	0	0	0	0	0	0	0	0	0	0	0	0	0	0	0	0	0	0	0	0	0	0	2.12768e-05	0	0
68	0.437274	19.564	19.564	0	0	0	0	0	0	0	0	0	0	0	0	0	0	0	0	0	0	0	0	0	0	0	0	0	0	0	0	0	2.05339e-05
81	0.437274	21.247	21.247	0	0	0	0	0	0	0	0	0	0	0	0	0	0	0	0	0	0	0	0	0	0	0	0	0	0	0	2.0162e-05	0	0
331	0.437274	38.126	38.126	0	0	0	0	0	0	0	0	0	0	0	0	0	0	0	0	0	0	0	0	0	0	0	0	0	0	0	0	0	1.98077e-05
97	0.437274	19.368	19.368	0	0	0	0	0	0	0	0	0	0	0	0	0	0	0	0	0	0	0	0	0	0	0	0	0	0	0	1.97798e-05	0	0
56	0.437274	13.082	13.082	0	0	0	0	0	0	0	0	0	0	0	0	0	0	0	0	0	0	0	0	0	0	0	0	0	0	0	1.93338e-05	0	0
101	0.437274	9.149	9.149	0	0	0	0	0	0	0	0	0	0	0	0	0	0	0	0	0	0	0	0	0	0	0	0	0	0	0	0	0	1.9053e-05
202	0.437274	15.146	15.146	0	0	0	0	0	0	0	0	0	0	0	0	0	0	0	0	0	0	0	0	0	0	0	0	0	0	0	0	0	1.89391e-05
80	0.437274	2.029	2.029	0	0	0	0	0	0	0	0	0	0	0	0	0	0	0	0	0	0	0	0	0	0	0	0	0	0	0	1.77094e-05	0	0
76	0.437274	14.267	14.267	0	0	0	0	0	0	0	0	0	0	0	0	0	0	0	0	0	0	0	0	0	0	0	0	0	0	0	0	0	1.75578e-05
74	0.437274	28.017	28.017	0	0	0	0	0	0	0	0	0	0	0	0	0	0	0	0	0	0	0	0	0	0	0	0	0	0	0	0	0	1.54645e-05
86	0.437274	7.394	7.394	0	0	0	0	0	0	0	0	0	0	0	0	0	0	0	0	0	0	0	0	0	0	0	0	0	0	0	0	0	1.47241e-05
341	0.472667	22.99	23.031	0.00138793	0	0	0.000514359	0	0.00113413	0.000958421	0.000520006	0.000595842	0.00109565	0.00165309	0.000546401	0.000423699	0.000493679	0.000616703	0	0.000920978	0.0010091	0.000686058	0	0.000485992	0.00074355	0.000823102	0.00119882	0.00216853	0.00213339	0	0.000102164	0.000131861	0.000244827
267	0.484209	15.103	15.146	0.000870326	0.00162871	0	0.000525057	0.000484985	0.00109024	0.000567097	0.000230743	0.0003935	0.00075041	0.00147247	0.00056725	0.00045656	0	0.000352636	0	0.00122076	0.000591542	0.000597385	0	0.000949395	0.000566611	0.000903848	0.000745824	0.00205901	0.00108815	0	3.57374e-05	5.99055e-05	0.000193022
176	0.499396	22.981	23.039	0.00180596	0	0	0.000580116	0.0003009	0.0008039	0.000543756	0.000403601	0.000747781	0.000453326	0.000833287	0.000908751	0.000437116	0.0003847	0.000225849	0	0.000718357	0.000444369	0.000503432	0	0.000570952	0.000629247	0.000351309	0.000397274	0.00204771	0.00235118	0	3.77121e-05	0.000203094	0.000242805
60	0.505467	1.748	2.022	0	0	0	0	0	0	0	0	0	0	0	0	0.0177604	0	0	0	0	0	0	0	0.057612	0	0	0	0	0	0	0	0	0
78	0.505467	3.203	3.207	0	0	0	0	0.0101946	0	0	0	0	0.0307825	0	0	0	0	0	0	0	0	0	0	0	0	0	0	0	0	0	0	0	0
57	0.505467	1.874	2.044	0	0	0	0	0	0	0	0	0	0	0	0	0	0	0	0	0.0209974	0	0	0	0	0	0	0.0163792	0	0	0	0	0	0
79	0.505467	3.203	3.207	0	0	0	0	0.00932078	0	0	0	0	0.0187401	0	0	0	0	0	0	0	0	0	0	0	0	0	0	0	0	0	0	0	0
267	0.505467	44.542	44.621	0	0	0	0	0.00686447	0	0	0	0	0	0	0	0	0	0	0	0	0.0138507	0	0	0	0	0	0	0	0	0	0	0	0
190	0.505467	30.901	31.003	0	0	0	0	0	0	0	0	0	0.00411773	0	0	0	0	0	0	0	0	0	0	0	0	0	0	0	0	0.0115994	0	0	0
63	0.505467	2.792	3.125	0	0	0.00822088	0	0	0	0.00472446	0	0	0	0	0	0	0	0	0	0	0	0	0	0	0	0	0	0	0	0	0	0	0
75	0.505467	3.203	3.207	0	0	0	0	0.00432971	0	0	0	0	0.00811618	0	0	0	0	0	0	0	0	0	0	0	0	0	0	0	0	0	0	0	0
61	0.505467	3.203	3.207	0	0	0	0	0.00261715	0	0	0	0	0.00803078	0	0	0	0	0	0	0	0	0	0	0	0	0	0	0	0	0	0	0	0
190	0.505467	22.966	23.063	0	0	0	0	0	0	0	0	0	0	0.00522213	0	0	0	0	0	0	0	0	0	0.0032713	0	0	0	0	0	0	0	0	0
59	0.505467	3.203	3.207	0	0	0	0	0.00313177	0	0	0	0	0.00419389	0	0	0	0	0	0	0	0	0	0	0	0	0	0	0	0	0	0	0	0
325	0.505467	44.542	44.591	0	0	0	0	0.00190086	0	0	0	0	0	0	0	0	0	0	0	0	0.00496108	0	0	0	0	0	0	0	0	0	0	0	0
62	0.505467	3.203	3.207	0	0	0	0	0.00252968	0	0	0	0	0.00425521	0	0	0	0	0	0	0	0	0	0	0	0	0	0	0	0	0	0	0	0
60	0.505467	2.101	2.119	0	0	0	0	0	0	0	0	0	0	0	0	0.000381601	0	0	0	0	0	0	0	0	0	0	0	0.00616798	0	0	0	0	0
116	0.505467	30.912	31.019	0.00332838	0	0	0	0	0	0	0	0	0	0	0	0	0	0	0	0	0.00292291	0	0	0	0	0	0	0	0	0	0	0	0
341	0.505467	44.534	44.611	0	0	0	0	0.00219754	0	0	0	0	0	0	0	0	0	0	0	0	0	0	0	0	0	0.00405252	0	0	0	0	0	0	0
154	0.505467	30.938	31.002	0	0	0	0	0	0	0	0	0	0	0	0	0	0.00140417	0	0	0	0.00482874	0	0	0	0	0	0	0	0	0	0	0	0
58	0.505467	3.203	3.207	0	0	0	0	0.00265013	0	0	0	0	0.00346924	0	0	0	0	0	0	0	0	0	0	0	0	0	0	0	0	0	0	0	0
248	0.505467	15.094	15.158	0	0	0	0	0	0.00487919	0	0	0	0	0	0	0	0	0	0	0	0	0	0	0	0	0	0	0	0	0	0	0	0.000731376
92	0.505467	3.203	3.207	0	0	0	0	0.00166606	0	0	0	0	0.0031996	0	0	0	0	0	0	0	0	0	0	0	0	0	0	0	0	0	0	0	0
60	0.505467	3.203	3.207	0	0	0	0	0.000793876	0	0	0	0	0.00386041	0	0	0	0	0	0	0	0	0	0	0	0	0	0	0	0	0	0	0	0
250	0.505467	44.563	44.609	0	0	0	0	0.0014458	0	0	0	0	0	0	0	0	0	0	0	0	0.00250507	0	0	0	0	0	0	0	0	0	0	0	0
235	0.505467	30.944	30.983	0.0026779	0	0	0	0	0.00106036	0	0	0	0	0	0	0	0	0	0	0	0	0	0	0	0	0	0	0	0	0	0	0	0
126	0.505467	21.131	21.188	0	0	0	0	0	0	0	0	0	0	0	0	0	0	0	0	0	0.00278544	0	0	0	0	0	0	0	0	0	0.00026596	0	0
338	0.505467	22.981	22.983	0	0	0	0	0	0	0	0	0	0.000955372	0	0	0	0	0	0	0	0	0	0	0	0	0	0	0.00176994	0	0	0	0	0
338	0.505467	30.919	31.002	0	0	0	0.000893496	0	0	0	0	0	0	0	0.00174057	0	0	0	0	0	0	0	0	0	0	0	0	0	0	0	0	0	0
309	0.505467	30.929	31.003	0	0	0	0	0	0.00184972	0	0	0	0	0	0	0	0.000724906	0	0	0	0	0	0	0	0	0	0	0	0	0	0	0	0
209	0.505467	44.563	44.591	0	0	0	0	0.000551384	0	0	0	0	0	0	0	0	0	0	0	0	0.00189128	0	0	0	0	0	0	0	0	0	0	0	0
297	0.505467	38.135	38.164	0	0	0	0	0	0	0	0	0	0	0	0	0	0	0	0	0	0.000824565	0	0	0	0	0.00138325	0	0	0	0	0	0	0
132	0.505467	30.902	31.013	0	0	0	0	0	0	0	0	0.000918602	0	0	0	0	0	0	0	0	0	0	0	0	0	0.00127503	0	0	0	0	0	0	0
119	0.505467	38.114	38.161	0	0	0	0	0	0.00111351	0	0	0	0	0	0	0.000899509	0	0	0	0	0	0	0	0	0	0	0	0	0	0	0	0	0
148	0.505467	34.866	34.935	0	0	0	0	0.000892239	0	0	0	0	0	0	0	0	0	0	0	0	0.0011152	0	0	0	0	0	0	0	0	0	0	0	0
282	0.505467	34.874	34.883	0	0	0	0	0.000885701	0	0	0	0	0	0	0	0	0	0	0	0	0.0011095	0	0	0	0	0	0	0	0	0	0	0	0
91	0.505467	3.015	3.048	0	0	0.000681945	0	0	0	0	0	0	0	0	0	0	0	0	0	0	0	0	0	0	0	0	0	0.00123924	0	0	0	0	0
206	0.505467	6.447	6.454	0	0	0	0	0	0	0	0	0	0	0	0.000932236	0	0	0	0	0	0	0	0	0	0.000857565	0	0	0	0	0	0	0	0
87	0.505467	44.563	44.591	0	0	0	0	0.000559229	0	0	0	0	0	0	0	0	0	0	0	0	0.00117567	0	0	0	0	0	0	0	0	0	0	0	0
77	0.505467	3.533	3.543	0	0	0	0	0	0	0	0.000634344	0	0	0	0	0	0	0	0	0	0	0	0	0	0.0010625	0	0	0	0	0	0	0	0
342	0.505467	44.582	44.591	0	0	0	0	0.000396357	0	0	0	0	0	0	0	0	0	0	0	0	0.00113517	0	0	0	0	0	0	0	0	0	0	0	0
135	0.505467	38.135	38.146	0	0	0	0	0	0	0	0	0	0	0	0	0	0	0	0	0	0.000695931	0	0	0	0	0.00082585	0	0	0	0	0	0	0
204	0.505467	38.145	38.154	0	0	0	0	0	0	0	0	0	0	0.000768497	0	0	0	0	0	0	0	0	0	0	0	0	0	0.000748062	0	0	0	0	0
279	0.505467	44.57	44.582	0	0	0	0	0.000475832	0	0	0	0	0	0	0	0	0	0	0	0	0.00103591	0	0	0	0	0	0	0	0	0	0	0	0
139	0.505467	44.539	44.55	0	0	0	0	0	0	0	0.000696522	0	0	0	0	0	0	0	0	0	0	0	0	0.000802906	0	0	0	0	0	0	0	0	0
268	0.505467	21.129	21.174	0	0	0	0	0	0	0	0	0	0	0	0	0	0.00121399	0	0	0	0	0	0	0	0	0	0	0	0	0	0.000242453	0	0
124	0.505467	44.539	44.55	0	0	0	0	0	0	0	0.000624325	0	0	0	0	0	0	0	0	0	0	0	0	0.000795658	0	0	0	0	0	0	0	0	0
72	0.505467	12.509	12.513	0	0	0	0	0	0	0	0	0	0	0	0.000511891	0	0	0	0	0	0	0	0.000824124	0	0	0	0	0	0	0	0	0	0
206	0.505467	14.267	14.267	0	0	0	0	0	0	0	0	0	0.000632808	0	0	0	0	0	0	0	0	0	0	0	0	0	0	0	0.000632439	0	0	0	0
323	0.505467	44.57	44.582	0	0	0	0	0.000361051	0	0	0	0	0	0	0	0	0	0	0	0	0.000896154	0	0	0	0	0	0	0	0	0	0	0	0
269	0.505467	44.559	44.577	0	0	0	0	0	0.000761464	0	0	0	0	0	0	0	0	0	0	0	0	0	0	0	0	0.000470314	0	0	0	0	0	0	0
58	0.505467	1.956	2.044	0	0	0	0	0	0.000376766	0	0	0	0	0	0	0	0	0	0	0.000844255	0	0	0	0	0	0	0	0	0	0	0	0	0
99	0.505467	44.539	44.55	0	0	0	0	0	0	0	0.00053241	0	0	0	0	0	0	0	0	0	0	0	0	0.00060652	0	0	0	0	0	0	0	0	0
62	0.505467	18.69	18.696	0	0	0	0	0	0	0	0	0	0	0.000947002	0	0	0.000188237	0	0	0	0	0	0	0	0	0	0	0	0	0	0	0	0
64	0.505467	16.386	16.423	0	0	0	0	0	0	0	0	0.000241707	0	0	0	0	0	0	0	0	0	0	0	0	0	0	0	0.000853073	0	0	0	0	0
53	0.505467	44.539	44.55	0	0	0	0	0	0	0	0.000457351	0	0	0	0	0	0	0	0	0	0	0	0	0.000554263	0	0	0	0	0	0	0	0	0
221	0.505467	30.967	30.985	0	0	0	0	0	0.000262414	0	0	0.00072454	0	0	0	0	0	0	0	0	0	0	0	0	0	0	0	0	0	0	0	0	0
73	0.505467	11.774	11.813	0	0	0	0	0	0	0	0.000924402	0	0	0	0	0	0	0	0	0	0	0	0	0	0	0	0	0	0	0	3.3874e-05	0	0
179	0.505467	38.131	38.135	0	0	0	0	0.000200213	0	0	0	0	0	0	0	0	0	0	0	0	0.00075326	0	0	0	0	0	0	0	0	0	0	0	0
94	0.505467	6.648	6.693	0	0	0	0	0	0	0	0	0	0	0	0	0	0.00074932	0	0	0	0	0	0	0	0	0	0	0	0	0	0.000124316	0	0
96	0.505467	14.22	14.242	0	0	0	0	0	0	0	0	0	0	0	0	0	0	0	0	0.000789156	0	0	0	0	0	0	0	0	0	0	0	3.30898e-05	0
194	0.505467	38.127	38.164	0	0	0	0	0	0.000391308	0	0	0	0	0	0	0	0	0	0	0	0	0	0	0	0	0.000420429	0	0	0	0	0	0	0
119	0.505467	20.358	20.372	0	0	0	0	0	0	0	0	0	0	0	0	0.00015546	0	0	0.000643028	0	0	0	0	0	0	0	0	0	0	0	0	0	0
177	0.505467	15.132	15.138	0	0	0	0	0	0	0	0	0	0	0	0	0.000166738	0	0	0	0	0	0	0	0	0.000571229	0	0	0	0	0	0	0	0
73	0.505467	16.427	16.444	0	0	0	0	0	0	0.000458013	0	0	0	0	0	0	0	0.00024491	0	0	0	0	0	0	0	0	0	0	0	0	0	0	0
70	0.505467	6.967	6.968	0	0	0	0	0	0.000524167	0	0	0	0	0	0	0	0	0	0	0	0	0	0	0	0	0	0	0	0	0	0	0	4.77179e-05
336	0.505467	30.973	30.983	0	0	0	0	0	0.00027537	0	0	0	0	0	0	0	0.000198851	0	0	0	0	0	0	0	0	0	0	0	0	0	0	0	0
118	0.505467	23.014	23.019	0	0	0	0	0	0.00041127	0	0	0	0	0	0	0	0	0	0	0	0	0	0	0	0	0	0	0	0	0	0	0	5.45246e-05
79	0.505467	3.508	3.514	0	0	0	0.000203547	0	0	0	0	0	0	0	0	0	0	0	0	0	0	0.000255896	0	0	0	0	0	0	0	0	0	0	0
179	0.505467	15.103	15.146	0	0	0	0	0	0.000231348	0	0	0	0	0	0	0	0	0	0	0	0	0	0	0	0	0	0	0	0	0	0	0	0.000119786
235	0.505467	23.001	23.014	0	0	0	0	0	0.000270214	0	0	0	0	0	0	0	0	0	0	0	0	0	0	0	0	0	0	0	0	0	0	0	7.26662e-05
338	0.505467	23.057	23.063	0	0	0	0	0.000283465	0	0	0	0	0	0	0	0	0	0	0	0	0	0	0	0	0	0	0	0	0	0	0	4.14267e-05	0
239	0.505467	30.969	30.977	0	0	0	0	0.000243074	0	0	0	0	0	0	0	0	0	0	0	0	0	0	0	0	0	0	0	0	0	0	0	3.86764e-05	0
60	0.505467	12.501	12.534	0	0	0	0	0	0	0	0	0	0	0	0	0	0.000133924	0	0	0	0	0	0	0	0	0	0	0	0	0	3.43518e-05	0	0
103	0.522457	15.092	15.234	0.00105461	0	0	0	0.000562716	0.000594629	0	0.000614943	0.000485012	0	0	0	0	0.000301196	0	0	0.000712433	0	0	0	0.000528303	0	0.000666472	0.000719049	0	0	0	0.000156136	0.000174439	0.000149149
86	0.525647	1.874	2.044	0	0	0	0	0.00151743	0.00170338	0	0	0	0	0.00293013	0	0.00112293	0	0	0	0.00314626	0	0.00280936	0	0	0	0	0.00327781	0	0	0	0.000482231	0.000859785	0.000444698
325	0.545972	22.981	23.045	0.00449776	0	0	0	0	0.00163107	0	0	0	0	0	0	0	0.00122964	0	0	0	0	0	0	0	0	0	0	0	0.00527836	0	0	0.000331947	0.000408557
234	0.545972	22.987	23.039	0	0	0	0	0	0.000631513	0	0	0	0	0	0	0	0.00050854	0	0	0	0	0	0	0	0	0	0.000778146	0	0.00164164	0	0	8.94543e-05	8.57242e-05
108	0.545972	23.001	23.024	0	0	0	0	0	0.000671965	0	0	0.000430976	0	0	0	0	0.000309423	0	0	0	0	0	0	0	0	0	0	0	0.00123494	0	0	8.28707e-05	0.000108978
263	0.545972	23.006	23.039	0.000753614	0	0	0	0	0.000539238	0	0	0	0	0	0	0	0.000187264	0	0	0	0	0	0	0	0	0	0	0	0.000918056	0	0	5.61066e-05	0.000125923
125	0.566833	22.987	23.025	0.00107724	0	0	0.000356885	0	0.000657159	0	0	0	0	0	0.000713197	0.000326087	0.000590274	0	0	0	0	0	0	0	0	0.000648293	0.000410782	0	0.00260368	0	0	0.000233021	0.00011802
267	0.58257	22.945	23.08	0.241286	0	0	0	0	0	0	0	0	0	0	0	0	0	0	0	0	0	0	0	0	0	0	0	0	0.230578	0	0	0	0.015863
327	0.58257	30.902	31.023	0.0546227	0	0	0	0	0	0	0	0.0266926	0	0	0	0	0	0	0	0	0	0	0	0	0	0.0253348	0	0	0	0	0	0	0
207	0.58257	6.436	6.447	0	0	0.0063098	0	0	0	0	0	0	0	0	0	0	0	0	0	0	0	0.00166322	0	0	0	0	0	0.00376967	0	0	0	0	0
270	0.58257	22.976	23.059	0	0	0	0	0	0.00339631	0	0	0	0	0	0	0	0	0	0	0	0	0	0	0	0	0	0	0	0.00672817	0	0	0	0.000389405
192	0.58257	15.092	15.153	0	0	0	0	0	0	0	0	0	0	0	0.00292732	0	0	0	0	0.00312907	0	0	0	0	0	0	0	0	0	0	0	0	0.000187953
203	0.58257	30.941	30.991	0.00287705	0	0	0	0	0.00110928	0	0	0	0	0	0	0	0	0	0	0	0	0	0	0.00128317	0	0	0	0	0	0	0	0	0
177	0.58257	38.099	38.155	0	0	0	0	0	0	0	0	0.000863405	0	0	0	0	0	0	0	0.00192638	0	0	0	0	0	0.00141601	0	0	0	0	0	0	0
126	0.58257	44.532	44.55	0	0	0	0	0	0	0	0.00125644	0	0	0	0	0	0	0	0	0.00123883	0	0	0	0.00165706	0	0	0	0	0	0	0	0	0
110	0.58257	44.532	44.55	0	0	0	0	0	0	0	0.00117041	0	0	0	0	0	0	0	0	0.00121425	0	0	0	0.0014863	0	0	0	0	0	0	0	0	0
54	0.58257	44.532	44.55	0	0	0	0	0	0	0	0.00113304	0	0	0	0	0	0	0	0	0.0011313	0	0	0	0.00142932	0	0	0	0	0	0	0	0	0
140	0.58257	44.532	44.55	0	0	0	0	0	0	0	0.000911998	0	0	0	0	0	0	0	0	0.000923941	0	0	0	0.00110482	0	0	0	0	0	0	0	0	0
95	0.58257	44.532	44.55	0	0	0	0	0	0	0	0.000917087	0	0	0	0	0	0	0	0	0.000934309	0	0	0	0.00104953	0	0	0	0	0	0	0	0	0
298	0.58257	38.128	38.146	0	0	0	0	0	0.000379939	0	0	0	0	0	0	0	0	0	0	0	0.000886457	0	0	0	0	0.00143567	0	0	0	0	0	0	0
224	0.58257	44.562	44.57	0	0	0	0	0.000676625	0	0	0	0	0	0	0	0	0	0	0	0	0.00134737	0	0	0	0	0.000672813	0	0	0	0	0	0	0
192	0.58257	44.563	44.582	0	0	0	0	0	0.000394481	0	0	0	0	0	0	0	0	0	0	0	0.00168307	0	0	0	0	0.000437973	0	0	0	0	0	0	0
322	0.58257	44.563	44.582	0	0	0	0	0.00036541	0	0	0	0	0	0	0	0	0	0	0	0	0.00149711	0	0	0	0	0.000609823	0	0	0	0	0	0	0
235	0.58257	38.11	38.164	0	0	0	0	0	0	0	0	0	0	0	0	0	0	0	0	0	0.00105017	0	0	0.000225212	0	0.00112178	0	0	0	0	0	0	0
61	0.58257	20.358	20.377	0	0	0	0	0	0	0	0	0	0	0	0	0.000322489	0	0	0	0	0.000969455	0	0.00105528	0	0	0	0	0	0	0	0	0	0
58	0.58257	22.982	23.024	0	0	0	0	0	0	0	0	0	0	0	0	0	0	0	0	0	0.000365079	0	0	0	0.000513788	0	0	0	0	0.00104259	0	0	0
313	0.58257	38.117	38.146	0	0	0	0	0	0	0	0	0	0	0.000517003	0	0	0	0	0	0	0.000929525	0	0	0	0	0.000470102	0	0	0	0	0	0	0
132	0.58257	44.557	44.591	0	0	0	0	0	0	0	0	0	0	0	0	0	0	0	0	0.00041561	0	0	0	0	0	0	0	0	0	0.00141758	2.22323e-05	0	0
263	0.58257	38.128	38.154	0	0	0	0	0.000321096	0	0	0	0	0	0	0	0	0	0	0	0	0.000730443	0	0	0	0	0.000748275	0	0	0	0	0	0	0
163	0.58257	38.128	38.145	0	0	0	0	0	0.000312782	0	0	0	0	0	0	0	0	0	0	0	0.000671403	0	0	0	0	0.000777445	0	0	0	0	0	0	0
124	0.58257	22.987	23.045	0	0	0	0	0	0.00054175	0	0	0	0	0	0	0	0	0	0	0	0	0	0	0	0	0	0	0	0.00106404	0	0	4.22862e-05	0
56	0.58257	1.757	1.802	0	0	0	0	0	0	0	0	0	0	0.000374993	0	0	0	0	0	0	0.000318018	0	0	0	0	0	0	0	0.000911167	0	0	0	0
249	0.58257	44.573	44.591	0	0	0	0	0.000594535	0	0	0.000411552	0	0	0	0	0	0	0	0	0	0	0	0	0	0.000516964	0	0	0	0	0	0	0	0
78	0.58257	1.721	1.721	0.000381172	0	0	0	0	0	0	0	0.000187381	0	0	0	0	0	0	0	0	0	0	0	0	0.000850926	0	0	0	0	0	0	0	0
164	0.58257	30.967	30.991	0	0	0	0	0	0.000405453	0	0	0.000444776	0	0	0	0	0.000563914	0	0	0	0	0	0	0	0	0	0	0	0	0	0	0	0
76	0.58257	1.798	1.8	0	0	0	0	0	0	0	0	0	0	0	0	0.000259975	0	0	0	0	0	0	0	0.000457166	0	0.000631594	0	0	0	0	0	0	0
223	0.58257	23.014	23.02	0	0	0	0	0	0.000407965	0	0	0	0	0	0	0	0	0	0	0	0	0	0	0	0	0	0	0	0.0007877	0	0	0	5.38268e-05
234	0.58257	38.145	38.154	0	0	0	0	0	0.000171065	0	0	0	0	0	0	0	0	0	0	0	0.000711904	0	0	0	0	0.000301001	0	0	0	0	0	0	0
71	0.58257	30.967	30.983	0	0	0	0	0	0.000408494	0	0	0.000434172	0	0	0	0	0.000294208	0	0	0	0	0	0	0	0	0	0	0	0	0	0	0	0
135	0.58257	30.967	30.991	0	0	0	0	0	0.000296521	0	0	0.000431557	0	0	0	0	0.000224592	0	0	0	0	0	0	0	0	0	0	0	0	0	0	0	0
220	0.58257	30.955	30.991	0	0	0	0	0	0.000216673	0	0	0.00022936	0	0	0	0	0.000440693	0	0	0	0	0	0	0	0	0	0	0	0	0	0	0	0
102	0.58257	15.112	15.135	0	0	0	0	0	0.000153615	0	0	0	0	0	0	0	0	0	0	0.000689919	0	0	0	0	0	0	0	0	0	0	0	0	1.63332e-05
237	0.633844	30.941	30.991	0.00124018	0	0	0	0	0.000875287	0.000905069	0	0.00125734	0	0	0	0.000456269	0.000732159	0	0	0	0.00340436	0.000718182	0.000825919	0.00180439	0	0.000849735	0.00160043	0	0	0.00227152	0	3.70262e-05	0
153	0.646863	30.925	31.004	0	0.000854875	0	0	0	0.000433744	0	0	0.000266982	0.000609008	0	0.000550235	0.000454324	0.000355244	0.000230181	0	0.000824407	0	0	0	0	0	0	0.000665259	0.0013324	0	0	0	0	0
60	0.650342	30.949	30.985	0.00113964	0	0	0	0	0.000508832	0	0	0.00100372	0	0	0	0.000321226	0.000564798	0	0	0	0.00099541	0	0	0.000542126	0	0.000731576	0.000721703	0	0	0	0	0	0
193	0.651097	22.966	23.053	0.00513111	0	0	0	0.00164689	0.00265085	0.00334756	0.00279245	0	0	0	0.00273488	0	0.0021963	0.00202975	0	0	0	0.00299991	0	0	0	0	0	0	0.00331428	0	0.000218692	0.00044899	0.000747866
56	0.661683	1.874	2.067	0	0	0	0	0.0034889	0.00403748	0	0	0	0	0.00705557	0	0.00246869	0	0	0	0.00768539	0	0.00642139	0	0	0	0	0.0074621	0	0	0	0	0	0
253	0.664934	30.922	31.002	0.00604605	0	0	0	0	0.00128616	0	0	0.00234241	0	0	0	0.000732674	0.00146671	0	0	0	0	0	0	0.00139307	0	0.0028204	0	0	0	0	0	0	0
178	0.667153	22.981	23.045	0	0	0	0	0	0.00209535	0	0	0	0	0	0	0.0015162	0	0	0	0	0	0	0	0	0	0	0	0	0.0057203	0	0	0.000358264	0
324	0.667153	22.981	23.059	0	0	0	0	0	0.00256042	0	0	0	0	0	0	0	0	0.00119076	0	0	0	0	0	0	0	0	0	0	0.00504096	0	0	0	0.00034593
307	0.667153	30.959	30.985	0.000880672	0	0	0	0	0	0	0	0.000288044	0	0	0	0	0	0	0	0	0.00107898	0	0	0.000294494	0	0	0	0	0	0	0	0	0
121	0.667153	20.37	20.378	0	0	0	0	0	0.000300223	0	0	0	0	0	0.000815288	0	0	0.000355042	0	0	0	0	0	0.000569266	0	0	0	0	0	0	0	0	0
262	0.667153	38.127	38.161	0	0	0	0	0	0.000608378	0	0	0	0	0	0	0.000282822	0	0	0	0	0.000774366	0	0	0	0	0.000321293	0	0	0	0	0	0	0
132	0.714735	10.19	10.45	0	0	0	0.00367326	0	0	0	0	0	0.0151588	0	0	0	0	0.00277016	0.0136794	0	0	0	0.0116063	0	0	0	0.00579075	0.012765	0.00891031	0	0	0	0
224	0.735705	30.959	30.991	0.00235783	0	0	0	0	0.000504338	0	0	0.000609496	0	0	0	0.00035467	0.000407699	0	0	0	0.00103078	0.000688038	0	0.000594889	0	0.00156292	0.000817463	0	0	0.00226382	0	0	0
269	0.755739	30.926	30.993	0.0036908	0	0	0	0	0.00149755	0	0	0	0	0	0	0	0.00118621	0	0	0	0.00302046	0	0	0	0	0	0.00264464	0	0	0	0	0	0
254	0.755739	30.941	30.983	0.000918174	0	0	0	0	0.000457672	0	0	0	0	0	0	0	0	0	0	0	0.000606658	0	0	0.000403223	0	0	0.00072122	0	0	0	0	0	0
179	0.803164	22.983	23.04	0	0.000891391	0	0	0.000280123	0.000745203	0	0	0	0	0	0	0	0.000315438	0.000207942	0.000759942	0	0	0	0.00162887	0	0.000707181	0.000724389	0	0.00145999	0	0	0	0.00011407	0.000115286
340	0.812127	38.059	38.108	0	0	0.00164013	0.000401246	0	0.000340147	0.000792888	0	0	0	0	0	0	0	0.000272539	0.00175758	0	0	0	0.00122434	0	0	0.000617855	0	0	0	0	0	0	0
340	0.829563	38.177	38.203	0	0	0.00177633	0.000522062	0	0	0	0	0	0	0	0.0012028	0	0.000467319	0	0	0	0.00553608	0	0.000866479	0	0.00170041	0.00257478	0	0.00356755	0	0	0	0	0
190	0.842048	44.537	44.603	0	0	0	0	0	0	0	0.000462122	0	0	0	0	0	0	0	0	0	0.00182055	0	0	0.000393277	0	0.00041451	0	0	0	0.0019512	0	3.58402e-05	0
202	0.842048	30.941	31.002	0	0	0	0	0	0.000249591	0	0	0	0	0	0	0	0	0	0	0	0.000754971	0	0.000926422	0	0	0.00115264	0	0	0.000565406	0	0	4.42974e-05	0
195	0.843478	30.943	31.019	0.00139731	0	0	0	0	0.000644072	0	0	0.000747054	0	0	0	0.000217683	0.000469884	0	0	0	0.000728731	0	0.000782129	0	0	0	0	0	0	0.00166476	0	0	0
176	0.843478	15.121	15.146	0	0	0	0	0	0.000611683	0	0	0	0.000565887	0	0	0.000225947	0	0	0	0	0	0	0	0.000548532	0	0	0.000557921	0	0.000873809	0	0	5.39579e-05	0.000134724
